1 **Mitochondrial function is essential for humoral immunity by controlling flux of**  
2 **the TCA cycle, phosphatidic acid and mTOR activity in B cells**

3 Sophia Urbanczyk<sup>1</sup>, Olivier R. Baris<sup>2</sup>, Jörg Hofmann<sup>3</sup>, Florian Golombek<sup>4</sup>, Kathrin  
4 Castiglione<sup>4</sup>, Xianyi Meng<sup>5</sup>, Aline Bozec<sup>5</sup>, Dimitrios Mougiakakos<sup>6</sup>, Sebastian R. Schulz<sup>1</sup>,  
5 Wolfgang Schuh<sup>1</sup>, Ursula Schlötzer-Schrehardt<sup>7</sup>, Tobit D. Steinmetz<sup>1</sup>, Susanne Brodesser<sup>8</sup>,  
6 Rudolf J. Wiesner<sup>8,9</sup>, Dirk Mielenz<sup>1,\*,#</sup>

7  
8 <sup>1</sup>Division of Molecular Immunology, Universitätsklinikum Erlangen, Nikolaus-Fiebiger-Zentrum, FAU  
9 Erlangen-Nürnberg, Erlangen, Germany

10 <sup>2</sup>UMR CNRS 6015/INSERM U1083, MitoVasc, University of Angers, France

11 <sup>3</sup>Chair of Biochemistry, Department Biology, FAU Erlangen-Nürnberg, Erlangen, Germany

12 <sup>4</sup>Chair of Bioprocess Engineering, Technical Faculty, FAU Erlangen-Nürnberg, Erlangen, Germany

13 <sup>5</sup>Department of Internal Medicine III, Universitätsklinikum Erlangen, Nikolaus-Fiebiger-Zentrum, FAU  
14 Erlangen-Nürnberg, Erlangen, Germany

15 <sup>6</sup>Department of Internal Medicine V, Universitätsklinikum Erlangen, Translational Research Center,  
16 FAU Erlangen-Nürnberg, Erlangen, Germany

17 <sup>7</sup>Department of Ophthalmology, Universitätsklinikum Erlangen, FAU Erlangen-Nürnberg, Erlangen,  
18 Germany

19 <sup>8</sup>Cologne Excellence Cluster on Cellular Stress Responses in Aging-associated Diseases (CECAD),  
20 University of Köln, Germany

21 <sup>9</sup>Center for Physiology and Pathophysiology, Institute of Vegetative Physiology and Center for  
22 Molecular Medicine Cologne (CMMC), University of Köln, Germany

23  
24 <sup>\*,#</sup> correspondence and lead contact: Dr. Dirk Mielenz, Division of Molecular Immunology,  
25 Universitätsklinikum Erlangen, Nikolaus-Fiebiger-Zentrum, FAU Erlangen-Nürnberg,  
26 Erlangen, Germany

27 E-Mail: [dirk.mielenz@fau.de](mailto:dirk.mielenz@fau.de), Phone: ++49 9131 8539105

## 28 **Abbreviations**

29 Ab, antibody, AMPK, Adenosine monophosphate activated kinase, BCR, B cell receptor, BM,  
30 bone marrow, CSR, class switch recombination, ETC, electron transport chain, FA, fatty acid,  
31 FAD, flavine adenine dinucleotide, GC, germinal center, G3P, Glyceraldehyde-3-phosphate,  
32 GPL, glycerophospholipid, IMM, inner mitochondrial membrane, IRF4, Interferon regulatory  
33 factor 4, LC-MS, liquid chromatography mass spectrometry, LPA, lysophosphatidic acid,  
34 LPAAT, Lysophosphatidic acid acyltransferase, MZ, marginal zone, mtDNA, mitochondrial  
35 DNA, mtRC, mitochondrial respiratory chain, NAD, nicotinamide adenine dinucleotide, NP-  
36 KLH, Nitrophenol keyhole limpet hemocyanin, PEP, phosphoenolpyruvate, PA, phosphatidic  
37 acid, PC, phosphatidylcholine, PE, phosphatidylethanolamine, PG, phosphatidylglycerol, PI,  
38 phosphoinositol, PS, phosphatidylserine, PI3K, phosphoinositol-3-kinase, pRPS6,  
39 phosphorylated ribosomal protein RPS6, SRBC, sheep red blood cell, SHM, somatic  
40 hypermutation, SDH, Succinate dehydrogenase, TCA, tricarboxylic acid cycle, TD, T-cell  
41 dependent, TI, T-cell independent, UDPNAG, Uridine Diphosphate N-acetylglucosamine, vHL,  
42 von Hippel-Lindau protein

43

## 44 **Abstract**

45 The function of mitochondrial respiration during B cell fate decisions and differentiation remains  
46 equivocal. This study reveals that selection for mitochondrial fitness occurs during B cell  
47 activation and is essential for subsequent plasma cell differentiation. By expressing a mutated  
48 mitochondrial helicase in transitional B cells, we depleted mitochondrial DNA during B cell  
49 maturation, resulting in reduced oxidative phosphorylation. Although no changes in follicular B  
50 cell development were evident, germinal centers, class switch recombination to IgG, plasma  
51 cell generation and humoral immunity were diminished. Defective oxidative phosphorylation  
52 led to aberrant flux of the tricarboxylic acid cycle and lowered the amount of saturated  
53 phosphatidic acid. Consequently, MTOR activity and BLIMP-1 induction were curtailed

54 whereas HIF1 $\alpha$ , glycolysis and AMPK activity were amplified. Exogenous phosphatidic acid  
55 increased mTOR activity in activated B cells. Hence, mitochondrial function is required and  
56 selected for in activated B cells for the successful generation of functional plasma cells.

## 57 **Introduction**

58 Humoral immunity depends on the development of antibody (Ab) secreting long-lived plasma  
59 cells. There are T cell independently (TI) generated, IgM secreting short-lived plasma cells  
60 derived from marginal zone (MZ) or B1 B cells, T cell dependently (TD) activated and class  
61 switched plasma cells secreting mainly IgA in gut associated tissues or long lived plasma cells  
62 secreting IgA, IgM or IgG in the bone marrow (Schuh et al., 2020). All plasma cells have  
63 undergone profound anabolic and morphologic changes, such as cell growth and expansion  
64 of the endoplasmic reticulum during several cell divisions (Nutt et al., 2011). Several models  
65 explain the incremental up-regulation of plasma cell specific transcription factors of the B cell  
66 lineage, such as BLIMP1 or XBP1 (Hawkins et al., 2013). BLIMP1 is required for the fully  
67 secretory phenotype of plasma cells (Kallies et al., 2007) which appears to involve oxidative  
68 phosphorylation (OxPhos) (Price et al., 2018). On the other hand, mature plasma cells depend  
69 on glucose uptake for Ab glycosylation and import of pyruvate into mitochondria (Lam and  
70 Bhattacharya, 2018). The metabolism of mature plasma cells is distinct from resting B cells  
71 which primarily consume fatty acids (FA) to support OxPhos in mitochondria (Caro-Maldonado  
72 et al., 2014) and depend on continuous degradation of hypoxia inducible factor 1 $\alpha$  (HIF1 $\alpha$ ) (Xu  
73 et al., 2019). Yet, resting B cells increase OxPhos, glucose uptake and glycolysis when  
74 activated by the B cell receptor (BCR) or the innate stimulus lipopolysaccharide (LPS) already  
75 within 6h, switching to glucose and glutamine catabolism (Caro-Maldonado et al., 2014). Anti  
76 CD40/IL-4 activated B cells utilize glucose to support the pentose phosphate pathway (PPP)  
77 that is also used by many tumour cells for the rapid generation of nucleotides and other  
78 anaplerotic precursors required for cell proliferation (Waters et al., 2018). There also appears  
79 to be mitochondrial remodeling (Waters et al., 2018), with IRF4 supporting mitochondrial  
80 homeostasis in established plasma cells (Low et al., 2019). OxPhos is fueled by the

81 Krebs/tricarboxylic acid cycle (TCA) in mitochondria (Kennedy and Lehninger, 1949). The TCA  
82 cycle utilizes progressive transformation of oxaloacetate into TCA intermediates such as  
83 citrate,  $\alpha$ -ketoglutarate, succinate, fumarate or malate by addition or removal of C atoms. In  
84 some of these reactions, net energy is transferred to reduction equivalents, such as  
85 nicotinamide adenine dinucleotide (NAD) or flavine adenine dinucleotide (FAD), to yield NADH  
86 or FADH<sub>2</sub> (Krebs, 1948). Complex I oxidizes NADH and while the electrons are transported  
87 along the electron transport chain (ETC) complexes, protons are pumped across the inner  
88 mitochondrial membrane (IMM). Complex II oxidizes FADH<sub>2</sub> without proton transport.  
89 Complex III and IV again pump protons across the IMM while transferring electrons to O<sub>2</sub>, the  
90 terminal essential electron acceptor, which is reduced to H<sub>2</sub>O. Complex V, the ATP synthase,  
91 utilizes the chemiosmotic gradient to efficiently generate ATP. OxPhos up-regulation  
92 accompanies plasma cell generation and is maintained by IRF4 in plasma cells (Low et al.,  
93 2019; Price et al., 2018), but a causal relation between OxPhos, B cell activation and plasma  
94 cell generation has been questioned (Milasta et al., 2016). The upregulation of OxPhos genes  
95 by BLIMP1 affects nuclear genes essential for the assembly of complexes I-V of the  
96 mitochondrial respiratory chain (mtRC) (Price et al., 2018). Nonetheless, only Complex II is  
97 encoded entirely by nuclear genes, while the essential subunits of the mtRC complexes I, III,  
98 IV and V are encoded by mitochondrial DNA (mtDNA) (Gustafsson et al., 2016). In total,  
99 mtDNA codes for these 13 crucial subunits and also contains the genes for 22 tRNAs and 2  
100 ribosomal RNAs necessary for their synthesis in the mitochondrial matrix. Expression of mtRC  
101 subunits requires continuous replication and transcription of mtDNA which needs to be  
102 unwound by the essential mitochondrial helicase PEO1/TWINKLE (TWINKLE) (Milenkovic et  
103 al., 2013; Spelbrink et al., 2001). Dominant negative mutants of TWINKLE impair mtDNA  
104 replication, thereby causing mitochondrial disease in humans due to multiple mtDNA deletions  
105 and/or depletion (Goffart et al., 2009; Sarzi et al., 2007; Spelbrink et al., 2001). Those large  
106 mtDNA deletions, even in the presence of wild-type (WT) molecules (called a heteroplasmic  
107 state), reduce the amount of newly synthesized subunits. Truncated or fused subunits further

108 impair ETC function and ATP production (Hornig-Do et al., 2012; von Kleist-Retzow et al.,  
109 2007).

110 The mammalian target of Rapamycin (MTOR) complex, specifically the Rapamycin-sensitive  
111 MTORC1 complex (Iwata et al., 2017), has been proposed to integrate the metabolic fate of  
112 glucose, glutamine and lipids (Foster et al., 2014). Intriguingly, MTORC1 is required for the  
113 generation, but not maintenance, of plasma cells (Benhamron et al., 2015; Jones et al., 2016).  
114 These data suggest that there is an anabolic control of plasma cell development via MTOR  
115 (Lam and Bhattacharya, 2018). MTORC1 is activated by the AKT/Phosphoinositol-3-kinase  
116 (PI3K) pathway, by glucose, glutamine and growth factors (Iwata et al., 2017). MTORC1 is  
117 also directly activated by phosphatidic acid (PA) (Toschi et al., 2009) that is either generated  
118 through cleavage of membrane lipids via the phospholipase D (PLD) pathway or synthesized  
119 *de novo* via the lysophosphatidic acid (LPA) acyltransferase (LPAAT) (Foster et al., 2014)  
120 pathway. The LPAAT pathway integrates metabolites of glycolysis, glyceraldehyde-3-  
121 phosphate (G3P), and the TCA cycle, namely citrate, to form FA and then PA (Foster, 2013).  
122 PA is present in low amounts, acts mainly as a signaling molecule but is also a precursor in  
123 the synthesis of other membrane lipids (Athenstaedt and Daum, 1999).

124 We hypothesized that depletion of mtDNA in mature B cells will compromise OxPhos in  
125 activated B cells and thereby bring new insights on its function in this cell type. The approach  
126 of mtDNA depletion circumvents the use of inhibitors in mice and in cell culture. Interestingly,  
127 the murine K320E dominant negative TWINKLE (DNT) variant (Baris et al., 2015), equivalent  
128 to the K319E human mutation (Hudson et al., 2005), leads to massive mtDNA depletion when  
129 expressed in rapidly dividing cells such as keratinocytes (Weiland et al., 2018). To determine  
130 the importance of mtDNA and the mtRC in rapidly dividing B cells *in vivo*, we specifically  
131 expressed DNT in B cells to induce mtDNA depletion. We found increased replication of  
132 mtDNA during wild type B cell activation. Altered mtDNA replication in the presence of DNT  
133 hindered GC B cell development, BLIMP1 expression as well as plasma cell generation due  
134 to lowered OxPhos activity, reduced generation of PA as a consequence of the disturbed TCA  
135 cycle, and reduced MTOR activity in early plasmablasts. In addition, plasma cells expressing

136 DNT were outcompeted. Hence, our results place OxPhos upstream of BLIMP1 and MTOR  
137 induction during plasma cell differentiation to ensure selection for mitochondrial fitness.

138

## 139 **Results**

### 140 **Mitochondrial DNA is up-regulated in activated and marginal zone B cells**

141 To determine the abundance of mitochondrial DNA (mtDNA) we isolated B cell subsets by flow  
142 cytometric cell sorting (Figure S1). Abundance of the *16s* rRNA gene encoded by mtDNA was  
143 quantified by qPCR and normalized to nuclear DNA (Figure 1a). MZ B cells, splenic plasma  
144 cells and BM plasma cells identified by CD138 and TACI staining (Pracht et al., 2017) exhibit  
145 higher amounts of mtDNA than follicular B cells (FO). These data suggest that there is  
146 replication of mtDNA during B cell maturation from transitional B cells to MZ B cells (Loder et  
147 al., 1999) and from resting B cells to plasma cells. GC B cells showed only a slight increase of  
148 mtDNA compared to FO B cells. GC B cells are the most rapidly dividing cells in the mammalian  
149 body (MacLennan, 1994). This implies that proliferation is accompanied by mtDNA replication  
150 in order to keep the copy number constant. To test rigorously whether proliferation and  
151 differentiation indeed increase mtDNA copy number in B cells, we quantified it in LPS-activated  
152 B cells (Figure 1b). This revealed a ~ two-fold increase in mtDNA between d0 and d3 of  
153 activation (Figure 1b). Together, these data suggest that there is an increased requirement for  
154 proteins of the mtRC that are encoded by mtDNA (Gustafsson et al., 2016) during B cell  
155 proliferation and/or differentiation. Thus, to interfere with the function of the mtRC in activated  
156 B cells, but avoid affecting the metabolic checkpoints of early B cell development (Urbanczyk  
157 et al., 2018), we crossed mice carrying a loxP-flanked STOP cassette upstream of K320E-  
158 TWINKLE (DNT) coupled to IRES-GFP (Baris et al., 2015) with CD23CRE mice (Kwon et al.,  
159 2008) to obtain DNTxCD23CRE (short: DNT mice) (Figure 1c). We found expression of DNT,  
160 indicated by GFP expression, in B cells but not T cells (Figure 1d). To determine the onset of  
161 GFP expression we analyzed B cells in the BM (Figure S2), revealing that ~20% of transitional  
162 B cells and ~90% of mature, recirculating B cells express GFP. These data are consistent with

163 the onset of CD23 expression in transitional type 2 B cells (Loder et al., 1999) and show that  
164 CRE mediated excision of the floxed STOP cassette of DNT mice does not show a complete  
165 penetrance, enabling competition of STOP cassette-deleted vs. -non-deleted B cells *in vivo*.  
166 In keeping with DNT expression in immature/transitional BM B cells, mtDNA was already  
167 reduced about ten-fold in resting splenic B cells of DNT mice (Figure 1e) and B cell activation  
168 by LPS was not able to increase the amount of mtDNA further, in contrast to WT B cells (Figure  
169 1b, e).

170

### 171 **Replication of mtDNA in B cells is essential for humoral immunity**

172 Since we observed GFP expression already in transitional B cells, we assessed B cell  
173 maturation in spleens of DNT mice with CD23CRE mice as controls (see representative FACS  
174 plots in Figure 2a-c). The total numbers of MZ B cells and plasmablasts/plasma cells were  
175 comparable and FO B cell numbers were even increased. The frequencies of GC B cells in  
176 Peyer's patches were normal. Numbers of plasmablasts/plasma cells in the BM were also not  
177 altered (Figure 2d). However, the frequency of GFP<sup>+</sup> MZ B cells was lower than in the FO B  
178 cell population (Figure 2e). More strikingly, the frequency of GFP expressing GC B cells was  
179 reduced to ~20%, with a further decrease (down to ~8%) in TACI<sup>+</sup>CD138<sup>+</sup> BM  
180 plasmablasts/plasma cells. Plasmablasts/plasma cells in the spleen showed also a reduced  
181 GFP expression (~25%). We conclude that DNT-expressing transitional B cells have a minor  
182 intrinsic disadvantage during MZ B cell development, which is consistent with the relatively  
183 high mtDNA amount in MZ B cells. In addition, DNT B cells have a strong disadvantage during  
184 the GC reaction that is even more pronounced in BM plasmablasts/plasma cells. The  
185 development of splenic plasmablasts/plasma cells, a heterogeneous population of short-lived,  
186 long lived, IgM expressing, and class-switched cells derived from the GC reaction and  
187 extrafollicular responses (Schuh et al., 2020) is also hampered by DNT expression.  
188 Unexpectedly, considering the normal numbers of plasma cells, serum abundance of class-  
189 switched Ig isotypes was reduced (Figure 2f) while IgM was not. A significant fraction of IgM is

190 secreted by extrafollicular plasmablasts (Schuh et al., 2020). To determine how DNT-  
191 expression affects various plasma cell subtypes in the spleen and BM we analyzed plasma  
192 cell subsets in detail based on CD138, TACI, CD19 and B220 expression, namely the non-  
193 proliferating P3 cells (CD138<sup>high</sup>, TACI<sup>high</sup>, CD19<sup>low</sup>, B220<sup>low</sup>, BLIMP1<sup>high</sup>), the non-proliferating  
194 P2 cells (CD138<sup>high</sup>, TACI<sup>high</sup>, CD19<sup>int</sup>, B220<sup>low</sup>, BLIMP1<sup>med</sup>) and the proliferating P1 (CD138<sup>high</sup>,  
195 TACI<sup>high</sup>, CD19<sup>int</sup>, B220<sup>int</sup>, BLIMP1<sup>low</sup>) cells (Cossarizza et al., 2019; Pracht et al., 2017) (Figure  
196 3a). Total cell numbers of P1, P2 and P3 plasma cells in spleen and BM were not affected by  
197 DNT expression (Figure 3b). Moreover, GFP expression was similar in B cells and P1 plasma  
198 cells in the spleen (76.5 % vs. 65.6 %) (Figure 3c). Interestingly, the P1 plasma cell population  
199 had a lower frequency of GFP expression in the BM than in the spleen (40.4% vs. 65.6%),  
200 suggesting that DNT expression disfavors the transition of plasma cells from the spleen to  
201 the BM. Strikingly, the frequency of GFP expressing cells dropped sharply in the non-  
202 proliferating P2 (spleen: 28.3%, BM: 8,9%) and even more so in P3 cells (spleen:10.1 %, BM:  
203 3.1%) (Figure 3c). Hence, DNT-expression confers a disadvantage to developing plasma cells.  
204 Consequently, P2 and P3 plasma cells without the recombined DNT locus fill up the plasma  
205 cell compartments in spleen and BM. We conclude that a functional respiratory chain, which  
206 requires continuous replication of mtDNA, is necessary for the generation of plasma cells in  
207 the bone marrow. To challenge B cells, we immunized mice with sheep red blood cells (SRBC).  
208 Splenic GC formation as assessed by histology was severely impaired in SRBC immunized  
209 DNT mice (Figure 4a), pointing to a profound requirement of the mtRC for the GC reaction.  
210 Immunization of DNT mice with the TD antigen Nitrophenol-keyhole limpet hemocyanin (NP-  
211 KLH) revealed a ~10-fold reduction of primary and a 4-5-fold reduction of secondary NP  
212 specific IgG responses (Figure 4b). Surprisingly, NP-KLH elicited NP-specific IgM was not  
213 reduced (Figure 4b) although DNT-expressing plasmablasts/plasma cells appear to have a  
214 specific developmental disadvantage as indicated by the homeostatic outcompetition of GFP<sup>+</sup>  
215 cells (Figure 2e).

216



## 217 **Replication of mtDNA supports class switch recombination to IgG**

218 It remained unclear which particular mechanisms were involved in the different NP-specific  
219 IgM and IgG responses. The decreased NP-specific IgG response could be due to the reduced  
220 GC reaction, reduced class switch recombination (CSR) or reduced GC derived plasma cell  
221 development, as already suggested in Figure 2e. Jang et al. proposed that activated B cells  
222 with a high mitochondrial content are more prone to undergo CSR (Jang et al., 2015). To  
223 determine whether mtRC activity is required for CSR we stimulated splenic B cells with LPS,  
224 anti CD40 antibody, IL-4, IL-5, transforming growth factor  $\beta$  (TGF $\beta$ ) and retinoic acid (modified  
225 after (Chiu et al., 2019)). CSR to IgG was reduced by 40% while CSR to IgA was not affected  
226 as measured by the frequencies of IgA and IgG expressing B cells (Figure 4c,d). DNT  
227 expressing cells as indicated by GFP expression were only slightly underrepresented in the  
228 IgA<sup>+</sup> fraction (Figure 4e, f). This result is consistent with the observation that homeostasis of  
229 existing IgA<sup>+</sup> cells appears to be mediated through glycolysis (Kunisawa, 2017). We conclude  
230 that a functional mtRC is important for CSR to IgG.

## 231 **The development of antigen specific bone marrow plasma cells depends on OxPhos**

232 Next, we addressed why NP-specific IgM responses were unaltered, but IgG responses were  
233 reduced in NP-KLH immunized DNT mice. Already in non-immunized mice, expression of DNT  
234 in GC B cells and in P2 and P3 plasma cells from spleen and BM, as determined by GFP  
235 expression, was significantly lower than in FO B cells (Figure 2e, 3b, c). We interpret these  
236 data as intercellular competition between B cells expressing a functional mtRC and those with  
237 GFP expression and reduced mtDNA. To show this directly we analyzed the development of  
238 antigen-specific plasma cells after the NP-KLH immunization using the CD138, TACI, CD19  
239 and B220 staining applied in Figure 3 (Cossarizza et al., 2019; Pracht et al., 2017). Antigen  
240 specificity was determined by surface staining with NP-PE, which detects antigen-specific,  
241 surface IgM and IgA expressing plasma cells (Blanc et al., 2016). Immunization with NP-KLH  
242 clearly elicited NP-specific, CD138<sup>high</sup> plasma cells in control and in DNT mice (Figure 5a).  
243 However, the cells binding surface NP-PE in DNT mice were hardly GFP positive (Figure 5a,

244 b) as NP-PE staining and GFP expression were almost exclusive. In accordance with data  
245 from unimmunized animals (Figure 3), the frequencies of plasmablasts/plasma cells regardless  
246 of their proliferative state (Pracht et al., 2017) were unaltered but the frequencies of NP-binding  
247 plasma cells were reduced by ~40% in immunized DNT mice (Figure 5c). Together, these data  
248 suggest that DNT-expressing plasmablasts are outcompeted during TD immune responses by  
249 NP-specific plasmablasts lacking transgenic DNT expression. To determine at which  
250 developmental stage DNT expressing plasmablasts are outcompeted, we analyzed GFP  
251 expression in P1, P2 and P3 plasma cells (Figure 5d, e). GFP expression was reduced in all  
252 the aforementioned subsets but the lowest GFP expression was detected in the P3 plasma  
253 compartment (2.2%). Together these data show that DNT expression interferes with the  
254 abundance of NP-specific plasma cells, whereas cells with intact mtDNA replication are not  
255 affected and show a relative expansion.

256

## 257 **Replication of mtDNA sustains T cell-dependent and T cell-independent proliferation of** 258 **B cells**

259 The GC reaction, CSR and plasma cell differentiation all rely on sustained proliferation of  
260 activated B cells. Therefore, we determined whether and how prevention of mtDNA replication  
261 affects B cell proliferation, survival and plasmablast development *in vitro*. Survival of LPS  
262 activated B cells was not affected by DNT expression after 3 of activation (Figure 6a, b). To  
263 assess proliferation and plasmablast differentiation simultaneously we used a dye dilution  
264 assay and stained cells with the plasma cell marker CD138 (Nutt et al., 2011). This experiment  
265 showed that proliferation elicited by LPS as well as by CSR-inducing conditions (see Figure 4)  
266 was reduced by DNT expression (Figure 6c, d; Figure S3). To control this experiment  
267 intrinsically we took advantage of the fact that GFP expression of DNT B cells was not 100%  
268 (Figure S2b). This experiment revealed that DNT-expressing cells (green symbols, Figure S3b)  
269 accumulated less in divisions 5 and 6 under CSR inducing conditions and with LPS compared  
270 to B cells from the same culture that have not recombined (grey symbols, Figure S3b) or

271 CD23CRE expressing B cells (black symbols, Figure S3b). However, we found DNT  
272 expressing LPS blasts that had divided 5 or 6 times (Figure 6 c, d, e; Figure S3b) but even  
273 those cells expressed less CD138 (Figure 6f). We conclude that DNT expression limits  
274 plasmablast development by limitation of proliferation and differentiation. To assess later time  
275 points we also investigated survival under CSR-inducing conditions because B cells live up to  
276 9d under these conditions. However, in this setting, survival of DNT-expressing B cells dropped  
277 significantly on d7 and d9 and the surviving DNT-expressing cells displayed a markedly  
278 increased side scatter (Figure S4).

### 279 **LPS-induced plasmablast development requires a functional mitochondrial respiratory** 280 **chain**

281 Although survival of LPS activated DNT B cells was not altered on d3, the frequency of  
282 CD138/TACI-expressing and CD138/BLIMP1 expressing plasmablasts was diminished  
283 (Figure 6g-j). In contrast, TACI expressing cells were proportionally increased (Figure 6g, h).  
284 In agreement with an accumulation of DNT-expressing plasmablasts in the TACI positive stage  
285 (Figure 6g, h), GFP-expressing cells were enriched at this stage but outcompeted by 40% at  
286 the TACI/CD138 positive stage (Figure 6k, l). In addition, immunoblots of day 3 LPS blasts  
287 showed that BLIMP1, XBP1 and IgM protein abundancies were lower while the amount of IRF4  
288 was comparable (Figure 7a, b). Moreover, secreted IgM, IgG and IL-10 were also less  
289 abundant in DNT cell culture supernatants (Figure 7c, d). We conclude that DNT expression  
290 interferes with B cell intrinsic plasma cell differentiation but not with B cell activation elicited by  
291 LPS or LPS/anti-CD40/IL-4/IL-5/TGF $\beta$ /retinoic acid. We next examined cellular and  
292 mitochondrial morphology of resting and LPS-activated splenic B cells by electron microscopy  
293 (Figure 7e). Resting DNT-expressing splenic B cells having already 10-fold reduced mtDNA  
294 (see Figure 1e) did not contain less mitochondria than controls and their shape did also not  
295 differ grossly, but they were less electron-dense, indicating a looser cristae structure (Figure  
296 7e, upper panel). This picture changed dramatically in LPS activated cells. We focused on  
297 activated B cells without obvious plasma cell morphology (compare Figure 7e, lower panel),

298 keeping in mind that in DNT-cultures only roughly 60% of CD138-expressing plasmablasts  
299 were GFP positive (Figure 6j) which hindered the unambiguous identification of DNT-  
300 expressing plasmablasts. Activated B cells from CRE mice contained a dense ER and  
301 homogeneously electron-dense mitochondria while B cells from DNT mice were very  
302 heterogeneous for both parameters (not shown). However, the LPS-activated DNT B cells had  
303 few mitochondria that were extremely large and had a very low electron density. The cristae  
304 structure was almost completely lost (Figure 7e, lower panel). Thus, resting B cells, which are  
305 metabolically rather quiescent, can maintain almost normal mitochondrial morphology with 10-  
306 fold decreased mtDNA in contrast to 3d LPS activated B cells.

307

### 308 **OxPhos is required for TCA flux in B cells**

309 Next, we determined how reduced mtDNA affects oxidative phosphorylation and TCA  
310 metabolism during B cell activation and plasma cell differentiation (Figure 8). Extracellular flux  
311 analyses of d3 LPS cultures revealed that basal and maximal oxygen consumption as well as  
312 ATP production coupled to respiration were reduced in DNT B cells, while basal ECAR,  
313 glucose consumption and lactate secretion were enhanced (Figure 8a-d), revealing increased  
314 glycolysis in the presence of oxygen. The same experiment performed with cells activated for  
315 6h showed that DNT-expressing cells performed OxPhos to a similar extent as controls  
316 although mtDNA was already depleted (see Figure 1) (Figure S5a). This suggested that  
317 mitochondrial function was still sufficient although loosening of cristae had already started  
318 (Figure 7e). In concordance with reduced OxPhos and ATP production linked to impaired  
319 respiration as measured by extracellular flux analyses (Figure 8b), we observed less ATP  
320 content in 3d LPS stimulated cells by luminometry (Figure 8, e). In contrast to the reduced  
321 mtDNA content already in resting splenic B cells but in accordance with the OxPhos  
322 measurements and mitochondrial morphology (Figure 1, Figure 7e and Figure S5a), ATP was  
323 not reduced in resting DNT B cells and even those cells were able to increase their intracellular  
324 ATP content upon activation (Figure 8e). This indicates compensatory pathways for ATP

325 production, most probably glycolysis, which was increased in DNT-expressing B cells, but also  
326 hyper induction of mitochondrial biogenesis (Haumann et al., 2020).

327 The mtRC and the tricarboxylic acid cycle (TCA) are intertwined (Kennedy and Lehninger,  
328 1949). Our data suggested that the mtRC is important for plasmablast differentiation during an  
329 anabolic phase in TACI<sup>+</sup> cells. Hence, we measured glycolytic and TCA intermediates by liquid  
330 chromatography mass spectrometry (LC-MS) in d3 LPS cultures (Hofmann et al., 2011)  
331 (Figure 8 f, g; Figure S5b). The reduction of ATP (Figure 8b, e) was again confirmed by this  
332 approach. Moreover, in line with the extracellular glucose measurements (Figure 8d),  
333 intracellular glucose was slightly increased together with erythrose-4-phosphate (E4P).  
334 Phosphoenolpyruvate (PEP) and uridine diphosphate N-acetylglucosamine (UDPNAG) were  
335 less abundant. We found reduced metabolites upstream of succinate dehydrogenase (SDH) -  
336 citrate, isocitrate, itaconate - but an accumulation of the TCA metabolites fumarate and malate  
337 downstream of SDH, the only mtRC complex whose subunits are not encoded by mtDNA  
338 (Gustafsson et al., 2016) (Figure 8 f, g; Figure S5b, c). Altogether, these data suggest that B  
339 cells with a dysfunctional mtRC divert the TCA cycle and utilize glucose to supply the PPP  
340 similar to many tumor cells with mitochondrial dysfunction, thus explaining their initial ability to  
341 survive and sustain proliferation.

342

### 343 **The mitochondrial respiratory chain in plasmablasts coordinates lipid synthesis and** 344 **MTOR activity**

345 Succinate, fumarate and malate can inhibit prolyl hydroxylase domain (PHD)-containing  
346 enzymes that normally target the von Hippel-Lindau protein (vHL) which ubiquitinylates  
347 hypoxia inducible factor 1 $\alpha$  (HIF1 $\alpha$ ), leading to its degradation (Harnoss et al., 2015; Martinez-  
348 Reyes and Chandel, 2020). Our metabolic analyses showed reduced ratios of  $\alpha$ -ketoglutarate  
349 to fumarate and malate, indicating a pseudo-hypoxic state (Shanmugasundaram et al., 2014)  
350 (Figure S5b). In accordance, we observed a stabilization of HIF1 $\alpha$  in DNT B cells at d3 of LPS

351 stimulation under normoxic conditions (Figure 9a, b). The increased HIF1 $\alpha$  protein abundance  
352 suggested increased reductive decarboxylation of  $\alpha$ -ketoglutarate to citrate and the generation  
353 of long chain acylcarnitines (Xu et al., 2019), but our measurements indicated that citrate was  
354 not increased (Figure 8 f, g). Therefore, we reasoned that the driving force of the intact SDH  
355 complex II shifts the equilibrium of the TCA cycle away from citrate generated through  
356 reductive carboxylation of  $\alpha$ -ketoglutarate towards the conversion of  $\alpha$ -ketoglutarate to  
357 succinate (see Figure S5 for illustration). This would increase HIF1 $\alpha$  abundance without  
358 concomitantly increasing citrate. Since HIF1 $\alpha$  normally increases lipid synthesis in B cells via  
359 citrate (Xu et al., 2019), *de novo* lipid biosynthesis should be altered in DNT-expressing B cells.  
360 To investigate this issue, we performed lipidomic analyses of d3 LPS blasts (Kumar et al.,  
361 2015) (a representative mass spectrum is shown in Figure 9c). We observed a specific  
362 reduction of total phosphatidic acid (PA) (Figure 9d) but no major quantitative differences for  
363 phosphatidylglycerol (PG), phosphatidylinositol (PI), phosphatidylethanolamine (PE),  
364 phosphatidylcholine (PC) and phosphatidylserine (PS) (Figure 9d). Regarding the length and  
365 saturation of FA there were no obvious differences for PG. Nonetheless, there were  
366 remarkable differences for PA, PC, PI, PE and PS. Most dramatically, GPL species with short-  
367 chain and saturated or monounsaturated FAs such as 32:0, 34:0, 32:1 or 34:1 were reduced  
368 within the pools of PA, PI, PE and PS, with the exception of 30:0, 32:0 or 32:1 PC (Figure S6).  
369 Although we did not detect statistical differences for all longer FA chains, GPLs with long-  
370 chain, polyunsaturated ones such as 36:3-36:7 or 40:3-40:7 were increased continuously  
371 regardless of the headgroup (Figure S6). Since so many GPL species with polyunsaturated  
372 FAs - except within the class of PGs - were increased, we consider this effect cumulatively to  
373 be biologically relevant. While we detected higher levels of species with long-chain and  
374 polyunsaturated FAs within the pools of almost all GPL classes, PA was the only overall  
375 quantitatively reduced GPL class (Figure 9d). PA is a central precursor for many lipids, acts  
376 directly on MTOR (Menon et al., 2017) and is required for assembly and stability of MTOR  
377 complexes (Foster, 2013). MTOR in turn is required for plasma cell development (Jones et al.,  
378 2016). Hence, the reduced PA abundance in DNT-expressing B cells suggested that MTOR is

379 activated less efficiently, which could explain the defective plasma cell development. In fact,  
380 phosphorylation of the ribosomal protein RPS6 (pRPS6), which is a substrate of the MTOR  
381 activated p70RPS6 kinase (Iwata et al., 2017), was reduced in DNT expressing LPS blasts at  
382 d2 and d3, but not at d1, while it was completely absent in resting cells (Figure 9a, e, f).  
383 Reduced MTOR activity could be a consequence of increased AMP activated kinase (AMPK)  
384 activity (Iwata et al., 2017; Tellier et al., 2016), which is activated by an increased AMP vs. ATP  
385 ratio. Corroborating our AMP and ATP measurements (Figure 8b, e-g), pAMPK was increased  
386 at d3 resulting in an elevated pAMPK vs. pRPS6 ratio in DNT-expressing B cells (Figure 9b,  
387 Figure S7). To assess MTOR activity kinetically we tracked pRPS6 over 3d of LPS activation  
388 (Figure 9e). Consistent with the immunoblot analyses (Figure 9a), flow cytometry revealed that  
389 RPS6 was less phosphorylated in 48h and 72h LPS activated DNT B cells (Figure 9e, f).  
390 Together, our data suggest that elevated AMPK activity and/or reduced PA abundance  
391 suppress MTOR in activated B cells.

### 392 **Phosphatidic acid increases OxPhos-dependent MTOR activity in LPS activated B cells**

393 Consequently, we tested the hypothesis that the lower abundance of PA in d3 DNT LPS blasts  
394 is responsible for suppressed MTOR activity. To this end, we added PA liposomes to LPS  
395 activated DNT blasts (Figure 9e-g; Figure S8). Addition of palmitic-acid-containing PA (32:0),  
396 which was reduced the most (Figure 9c, d; Figure S6), for 24h to LPS activated B cells  
397 increased the frequency of pRPS6 expressing cells in DNT B cells and controls similarly after  
398 24h (Figure 9e-g). Nevertheless, there was no significant PA induced phosphorylation of RPS6  
399 in DNT expressing B cells, showing that PA mediated mTOR activation requires a functional  
400 mtRC. PRPS6 increased further after 48h in LPS activated control B cells independently from  
401 PA addition but declined in DNT expressing B cells. After 72h PRPS6 also declined in the  
402 control cells (Figure 9a, e-g). These data show 1) that MTOR activity is only transiently  
403 elevated in LPS activated B cells, 2) that induction of MTOR via PA is only effective within the  
404 first 24 of B cell activation and 3) that induction of MTOR via PA in B cells depends on OxPhos.  
405 We propose an integrated model featuring a positive feedback loop between mitochondria and

406 the nucleus that controls plasma cell generation (Figure 10). OxPhos, which requires  
407 continuous replication and transcription of mtDNA, drives the TCA cycle to generate PA,  
408 leading to MTOR activation and BLIMP1 induction. BLIMP1 then induces expression of  
409 OxPhos genes encoded in the nucleus, further increasing OxPhos in a progressive manner.

410

## 411 **Discussion**

412 Here we describe selection checkpoints for mitochondrial function during B cell maturation,  
413 activation and plasma cell differentiation using depletion of mtDNA via CD23CRE-mediated  
414 expression of a dominant negative version of the mitochondrial helicase TWINKLE (DNT)  
415 coupled to IRES-GFP (Baris et al., 2015; Holzer et al., 2019; Weiland et al., 2018). The original  
416 human TWINKLE mutant, K319E, causes severe neurological problems (Hudson et al., 2005)  
417 but no data regarding humoral immunity are available. We show that MZ B cells and plasma  
418 cells contain the highest copy number of mtDNA within the B cell lineage, and that B cell  
419 activation is accompanied by increasing mtDNA. In line, the GC reaction, CSR, plasmablast  
420 and plasma cell development depend on sufficient copies of mtDNA. MZ B cell development  
421 was only slightly affected. Proportional to the highest mtDNA copy number plasma cells were  
422 most vulnerable to mtDNA depletion. In the plasma cell population as well as in the GC B cell  
423 population, GFP expressing cells become outcompeted by B cells that had escaped CD23CRE  
424 mediated excision of the STOP cassette. With regard to FO B cells our data support the finding  
425 that B cells do not require optimal expression of mitochondrial complex I, III, and IV proteins  
426 for their development (Milasta et al., 2016). In contrast to the work of Milasta et al., who  
427 conditionally deleted AIF1 (Milasta et al., 2016), we show that plasma cell development and  
428 function do depend on OxPhos. This contrast may be explained similar to our findings by the  
429 speculation that some B cells may also have escaped genetic recombination of the AIF1 locus  
430 (Milasta et al., 2016) and filled up the plasma cell compartment. We propose that the relative  
431 amount of mtDNA predicts the dependence of a given subpopulation on mtDNA, i.e. OxPhos  
432 activity. Hence, quantifying the mtDNA content of human B cell populations in health and



433 disease will be important. Our data indicate that DNT expression by CD23CRE occurs in  
434 transitional B cells and consequently we found reduced mtDNA in resting FO B cells but no  
435 effect on their development. The amount of mtDNA does not increase in GC B cells albeit  
436 those cells as well as resting FO B cells are supported by mitochondrial FA metabolism (Caro-  
437 Maldonado et al., 2014; Weisel et al., 2020). Since GC B cells are the most rapidly dividing  
438 cells in the mammalian body (MacLennan, 1994) we conclude that cell proliferation in GC is  
439 accompanied by replication of mtDNA to ensure that the mtDNA content remains at least  
440 constant. While there are conflicting data concerning the role of hypoxia and OxPhos within  
441 the GC (Boothby and Rickert, 2017; Jellusova et al., 2017; Weisel et al., 2020), it should be  
442 noted that GC B cells are a heterogeneous population (Ise et al., 2018; Victora et al., 2010).  
443 Different metabolic requirements feeding back on one another may be required for GC B cell  
444 entry, progression, and exit (Ersching et al., 2017). We have not yet determined at which GC  
445 stage mtDNA replication is most important. Nonetheless, our results show that mitochondrial  
446 fitness determined by a functional respiratory chain, which requires continuous replication and  
447 translation of mtDNA, constitutes a bottleneck of B cell selection within the GC, by controlling  
448 GC B cell expansion and generation of antigen-specific IgG secreting plasma cells.

449 Unexpectedly, we found that DNT-expressing B cells proliferate initially well and show even  
450 slightly increased survival rates when activated by LPS or LPS/CD40/IL-4/IL-5/TGF $\beta$ /retinoic  
451 for 3 and 4 days although mtDNA copy number was ~10 fold reduced and the mitochondrial  
452 cristae structure appeared already less dense. This was surprisingly paralleled by normal  
453 OxPhos and unaltered MTOR activity at d1 but less activity at d2 and d3. These data are  
454 consistent with reciprocally increased AMPK activity since AMPK inhibits MTOR and promotes  
455 mitochondrial function and quality in B cells (Brookens et al., 2020). Moreover, the reduced  
456 AMP/ATP ratio observed in the metabolomic analyses is consistent with increased AMPK  
457 activity. We conclude that one important function of OxPhos up-regulation in proliferating B  
458 cells is suppression of AMPK activity. These data are in accordance with original proposals  
459 linking the TCA, AMPK and MTOR (Tokunaga et al., 2004) and can indirectly also explain the  
460 effects on CSR and the GC reaction, both of which are controlled by MTOR and sustained

461 proliferation (Chiu et al., 2019; Ersching et al., 2017; Keating et al., 2013; MacLennan, 1994;  
462 Stavnezer et al., 2008; Zhang et al., 2013). In line, AMPK has previously been shown to control  
463 the GC reaction (Lee et al., 2017; Waters et al., 2019). Our data are also consistent with DNT-  
464 mediated activation of AMPK in primary cultured chondrocytes (Holzer et al., 2019). Of note,  
465 AMPK activity is associated with aged, self-reactive and pro-inflammatory, CD21<sup>+</sup>CD23<sup>-</sup> double  
466 negative (DN) B cells (Frasca et al., 2019). Along with the reduced IL-10 secretion we observed  
467 after LPS stimulation this might indicate a pro-inflammatory effect of DNT expression in B cells,  
468 an issue that deserves further investigation. Jang et al. have proposed that increased  
469 mitochondrial mass and ROS in activated B cells support CSR (Jang et al., 2015).  
470 Counterintuitively, Haumann et al. showed recently that mtDNA mutations induce a retrograde  
471 signaling pathway that actually increases mitochondrial biogenesis, thereby, increasing  
472 metabolic fitness and the tumourigenic potential of Reed-Sternberg cells (Haumann et al.,  
473 2020). One of the retrograde pathways inducing mitochondrial biogenesis (Haumann et al.,  
474 2020) could be the catabolic AMPK pathway (Brookens et al., 2020) that is elevated in DNT  
475 expressing B cells.

476 An exceptional advantage of our experimental model is the circumvention of unspecific and  
477 toxic inhibitors of OxPhos or glycolysis *in vivo*. This enabled us to analyze TD immunizations,  
478 revealing a very strong B cell intrinsic requirement of OxPhos during the TD NP-specific IgG  
479 response. The reduced basal IgG and the reduced immunization induced NP-specific IgG may  
480 represent a cumulative consequence of crippled GC reactions and CSR. Since we observed a  
481 drop in GFP – i.e. DNT – expression between the GC stage and BM plasma cells we propose  
482 a metabolic checkpoint during post-GC plasma cell development and/or survival. This proposal  
483 is supported by our *in vitro* data, albeit those were obtained in short-term cultures with TI  
484 stimulation. Additional strong support for the concept of a disadvantage of B cells with reduced  
485 OxPhos during TD-induced plasma cell generation is provided by the fact that GFP-expressing  
486 cells are excluded from the population of NP-specific plasma cells. We explain this by the  
487 expansion of GFP negative, NP-specific plasma cells identified by TACI/CD138 staining  
488 (Pracht et al., 2017) in NP-KLH immunized DNT mice. Like in classical GC defects such as

489 during CD40/CD40L or activation-induced deaminase (AID) deficiency, the IgM expressing  
490 plasma cells, in our setting WT cells, may over-compensate (Durandy and Honjo, 2001) and  
491 may even secrete more Ab. Along this line, oligomycin, an inhibitor of ATP synthase, has been  
492 shown to reduce Ab secretion in LPS blasts (Price et al., 2018), albeit the concentrations that  
493 had been used are unclear. Another factor that may come into play is Ig catabolism, which is  
494 proportional to Ig abundance (Morell et al., 1970; Waldmann and Strober, 1969). Ab half-life  
495 may possibly be prolonged in DNTxCD23CRE mice.

496 Price et al. have revealed a progressive up-regulation of OxPhos accompanying plasma cell  
497 generation towards the TI antigen LPS through BLIMP1-controlled expression of OxPhos  
498 genes (Price et al., 2018). In contrast, other groups have shown that BLIMP1 reduces  
499 mitochondrial mass and mitochondrial reactive oxygen species (Jang et al., 2015). The survival  
500 of plasma cells in the BM, defined as CD138<sup>+</sup>B220<sup>low</sup> (Lam et al., 2016), appears to require  
501 mitochondrial pyruvate import to prevent bioenergetic crises. Our data support the model that  
502 the generation BM plasma cells (compare GFP expression between plasma cell subsets from  
503 spleen and BM), require a functional mtRC fueled by the TCA cycle. Pyruvate is essential to  
504 generate citrate and consequently lipids. Based on the relative distribution of TCA metabolites  
505 in DNT expressing LPS blasts we hypothesized that the reduced citrate affects LPAAT  
506 pathway (Foster et al., 2014). In that sense, the reduced OxPhos in LPS activated B cells  
507 lowered the total abundance of PA, in particular PA species with saturated FAs, and shifted  
508 the overall equilibrium to GPLs with polyunsaturated fatty acyl chains. This can be expected  
509 to alter membrane dynamics and may explain the large side scatter of late DNT blasts  
510 (Tokumasu et al., 2009). One reason for decreased saturated GPLs could be facilitated  $\beta$ -  
511 oxidation (Schulz, 2008), a process that is also supported by AMPK (Garcia and Shaw, 2017).  
512 While addition of PA was able to enhance MTOR activity within the first 24h after activation, it  
513 did not at later timepoints. The effect of PA may depend on the cellular differentiation status,  
514 for instance, at later timepoints activated AMPK could restrict the PA effect. We used saturated  
515 palmitic-acid-containing PA (32:0) because this species was reduced the most in LPS-elicited  
516 DNT-blasts. Others have reported that only PA containing one unsaturated FA can activate

517 MTOR (Yoon et al., 2015). The saturated PA may have been effective in our hands because  
518 we have used primary mouse B cells instead of transformed and adherent human cells. It has  
519 been proposed that the responsiveness of MTOR to PA evolved to sense lipid precursors for  
520 membrane biosynthesis prior to doubling the mass of a cell and cell division (Foster, 2013).  
521 We envision a similar function for MTOR in B cells. This would be in analogy to its function in  
522 T cell priming (Angela et al., 2016) and with the observation that MTOR is required during early  
523 steps of plasma cell differentiation by priming the endoplasmic reticulum for increased protein  
524 synthesis (Gaudette et al., 2020). In accordance, we observed numerous alterations in the lipid  
525 composition of DNT-expressing B cells, explaining why PA activates mTOR better in B cells  
526 with intact OxPhos. Although we are far from fully understanding the biological significance of  
527 the complex alterations in phospholipids, two issues deserve further investigation: Firstly, and  
528 as already discussed, the precise lipid-mediated mechanism of the regulation of MTOR activity  
529 in B cells. Secondly, the regulation of mitochondrial fission by Dynamin-like protein 1 (DRP1),  
530 which binds simultaneously to the polar headgroup of PA and to the acyl chains of other  
531 membrane phospholipids (Adachi et al., 2016). Indeed, mitochondria were enlarged in the  
532 DNT-expressing LPS blasts and it is tempting to speculate that this is due to missing action of  
533 DRP1. Our data obtained in LPS blasts, which are short-lived, may not completely reflect the  
534 metabolism of long-lived plasma cells but we clearly observe similar effects *in vitro* and during  
535 TD immune responses *in vivo*. Unless it is feasible to obtain sufficient numbers of long-lived  
536 plasma cells, for instance through *in vitro* cultivation systems (Cocco et al., 2012; Cornelis et  
537 al., 2020), LPS blasts serve to establish working hypotheses.

538 Many tumour cells feature defective mitochondrial respiration and rely on reductive  
539 carboxylation of glutamate to produce citrate (Mullen et al., 2011). Unlike tumour cells where  
540 the mtRC complexes are stochastically mutated, the B cells expressing DNT do have a fully  
541 functional complex II, the SDH complex, because no subunit of SDH is encoded by mtDNA  
542 (Gustafsson et al., 2016). We envision that the intact complex II is the driving enzymatic  
543 reaction in the TCA cycle of DNT B cells due to loss-of-function mutations in the other  
544 complexes. The shifts the equilibrium to more downstream (fumarate, malate) and less

545 upstream metabolites (citrate, isocitrate, itaconate,  $\alpha$ -ketoglutarate). Henceforth, less citrate  
546 can be used for FA synthesis and PA generation, the ratio of  $\alpha$ -ketoglutarate to fumarate and  
547 malate is lowered in DNT B cells, which disfavors PHD activation (for review see (Martinez-  
548 Reyes and Chandel, 2020) and causes stabilization of HIF1 $\alpha$  in DNT LPS blasts at d3.  
549 Although we have not shown this directly, our results are consistent with a role of glutamine in  
550 supporting mitochondrial respiration and anaplerotic reactions in the TCA cycle of  
551 plasmablasts (Lam et al., 2018).

552 Essentially, we provide a causal relation between OxPhos and plasma cell differentiation *in*  
553 *vivo* and in primary B cell cultures *in vitro* and place OxPhos mediated generation of TCA  
554 intermediates upstream of BLIMP1 and XBP1. This proposal stands in contrast to data showing  
555 that hypoxia increases IgG1 class switch and plasma cell differentiation (Abbott et al., 2016).  
556 The discrepancy may be due to the fact that our concept is based on data obtained in a B cell  
557 intrinsic manner. We propose a positive feedback loop between mtDNA controlled OxPhos  
558 and BLIMP1 mediated expression of nuclear OxPhos genes that ensures selection for  
559 mitochondrial fitness during plasma cell generation (Figure 10): the initial increase in OxPhos  
560 (Caro-Maldonado et al., 2014) drives the TCA cycle to generate PA and ATP, leading to  
561 inhibition of AMPK, activation of MTOR and subsequent BLIMP1 expression (Brookens et al.,  
562 2020; Gaudette et al., 2020; Jones et al., 2016). This occurs in activated, TACI<sup>+</sup> B cells not yet  
563 expressing CD138. The higher the TCA cycle flux is, the more PA is generated, and the more  
564 BLIMP1 is expressed. BLIMP1 induces expression of OxPhos genes encoded in the nucleus,  
565 further increasing OxPhos in a progressive manner (Price et al., 2018). This model could also  
566 explain how BLIMP1 is able to sustain MTOR activity (Tellier et al., 2016), namely via OxPhos  
567 and the TCA cycle.

568 In conclusion, we identify here checkpoints for mitochondrial fitness during B cell activation  
569 and plasma cell differentiation. Functional OxPhos, which requires the continuous replication  
570 and transcription of mtDNA, prevents AMPK activation, and supplies the cell with TCA  
571 intermediates needed for MTOR activity and humoral immunity.

572

573 **Acknowledgements**

574 This work was funded by the Deutsche Forschungsgemeinschaft (DFG; transregional  
575 collaborative research grant TRR130 and DFG Research training grant 1660, to D.M.). O.R.B.  
576 and R.J.W. were supported by the Deutsche Forschungsgemeinschaft (DFG; SFB 829/A14  
577 and Cologne Excellence Cluster on Cellular Stress Responses in Aging-associated Diseases  
578 – CECAD).

579

580 **Declaration of interests**

581 The authors declare no competing financial interests.

582

583 **Author contributions**

584 S.U., O.R.B., F.G., U.S-S., J.H., S.B., W.S., T.S. performed experiments. S.U. and D.M.  
585 designed the study. S.U., F.G., U.S-S., J.H., S.B., R.W. and D.M. analyzed data. S.R.S.  
586 performed bioinformatics analyses. S.U., R.W. and D.M. wrote the paper. D.Mo., U.S., K.C.  
587 and R.W. provided intellectual and infrastructural help.

588

589 **KEY RESOURCES TABLE**

| REAGENT or RESOURCE                     | SOURCE         | IDENTIFIER      |
|-----------------------------------------|----------------|-----------------|
| <b>Antibodies</b>                       |                |                 |
| Anti CD16/32, clone 93                  | Biolegend      | # 101302        |
| Anti TACI/CD267 (APC, clone eBio8F10-3) | eBioscience    | Cat# 17-5942-82 |
| Anti CD19 (APCFire750, clone 6D5)       | Biolegend      | Cat# 115558     |
| Anti CD38 (PerCPCy5.5, clone 90)        | Biolegend      | Cat# 102722     |
| Anti CD138 (PECy7, clone 281-2)         | Biolegend      | Cat# 142513     |
| Anti CD8a, (APC, clone 53-6.7)          | ebioscience    | Cat# 17-0081    |
| Anti CD4 (PE, clone gk1.5)              | ebioscience    | Cat# 12-0043-82 |
| Anti GL-7 (AF647, clone GL-7)           | BD Biosciences | Cat# 561529     |
| Anti CD95 (PECy7, clone Jo2),           | BD Biosciences | Cat# 554254,    |

|                                                                    |                         |                  |
|--------------------------------------------------------------------|-------------------------|------------------|
| Anti CD21/35 (BV421, clone 7E9)                                    | Biologend               | Cat# 123421      |
| Anti CD23 (PE, clone B3D4)                                         | eBioscience             | Cat# 12-0232-82  |
| Anti IgM (PE)                                                      | Southern Biotech        | Cat# 1021-09     |
| Anti IgA (AF647)                                                   | Southern Biotech        | Cat# 1040-31     |
| Anti IgG (Cy5)                                                     | Southern Biotech        | Cat# 1030-15     |
| Anti GL7 (Pacific Blue)                                            | Biologend               | Cat# 144613      |
| Anti IgD (AF647)                                                   | Southern Biotech        | Cat# 1120-31     |
| Anti PNA (Rhodamine)                                               | Vector                  | Cat# RL-1072     |
| Anti BLIMP1 (PE, clone 567)                                        | eBioscience             | Cat# 12-9850-82  |
| Anti Phospho-S6 Ribosomal Protein (Ser235/236) (PE, clone cupk43k) | eBioscience             | Cat# 12-9007-42  |
| Goat anti mouse IgM-HRP                                            | Southern Biotech        | Cat# 1021-05     |
| Goat anti mouse IgG-HRP                                            | Southern Biotech        | Cat# 1030-05     |
| Goat anti-IgM AffiniPure F(ab') <sub>2</sub> $\mu$ chain specific  | Jackson ImmunoResearch  | Cat# 115-006-020 |
| Anti CD40, clone FGK45,                                            | Rolink et al., 1996     |                  |
| Anti IRF4 (unlabeled, clone P173)                                  | Cell Signaling          | Cat# 4948        |
| Anti BLIMP1 (unlabeled, clone 6D3)                                 | Santa Cruz              | Cat# sc-47732    |
| Anti Actin (unlabeled)                                             | Sigma-Aldrich           | Cat# A2066       |
| Anti XBP1 (unlabeled)                                              | Cell Signaling          | Cat# 12782S      |
| Anti HIF1a (unlabeled)                                             | Cayman                  | Cat# 10006421    |
| Anti Phospho-S6 Ribosomal Protein (Ser235/236) (unlabeled)         | Cell Signaling          | Cat# 2211S       |
| Anti Phospho-AMPK $\alpha$ (Thr172) (unlabeled)                    | Cell Signaling          | Cat# 2535S       |
| Anti TWINKLE (unlabeled)                                           | Abcam                   | Cat# 187517      |
| <b>Bacterial and Virus Strains</b>                                 |                         |                  |
| N/A                                                                |                         |                  |
| <b>Biological Samples</b>                                          |                         |                  |
| N/A                                                                |                         |                  |
| <b>Chemicals, Peptides, and Recombinant Proteins</b>               |                         |                  |
| 4-Hydroxy-3-nitrophenylacetyl (Phycoerythrin)                      | Biosearch Technologies. | Cat# N-5070      |

|                                                           |                                |                  |
|-----------------------------------------------------------|--------------------------------|------------------|
| 4-Hydroxy-3-nitrophenylacetyl (keyhole limpet hemocyanin) | Biosearch Technologies.        | Cat# N-5060      |
| 4-Hydroxy-3-nitrophenylacetyl (bovine serum albumin)      | Biosearch Technologies.        | Cat# N-5050      |
| Cell Proliferation Dye eFluor 450                         | eBioscience                    | Cat# 65-0842-85  |
| Imject Alum                                               | Thermo Fisher                  | Cat# 77161       |
| Poly-L-Lysine                                             | Sigma                          | Cat# P8920       |
| Interleukin-4, premium grade                              | Miltenyi Biotech               | Cat# 130-097-761 |
| SYBR Green PCR Master Mix                                 | ThermoFisher                   | Cat# 4309155     |
| Fatty acid free BSA                                       | Sigma                          | Cat# A8806       |
| 1,2-dipalmitoyl-sn-glycero-3-phosphate (16:0 PA)          | Avanti                         | Cat# 830855P     |
| <b>Critical Commercial Assays</b>                         |                                |                  |
| EasySep B cell isolation kit                              | Stem Cell Technologies         | Cat# 19854       |
| Mouse IL-10 DuoSet ELISA                                  | R&D Systems                    | Cat# DY417       |
| ATP Bioluminescence Assay Kit HS II                       | Roche                          | Cat# 11699709001 |
| Annexin-V APC Apoptosis Detection Kit                     | eBioscience                    | Cat# 88-8007-72  |
| DNeasy Blood & Tissue Kit                                 | Quiagen                        | Cat# 69504       |
| <b>Deposited Data</b>                                     |                                |                  |
| N/A                                                       |                                |                  |
| <b>Experimental Models: Cell Lines</b>                    |                                |                  |
| N/A                                                       |                                |                  |
| <b>Experimental Models: Organisms/Strains</b>             |                                |                  |
| R26-K320E-TWINKLE loxP+/-                                 | Baris et al., 2015             |                  |
| Tg(Fcer2a-cre)5Mbu                                        | Kwon et al., 2008              |                  |
| <b>Oligonucleotides</b>                                   |                                |                  |
| 16s rRNA fwd<br>CCGCAAGGGAAAGATGAAAGAC                    | Invitrogen, Quiros et al. 2017 |                  |
| 16s rRNA rev<br>TCGTTTGGTTTCGGGGTTTC                      | Invitrogen, Quiros et al. 2017 |                  |



|                                     |                                |                                                                                                                                                                                                                                                                                         |
|-------------------------------------|--------------------------------|-----------------------------------------------------------------------------------------------------------------------------------------------------------------------------------------------------------------------------------------------------------------------------------------|
| HK2 fwd<br>GCCAGCCTCTCCTGATTTTAGTGT | Invitrogen, Quiros et al. 2017 |                                                                                                                                                                                                                                                                                         |
| HK2 rev<br>GGGAACACAAAAGACCTCTTCTGG | Invitrogen, Quiros et al. 2017 |                                                                                                                                                                                                                                                                                         |
| <b>Recombinant DNA</b>              |                                |                                                                                                                                                                                                                                                                                         |
| N/A                                 |                                |                                                                                                                                                                                                                                                                                         |
| <b>Software and Algorithms</b>      |                                |                                                                                                                                                                                                                                                                                         |
| GraphPad Prism                      | Graphpad                       | <a href="https://www.graphpad.com/scientific-software/prism/">https://www.graphpad.com/scientific-software/prism/</a>                                                                                                                                                                   |
| Seahorse Wave Desktop Software      | Agilent                        | <a href="https://www.agilent.com/en/product/cell-analysis/real-time-cell-metabolic-analysis/xf-software/seahorse-wave-desktop-software-740897">https://www.agilent.com/en/product/cell-analysis/real-time-cell-metabolic-analysis/xf-software/seahorse-wave-desktop-software-740897</a> |
| Kaluza                              | Beckman Coulter                | <a href="https://www.beckman.de/flow-cytometry/software/kaluza">https://www.beckman.de/flow-cytometry/software/kaluza</a>                                                                                                                                                               |
| R & Pheatmap Plugin                 |                                | <a href="https://www.r-project.org/">https://www.r-project.org/</a> ; (Kolde, 2015)                                                                                                                                                                                                     |
| <b>Other</b>                        |                                |                                                                                                                                                                                                                                                                                         |
| Sheep red blood cells               | Fiebig Nährstofftechnik        | Cat# 31100100                                                                                                                                                                                                                                                                           |

590

591 **STAR methods**

592 **Resource Availability**

593 **Lead Contact**

594 Further information and requests for resources and reagents should be directed to and will be  
 595 fulfilled by the Lead Contact Dirk Mielenz ([dirk.mielenz@fau.de](mailto:dirk.mielenz@fau.de))

596 **Materials Availability**

597 All unique reagents generated in this study are available from the Lead Contact.

598 **Data and Code Availability**

599 This study did not generate new resource datasets or code.

600 **Experimental Model and Subject Details**

601 **Animal models**

602 All experimental procedures were done in agreement with animal protocols approved by the  
603 Government of Lower Franconia, Bavaria, Germany. Both female and male mice were used in  
604 the experiments. Mice were maintained on a 12-h light/dark cycle with free access to food and  
605 water according to governmental rules. All mice were in C57BL/6 backgrounds and between  
606 8-12 weeks old. Sex-matched littermates or age and sex matched animals were used as  
607 controls. Mice were kept under pathogen free conditions in the mouse facility of the Nicolaus-  
608 Fiebiger-Center (Erlangen, Germany).

609

610 **Materials & Methods**

611 **Glycerophospholipid analysis**

612 Glycerophospholipids (PC, PE, PI, PS, PG, PA) in B cells were analyzed by Nano-Electrospray  
613 Ionization Tandem Mass Spectrometry (Nano-ESI-MS/MS) with direct infusion of the lipid  
614 extract (*Shotgun Lipidomics*): 14 to 45 x 10<sup>6</sup> cells were homogenized in 300 µl of Milli-Q water  
615 using the Precellys 24 Homogenisator (Peqlab, Erlangen, Germany) at 6.500 rpm for 30 sec.  
616 The protein content of the homogenate was routinely determined using bicinchoninic acid.  
617 To 100 µl of the homogenate 400 µl of Milli-Q water, 1.875 ml of methanol/chloroform 2:1 (v/v)  
618 and internal standards (125 pmol PC 17:0-20:4, 132 pmol PE 17:0-20:4, 118 pmol PI 17:0-  
619 20:4, 131 pmol PS 17:0-20:4, 62 pmol PG 17:0/20:4, 75 pmol PA 17:0/20:4 Avanti Polar Lipids)  
620 were added. Lipid extraction and Nano-ESI-MS/MS analysis were performed as previously

621 described (Kumar et al., 2015). Endogenous glycerophospholipids were quantified by referring  
622 their peak areas to those of the internal standards. The calculated glycerophospholipid amounts  
623 were normalized to the protein content of the tissue homogenate.

#### 624 **Mice**

625 K320E-TWINKLE floxed mice (Baris et al., 2015) were crossed to CD23 CRE mice (Kwon et  
626 al., 2008) (kindly provided by Meinrad Busslinger) to generate DNT animals. DNT mice used  
627 in these experiments had the genetic background DNT<sup>+/-</sup> CRE<sup>+/-</sup> and CRE control mice were  
628 DNT<sup>-/-</sup> CRE<sup>+/-</sup>. The WT animals used in this study were DNT<sup>-/-</sup> CRE<sup>-/-</sup> littermates. All mice were  
629 on the C57Bl/6 background.

#### 630 **T-dependent immunizations**

631 Mice were injected with 100µg NP<sub>29</sub>-KLH (Biosearch Technologies) in Alum (ThermoScientific)  
632 in a 1:2 ratio (200µl total volume or in PBS after 6 weeks for boost immunization (*i.p.*).

#### 633 **Isolation of primary murine cells from spleen and bone marrow**

634 Spleen was transferred in cold 2% FCS (in PBS) and gently passed through a 70µm cell  
635 strainer (BD) using the plunger of a 5ml syringe (BD). Femur and tibia were flushed with cold  
636 2% FCS using a 27G cannula (BD). Cell suspensions were pelleted by centrifugation at 300xg  
637 for 5min at 4°C. Erythrocytes were lysed upon resuspension in red blood cell-lysis buffer  
638 (150mM NH<sub>4</sub>Cl, 10mM KHCO<sub>3</sub>, 100µM EDTA) for 5min at room temperature. The reaction was  
639 stopped by adding cold 2% FCS before centrifugation at 300xg for 5min at 4°C. The final cell  
640 suspensions were kept in cold 2% FCS after filtration through 30µm mesh filter (Sysmex).

#### 641 **Detection of surface antigens by flow cytometry**

642 2x10<sup>6</sup>- 4x10<sup>6</sup> cells were pelleted in FACS tubes (Micronic) at 300xg for 5min at 4°C and  
643 resuspended in 50µl of unlabeled anti-CD16/32 Ab (10µg/ml in FACS-buffer (PBS, 2%FCS,  
644 0.05% sodium azide)) for 15min on ice. Cells were washed once with FACS-buffer by  
645 centrifugation at 300xg for 5min at 4°C, resuspended in 50µl FACS-buffer containing the

646 respective fluorochrome-coupled Abs and incubated for 20min on ice in the dark. Cells were  
647 washed with FACS-buffer by centrifugation at 300xg for 5min at 4°C. Data were acquired using  
648 a Gallios flow cytometer (Beckman Coulter). Analyses were performed using Kaluza version  
649 1.3 and 2.1 (Beckman Coulter). Abs and other reagents are described in the key resources  
650 table.

### 651 **Enzyme-linked immunosorbent assay (ELISA)**

652 Serum samples from NP-KLH immunized mice (see above) were analyzed in duplicates  
653 serially diluted on 96-well flat-bottom microtiter plates (Greiner bio-one) coated with 1µg/ml  
654 NP<sub>4</sub>-BSA or NP<sub>20</sub>-BSA conjugates (Biosearch Technologies) in 50µl/well coating buffer (15mM  
655 Na<sub>2</sub>CO<sub>3</sub>, 35mM NaHCO<sub>3</sub>) overnight at 4°C. Captured NP-specific Abs were detected with goat  
656 anti-mouse IgM and IgG specific horseradish peroxidase (HRP) - coupled Abs (1:1000,  
657 Southern Biotech) and the ELISA was developed using TMB substrate reagent (BD OptEIA)  
658 and acid stop (0.5M H<sub>2</sub>SO<sub>4</sub>). Optical density (oD) was measured at 450nm on a FLUOstar  
659 Omega Microplate Reader (BMG Labtech) Plates were normalized using ELISA IgM and IgG  
660 standards as internal reference.

661 For analysis of serum from unimmunized mice and LPS culture supernatant, microtiter plates  
662 were coated with 1µg/ml goat anti-IgM/anti-IgG in coating buffer overnight at 4°C and then  
663 blocked for 1h at room temperature with 275µl/well of PBS, 2%FCS. Samples were analyzed  
664 in duplicates diluted serially 2-fold in PBS, 2%FCS for 1h at room temperature. Plates were  
665 washed 3 times with PBS, 0.05% Tween20 and then incubated with goat anti-mouse IgM-  
666 HRP/IgG-HRP in PBS, 2%FCS. After washing, plates were developed using developed using  
667 TMB substrate reagent (BD OptEIA) and acid stop (0.5M H<sub>2</sub>SO<sub>4</sub>). Optical density (oD) was  
668 measured at 450nm on a FLUOstar Omega Microplate Reader (BMG Labtech). Plates were  
669 normalized using ELISA IgM and IgG standards as internal reference.

670 ELISA for detection of IL10 in culture supernatant was performed using the Mouse IL-10  
671 DuoSet ELISA (R&D Systems) according to manufacturer's instructions.

### 672 **Western Blot**

673 Proteins were electrophoresed on 10% SDS polyacrylamide gels and transferred to a  
674 nitrocellulose membrane (45 min, 400 mA). Transfer efficiency was determined by Ponceau  
675 S. Membranes were blocked in 5% skimmed milk powder in Tris-buffered saline (TBS)  
676 containing 0.1% Tween-20 (TBST) and probed with the respective antibody at 4°C overnight  
677 diluted in 3% BSA in PBS, containing 0.1% Tween-20 and 0.1% Sodium Azide. Membranes  
678 were washed in TBST and incubated with anti-mouse/rabbit/rat IgG HRP conjugate diluted in  
679 5% skimmed milk powder in TBST for 1 hour at room temperature. After washing, blots were  
680 developed by enhanced chemiluminescence. Quantification of western blot bands was  
681 performed by densitometry analysis with ImageJ. Therefore, scanned X-ray films were  
682 converted to 8-bit type and color inverted. Band intensities were measured, and background  
683 of X-ray films was subtracted. Protein expression was normed to  $\beta$ -Actin as loading control.

#### 684 **Purification of murine B lymphocytes from spleen**

685 B cells were enriched from splenic cell suspensions using the EasySep Mouse B cell isolation  
686 negative selection kit (EasySep #19854, Stemcell Technologies) according to the  
687 manufacturer's instructions. In short, spleen cells were resuspended in MACS buffer (PBS, 2%  
688 FCS, 2mM EDTA), surface blocked with rat serum and immuno-magnetically enriched for B  
689 cells. Purity of isolated B cells was verified by surface stain for CD19. Usually, an enrichment  
690 of > 95% was achieved.

#### 691 ***In vitro* cultivation of primary murine B cells**

692 Splenic B cells were cultured with a starting concentration of  $0,5 \times 10^6$  cells/ ml in R10 medium  
693 (RPMI1640, 10% fetal calf serum (FCS), 2mM glutamate, 1mM sodium pyruvate, 50 U/ml  
694 penicillin G, 50 $\mu$ g/ml streptomycin, 50 $\mu$ M  $\beta$ -mercaptoethanol) for 72h at 37°C and 5% CO<sub>2</sub>,  
695 supplemented with 10 $\mu$ g/ml LPS. For *in vitro* class switch recombination cells were seeded at  
696  $0,1 \times 10^6$  cells/ ml in R10 medium for 96h, supplemented with 5ng/ml TGF beta, 5nM retinoic  
697 acid, 10 $\mu$ g/ml  $\alpha$ -CD40, 10 $\mu$ g/ml LPS, 100U/ml IL4 and 10ng/ml IL5.

#### 698 **Extracellular Flux Analysis**

699 The day prior to the assay cell plates were coated with 10µg/ml Poly-L-Lysine in 1x TE buffer.  
700 Day 3 LPS blasts were seeded at a density of  $2,5 \times 10^5$  cells/well, measured at least in  
701 triplicates. Mito Stress Test was performed according to manufacturer's instructions.

#### 702 **Intracellular ATP measurement**

703 Level of intracellular ATP of  $5 \times 10^4$  cells per sample was determined using the ATP  
704 Bioluminescence Assay Kit HS II (Roche) according to manufacturer's instructions.

#### 705 **DNA extraction and RT-qPCR**

706 Cell pellets were resuspended in PBS and DNA was isolated using the DNeasy Blood & Tissue  
707 Kit (Quiagen), according to manufacturer's instructions. qPCR was performed using SYBR  
708 Green I-dTTP (Eurogentec) using the Applied Biosystems 7500 real-time PCR system.  
709 Samples were analyzed in triplicates and 16s rRNA copies, representing mtDNA copies, were  
710 normalized to the HK2 gene.

#### 711 **Liposome production**

712 Liposome production was based on a recently published method (S. T. Poschenrieder, 2016)  
713 originally developed for the production of polymersomes, which are the artificial counterparts  
714 of liposomes. Here, 11.4 mL of vesicle buffer (10 mM TRIS-HCl, 150 mM NaCl, pH 8.0) were  
715 poured into unbaffled miniaturized stirred tank reactors (BioREACTOR48, 2mag, Munich,  
716 Germany) and stirred at 4,000 rpm at 25°C using an S-type stirrer. Then, 600 µL of the  
717 dissolved phospholipid 16:0 PA (1,2-dipalmitoyl-sn-glyero-3-phosphate) (10 mM in chloroform)  
718 were injected under stirring, leading to a whitish highly dispersed emulsion. The reactor shell,  
719 originally made of polystyrene, has been replaced by borosilicate glass, in order to avoid  
720 damaging by the chloroform. The process was continued, until the solution became  
721 transparent, indicating the evaporation of the chloroform, which was the case after 6 hours.  
722 Subsequently, the solution was centrifuged at 13,000 rpm in a tabletop centrifuge to remove  
723 precipitates. The liposomes in the supernatant were then concentrated to  $1,5 \text{ mg mL}^{-1}$  by  
724 centrifugation for 50 min at 50,000 g and resuspending of the resulting pellet in the appropriate

725 amount of vesicle buffer. The quality of the liposomes during and after the production process  
726 was monitored via dynamic light scattering using a Zetasizer NS (Malvern, Worcestershire,  
727 UK) as reported (S. T. Poschenrieder, 2016).

### 728 **Lactate and Glucose measurement of culture supernatant**

729 Supernatant of LPS activated B cells was harvested after 3 days and analyzed with the SUPER  
730 GL compact analyzer according to the manufacturer's instructions.

### 731 **Immunohistology**

732 Mice were immunized with SRBCs, sacrificed after 10 days and spleens were embedded in  
733 OCT medium (Tissue-Tek). Cryotome sections of 8 $\mu$ m were prepared, fixed in acetone,  
734 blocked (with 20  $\mu$ g/ml  $\alpha$ -CD16/23 in 1% PBS, 10% FCS, 2% BSA) and stained with  $\alpha$ -IgD-  
735 AF647, PNA-Rhodamine and  $\alpha$ -GL7-PacificBlue.

### 736 **Metabolomics**

737 Splenic B cells were isolated, activated with LPS and viable cells, only GFP<sup>+</sup> for DNT, were  
738 sorted after 3 days using flow cytometry. Perchloric acid extraction was performed and  
739 metabolic profiles as previously published (Hofmann et al., 2011).

### 740 **Electron microscopy**

741 Viable cells were collected by ficoll density gradient centrifugation and were fixed overnight in  
742 2.5% glutaraldehyde (Carl Roth, 4995.1) in PBS. Cells were further processed and analyzed,  
743 as described previously (Steinmetz et al., 2020).

### 744 **Quantification and statistical analysis**

745 Values were assessed for Gaussian distribution using the Shapiro-Wilk normality test. Mann-  
746 Whitney test was used for non-Gaussian distributed data sets. Datasets revealing Gaussian-  
747 like distribution were assessed by Student's t test. Differences between the analyzed groups  
748 were considered to be statistically significant with p-values <0.05. \*, p<0.05, \*\*, p < 0.01, \*\*\*,

749  $p < 0.002$ , \*\*\*\*,  $p < 0.0004$ . Data were analyzed using Prism (GraphPad) and R using the  
750 Pheatmap plugin (Kolde, 2015).

751

## 752 **Figures**

### 753 **Figure 1| Expression of mtDNA and genetic inhibition of mtDNA replication in murine** 754 **B cell subsets**

755 A, Relative abundance of mtDNA encoded *16s rRNA* normalized to nuclear DNA with *hk2* as  
756 reference gene in sorted B cell subsets of SRBC immunized mice.  $n = 4$ , mean  $\pm$  SEM. B,  
757 Splenic B cells were stimulated with LPS for 3 d. mtDNA abundance was assessed at given  
758 time points as described in A. C, Schematic of the construct encoding a dominant negative  
759 form of TWINKLE (K320E; DNT; (Baris et al., 2015) knocked into the *ROSA26* locus in the  
760 inactive conformation (upper) and after CRE mediated recombination (lower) with excised  
761 *neo/Stop* cassette (*neo* | WSS), activation of the composite CAG promoter (C,  
762 cytomegalovirus, A, chicken beta actin, G, rabbit beta globin) and expression of DNT and  
763 IRES-GFP. Expression of DNT impairs replication of mtDNA (right). D, Representative merged  
764 dot plots from splenic B cells from CD23CRE and DNT mice stained with antibodies against  
765 CD4, CD8 and CD19 and analyzed by flow cytometry. E, Splenic B cells from CD23CRE and  
766 DNT mice were stimulated with LPS for 3d and mtDNA was quantified on d0 and d3 as in A.  
767 Symbols represent individual mice.  $N=1$ ;  $n=4$ ; significance was calculated using 2-way  
768 ANOVA. Data for d3 are representative for 3 independent experiments.

769

### 770 **Figure 2| Quantification of B cell populations and serum antibodies in non-immunized** 771 **DNT mice.**

772 A, Representative flow cytometry dot plots (merged from 3 mice) of splenic B cells pregated  
773 on singlets, viable lymphocytes and B cells (CD19<sup>+</sup>) from CD23CRE and DNT mice with anti



774 CD21 and anti CD23 antibodies, B, Representative flow cytometric analysis of germinal center  
775 (GC) B cells in the peyer's patches from CD23CRE and DNT mice pregated on singlets and  
776 viable lymphocytes stained with anti CD19, CD38, GL7 and CD95 antibodies. C,  
777 Representative flow cytometric analysis of plasma blasts and plasma cells defined as  
778 TACI<sup>+</sup>CD138<sup>+</sup> from the spleen (left) and the bone marrow (right) from CD23CRE and DNT  
779 mice. D, Total cell numbers of follicular (FO) B cells, marginal zone (MZ) B cells, and plasma  
780 blasts/cells as well as frequencies of GC B cells of Peyer's patches are shown in A-C. Data  
781 are presented as mean values. Symbols represent individual mice. N=3, n=2-4; significance  
782 was calculated using Mann-Whitney test. E, Representative flow cytometry dot plots (merged  
783 from 3 mice) of DNT/GFP expressing cells in indicated B cell populations of DNT mice and  
784 frequencies of GFP expressing cells in the indicated B cells populations of DNT mice. Data  
785 are shown as mean values. Symbols indicate individual mice. N=3, n=2-4; significance was  
786 calculated using 2-way ANOVA. F, Serum antibody concentrations of indicated isotypes from  
787 unimmunized CD23CRE and DNT mice (8-15 weeks old) were determined by ELISA. Data are  
788 shown as mean values. Symbols indicate individual mice. N=3, n=2-4; outliers excluded after  
789 Routs test; significance was calculated using Student's t-test.

790 **Figure 3| Characterization of plasma cell populations in non-immunized DNT mice.**

791 A, Representative flow cytometry dot plots of plasma cells (TACI<sup>+</sup>CD138<sup>+</sup>) (see Figure 2) from  
792 CD23CRE and DNT mice stained with anti CD19 and anti B220 antibodies, B, Total cell  
793 numbers of P1 cells (CD138<sup>high</sup>, TACI<sup>high</sup>, CD19<sup>int</sup>, B220<sup>int</sup>), P2 cells (CD138<sup>high</sup>, TACI<sup>high</sup>,  
794 CD19<sup>int</sup>, B220<sup>low</sup>) and P3 cells (CD138<sup>high</sup>, TACI<sup>high</sup>, CD19<sup>low</sup>, B220<sup>low</sup>) in the spleen and and  
795 bone marrow. Each dot represents one mouse, data are from 3 experiments. C, Frequencies  
796 of GFP expressing cells in B cells (CD19<sup>+</sup>, B220<sup>+</sup>), plasma cells (TACI<sup>+</sup>CD138<sup>+</sup>), P1 cells  
797 (CD138<sup>high</sup>, TACI<sup>high</sup>, CD19<sup>int</sup>, B220<sup>int</sup>), P2 cells (CD138<sup>high</sup>, TACI<sup>high</sup>, CD19<sup>int</sup>, B220<sup>low</sup>) and P3  
798 cells (CD138<sup>high</sup>, TACI<sup>high</sup>, CD19<sup>low</sup>, B220<sup>low</sup>) in the spleen and bone marrow. Each dot  
799 represents one mouse, data are from 3 experiments.

800 **Figure 4| Impaired germinal center reactions, NP response and class switch**  
801 **recombination by DNT expression in B cells**

802 A, CD23CRE and DNT mice were immunized with SRBC. Spleen sections were analyzed by  
803 histology and confocal microscopy. Upper panel: 10 x; lower panel 20 x; blue = IgD-AF647;  
804 green = GL7-PacificBlue; red = PNA-Rhodamine. Scale bars, 100  $\mu$ m (top) and 50  $\mu$ m  
805 (bottom). B, CD23CRE and DNT mice were immunized with NP-KLH in Alum *i.p.* and at d42  
806 with NP-KLH in PBS *i.p.* Anti NP(20)- and NP(4)-specific serum antibody concentrations of  
807 indicated isotypes were determined by ELISA. The line represents the simple moving average;  
808 Symbols indicate individual mice. N=2, n=3; Significance was calculated using 2-way ANOVA  
809 of the area under curve. C, Splenic B cells from CD23CRE and DNT mice were stimulated with  
810 LPS, anti CD40 antibody, IL-4, IL-5, TGF $\beta$  and retinoic acid for 4d. Fixed B cells were analyzed  
811 by flow cytometry by intracellular staining of IgA, IgG and IgM. Representative dot blots are  
812 shown. D, Frequencies of isotype switched (IgA, IgG) or non-switched (IgM) B cells of  
813 stimulated (see C) B cells from CD23CRE and DNT mice. Data are presented as mean;  
814 Symbols indicate individual mice; N=2, n=3; Significance was calculated using 2-way ANOVA.  
815 E, Representative flow cytometric analysis of GFP expressing cells in indicated isotype  
816 switched B cell populations of DNT mice at d4 after stimulation with LPS, anti CD40 antibody,  
817 IL-4, IL-5, TGF $\beta$  and retinoic acid. F, Frequencies of GFP expressing cells in the indicated  
818 isotype switched B cells populations (see E) of DNT mice at d4 after stimulation with LPS, anti  
819 CD40 antibody, IL-4, IL-5, TGF $\beta$  and retinoic acid. Data are shown as mean values. Symbols  
820 indicate individual mice. N= 2, n=3; significance was calculated using one-way ANOVA.

821

822 **Figure 5| Decreased antigen specific plasma cells in NP-KLH immunized DNTWINKLE**  
823 **mice**

824 A, CD23CRE and DNT mice were immunized with NP-KLH in Alum *i.p.* and challenged at d42  
825 with NP-KLH *i.p.*. Plasma cells in the bone marrow were analyzed at d70 using anti CD138,

826 TACI, CD19 and B220 antibodies to define P1, P2 and P3 populations (merged data of 3 mice  
827 from one experiment are shown). Antigen specific plasma cells were detected using surface  
828 staining with NP-PE. B, Frequencies of NP<sup>-</sup>GFP<sup>+</sup>, NP<sup>+</sup>GFP<sup>+</sup> or NP<sup>+</sup>GFP<sup>-</sup> cells in the TACI<sup>+</sup> and  
829 CD138<sup>+</sup> bone marrow cell population (shown in A). C, Frequencies of plasma blasts (PB) and  
830 plasma cells (PC), P1, P2, P3 and antigen specific plasma cells in the bone marrow as shown  
831 in A-B. Data shown as mean; Symbols indicate individual mice; N=2, n=3; Significance was  
832 calculated using 2-way ANOVA. D, Flow cytometric analysis of GFP expressing cells in the  
833 indicated B cells populations of DNT and CRE mice shown in A. E, Frequencies of GFP  
834 expressing cells in the indicated B cells populations of DNT and CRE mice shown in D. Data  
835 are shown as mean values. Symbols indicate individual mice. N= 2, n=3.

836 **Figure 6| Comparable survival but decreased proliferation and plasma blast**  
837 **differentiation in LPS activated B cells from DNT mice.**

838 A, Splenic B cells from CD23CRE and DNT mice were stimulated with LPS for 3d, stained with  
839 propidium iodide (PI) and Annexin V and analyzed by flow cytometry. A representative, merged  
840 (3 mice per genotype) dot blot is shown. B, Frequencies of living (PI<sup>-</sup>, Annexin V<sup>-</sup>), apoptotic  
841 (PI<sup>-</sup>, Annexin V<sup>+</sup>) and necrotic (PI<sup>+</sup>, Annexin V<sup>+</sup>) cells on day 3 after LPS activation shown in A.  
842 Bars represent the mean, symbols represent individual mice. N=2; n=2-4; significance was  
843 calculated using 2-way ANOVA. C, Splenic B cells from CD23CRE and DNT mice were  
844 labelled with eFluor450, stimulated with LPS for 3d, stained with anti CD138 antibody and  
845 analyzed by flow cytometry. A representative, merged (3 mice per genotype) dot blot is shown.  
846 D, Frequencies of cell populations defined according to the number of cell divisions from  
847 CD23CRE and DNT mice on day 3 after LPS activation shown in C. Data are shown as mean  
848 values; Symbols represent individual mice. N=2; n=3; Significance was calculated using 2-way  
849 ANOVA. E, EFluor450 labelled splenic B cells from CD23CRE and DNT mice were stimulated  
850 with LPS for 3d, stained with anti CD138 antibodies and analyzed by flow cytometry. F,  
851 Frequencies of CD138 expressing cells in the GFP<sup>+</sup> and GFP<sup>-</sup> gates shown in E. Significance  
852 was assess by paired t-test. G, Splenic B cells from CD23CRE and DNT mice were stimulated

853 with LPS for 3d, stained with anti CD138 and anti TACI antibodies and analyzed by flow  
854 cytometry. A representative, merged (3 mice per genotype) dot blot is shown. H, Frequencies  
855 of TACI<sup>+</sup> and TACI<sup>+</sup>CD138<sup>+</sup> cells shown in E. Data are shown as mean values; Symbols  
856 represent individual mice. N = 3; n= 2-4; Significance was calculated using 2-way ANOVA. I,  
857 Splenic B cells from CD23CRE and DNT mice were stimulated with LPS for 3d, fixed,  
858 permeabilized, stained with anti CD138 antibody on the surface and intracellular anti BLIMP1  
859 antibodies and analyzed by flow cytometry. A representative, merged (3 mice per genotype)  
860 dot plot is shown. J, Frequencies of the CD138<sup>+</sup>, BLIMP1<sup>+</sup> and BLIMP1<sup>+</sup>CD138<sup>+</sup> cells shown in  
861 G. Data are shown as mean values; Symbols represent individual mice. N = 2; n= 2-4;  
862 Significance was calculated using 2-way ANOVA. K, Representative flow cytometric analysis  
863 of GFP positive, resting, TACI<sup>+</sup>, and TACI<sup>+</sup>CD138<sup>+</sup> cells shown in E. L, Frequencies of GFP  
864 expressing cells in the indicated B cells populations of DNT mice shown in E. Data are shown  
865 as mean values. Symbols indicate individual mice. N = 2; n= 3; Significance was calculated  
866 using 2-way ANOVA.

867

868 **Figure 7| Decreased expression of plasma cell markers and antibody secretion in LPS**  
869 **activated B cells from DNT mice.**

870 A, Splenic B cells from CD23CRE and DNT mice were stimulated with LPS for 3d. Cell lysates  
871 were separated by 10% SDS-PAGE, transferred to nitrocellulose and stained with antibodies  
872 as indicated on the right. Molecular mass standards are shown on the left (kDa). A  
873 representative western blot showing lysates of each two mice is shown. B, Quantification of  
874 IRF4, BLIMP1, XBP1s and IgM protein expression relative to ACTIN of splenic B cells from  
875 CD23CRE and DNT mice stimulated with LPS for 3d. Symbols indicate individual mice. N=2,  
876 n = 2-4. Significance was calculated using 2-way ANOVA. C, Splenic B cells from CD23CRE  
877 and DNT mice were stimulated with LPS for 3d. Supernatants were analyzed by ELISA for the  
878 presence of IgM and IgG. Bars represent the mean  $\pm$  SEM. Symbols indicate individual mice.  
879 N=2, n=4. Significance was calculated using Student's t-test. D, Splenic B cells from CD23CRE

880 and DNT mice were stimulated with LPS for 3d. Supernatants were analyzed by ELISA for the  
881 presence of IL10. Bars represent the mean  $\pm$  SEM. Symbols indicate individual mice. N=1,  
882 n=4. Significance was calculated using t-test. E, Splenic B cells from CD23CRE and DNT mice  
883 were left unstimulated or stimulated with LPS for 3d, fixed, embedded and analyzed by  
884 transmission electron microscopy. Upper panel: resting cells (x 10.000, enlargements  
885 indicated by arrows: x 21.560), lower panel: blasts (x 6000, enlargements x 16.700)

886

887 **Figure 8| Impaired mtDNA replication in activated B cells shifts metabolism to glycolysis**  
888 **and changes intracellular metabolite concentrations**

889 Splenic B cells from CD23CRE and DNT mice were analysed on day 3 after *in vitro* LPS  
890 activation. A, Representative extracellular flux analysis. The basal oxygen consumption rate  
891 (OCR) was measured before and after injection of oligomycin, FCCP and rotenone plus  
892 antimycin A. Symbols represent means of two mice, each of three replicate wells, and error  
893 bars are  $\pm$  SEM. B, Calculated OCR values of basal and maximal respiration, spare respiratory  
894 capacity, and proton leak. Means  $\pm$  SEM from N=2, n=2; values from different experiments  
895 were normalized using the mean of each genotype. Significance was calculated using 2-way  
896 ANOVA. C, Lactate and glucose concentrations in the supernatants on day 3 after LPS  
897 activation. Each dot represents one mouse, N=2, n=2-3. Significance was calculated using 2-  
898 way ANOVA. D, Luminometric detection of intracellular ATP levels of resting and day 3  
899 activated B cells. RLU, relative light units. Symbols represent individual mice; Significance was  
900 calculated using 2-way ANOVA. E, HPLC/MS analysis of intracellular metabolites of FACS  
901 sorted B cells (DNT: viable GFP<sup>+</sup>, CD23CRE: viable). Data show the absolute abundance in  
902 pmol/10<sup>6</sup> cells. Bars represent the mean with  $\pm$  SEM; N=2, n=2; Significance was calculated  
903 using 2-way ANOVA. F, Relative abundance (DNT relative to CD23CRE) of intracellular  
904 metabolites shown in E. Bars at mean; Dotted line at 1; Symbols show the mean for each  
905 experiment; N=2, n=2.

906

907 **Figure 9| Oxidative phosphorylation controls MTOR activity in early plasmablasts via**  
908 **phosphatidic acid**

909 A, Splenic B cells from CD23CRE and DNT mice were stimulated with LPS for 0, 24 h or 72 h.  
910 Cell lysates were separated by 10% SDS-PAGE, transferred to nitrocellulose and stained with  
911 antibodies as indicated on the right. Molecular mass standards are shown on the left (kDa). B,  
912 Quantification of HIF1 $\alpha$  and pAMPK expression relative to Actin and of pAMPK relative to  
913 pRPS6. C, Splenic B cells from CD23CRE and DNT mice were stimulated with LPS for 3d.  
914 Glycerophospholipids of FACS sorted B cells (DNT: viable GFP<sup>+</sup>, CD23CRE: viable) were  
915 analyzed via direct infusion MS/MS (*Shotgun Lipidomics*). A representative neutral loss mass  
916 spectrum of phosphatidic acid species from Cre and DNT B cells (overlay) is shown, with small  
917 numbers indicating masses of the [M+NH<sub>4</sub>]<sup>+</sup> precursor ions and large numbers indicating the  
918 total number of carbon atoms and the total number of double bonds within the two fatty acyl  
919 chains (two representative species, 32:0 and 34:1, are shown). D, The absolute abundance  
920 (nMol/mg protein) of phosphatidic acid (PA), phosphatidylglycerol (PG), phosphatidylinositol  
921 (PI), phosphatidylcholine (PC), phosphatidylethanolamine (PE) and phosphatidylserine (PS) is  
922 depicted as heatmap. Each symbol represents one mouse. One experiment out of two with  
923 identical results is shown. Significance was calculated using 2-way ANOVA. E, Splenic B cells  
924 from CD23CRE and DNT mice were stimulated with LPS in the presence or absence of  
925 phosphatidic acid (PA) liposomes and analyzed after 24 h (upper), 48 h (middle) and 72 h  
926 (please note different y-axis scaling) by flow cytometry. Representative histograms of pRPS6  
927 expression are shown. Numbers indicate frequencies of pRPS6-expressing cells and the  
928 median fluorescence intensity of the positive cells F, The median pRPS6 fluorescence of is  
929 presented as median  $\pm$  SEM. Symbols indicate individual mice; N=1, n=4. G, Frequencies of  
930 pRPS6 positive cells shown in E. Significance was calculated using 2-way ANOVA. The  
931 significance symbols (\*) placed on top of the columns show the difference compared to the

932 untreated controls of the respective genotype while the brackets indicate differences between  
933 the genotypes.

### 934 **Figure 10| Integrated model of OxPhos controlled plasma cell development**

935 Integrated model of OxPhos controlled plasma cell development showing that LPS-activated  
936 B cells replicate mitochondrial DNA which is essential for OxPhos and flux of the TCA cycle.  
937 A positive feedback loop between OxPhos and BLIMP1 expression controls plasma cell  
938 generation: the initial mtDNA dependent increase in OxPhos (1) drives the TCA cycle to  
939 generate phosphatidic acid, to activate MTOR and to inhibit AMPK which itself blocks MTOR  
940 in a AMP/ATP ratio-dependent manner. When OxPhos is active, the TCA cycle fluxes, MTOR  
941 is active and BLIMP1 is expressed (Gaudette et al., 2020; Jones et al., 2016). BLIMP1 then  
942 fosters up-regulation of nuclear OxPhos genes (2) and MTOR activity (Price et al., 2018; Tellier  
943 et al., 2016). Combined upregulation of mtDNA encoded essential mtRC subunits and nuclear  
944 mtRC components ensures full OxPhos activity which prevents AMPK activation and  
945 preserves MTOR function.

946

### 947 **References**

- 948 Abbott, R.K., Thayer, M., Labuda, J., Silva, M., Philbrook, P., Cain, D.W., Kojima, H., Hatfield,  
949 S., Sethumadhavan, S., Ohta, A., *et al.* (2016). Germinal Center Hypoxia  
950 Potentiates Immunoglobulin Class Switch Recombination. *J Immunol* 197, 4014-  
951 4020.
- 952 Adachi, Y., Itoh, K., Yamada, T., Cervený, K.L., Suzuki, T.L., Macdonald, P., Frohman, M.A.,  
953 Ramachandran, R., Iijima, M., and Sesaki, H. (2016). Coincident Phosphatidic Acid  
954 Interaction Restrains Drp1 in Mitochondrial Division. *Mol Cell* 63, 1034-1043.
- 955 Angela, M., Endo, Y., Asou, H.K., Yamamoto, T., Tumes, D.J., Tokuyama, H., Yokote, K., and  
956 Nakayama, T. (2016). Fatty acid metabolic reprogramming via mTOR-mediated  
957 inductions of PPARgamma directs early activation of T cells. *Nat Commun* 7,  
958 13683.
- 959 Athenstaedt, K., and Daum, G. (1999). Phosphatidic acid, a key intermediate in lipid  
960 metabolism. *Eur J Biochem* 266, 1-16.
- 961 Baris, O.R., Ederer, S., Neuhaus, J.F., von Kleist-Retzow, J.C., Wunderlich, C.M., Pal, M.,  
962 Wunderlich, F.T., Peeva, V., Zsurka, G., Kunz, W.S., *et al.* (2015). Mosaic  
963 Deficiency in Mitochondrial Oxidative Metabolism Promotes Cardiac Arrhythmia  
964 during Aging. *Cell Metab* 21, 667-677.
- 965 Benhamron, S., Pattanayak, S.P., Berger, M., and Tirosh, B. (2015). mTOR activation  
966 promotes plasma cell differentiation and bypasses XBP-1 for immunoglobulin  
967 secretion. *Mol Cell Biol* 35, 153-166.

- 968 Blanc, P., Moro-Sibilot, L., Barthly, L., Jagot, F., This, S., de Bernard, S., Buffat, L., Dussurgey,  
969 S., Colisson, R., Hobeika, E., *et al.* (2016). Mature IgM-expressing plasma cells  
970 sense antigen and develop competence for cytokine production upon antigenic  
971 challenge. *Nat Commun* 7, 13600.
- 972 Boothby, M., and Rickert, R.C. (2017). Metabolic Regulation of the Immune Humoral  
973 Response. *Immunity* 46, 743-755.
- 974 Brookens, S.K., Cho, S.H., Basso, P.J., and Boothby, M.R. (2020). AMPKalpha1 in B Cells  
975 Dampens Primary Antibody Responses yet Promotes Mitochondrial Homeostasis  
976 and Persistence of B Cell Memory. *J Immunol*.
- 977 Caro-Maldonado, a., Wang, R., Nichols, a.G., Kuraoka, M., Milasta, S., Sun, L.D., Gavin, a.L.,  
978 Abel, E.D., Kelsoe, G., Green, D.R., and Rathmell, J.C. (2014). Metabolic  
979 Reprogramming Is Required for Antibody Production That Is Suppressed in  
980 Anergic but Exaggerated in Chronically BAFF-Exposed B Cells. *The Journal of*  
981 *Immunology* 192, 3626-3636.
- 982 Chiu, H., Jackson, L.V., Oh, K.I., Mai, A., Ronai, Z.A., Ruggero, D., and Fruman, D.A. (2019).  
983 The mTORC1/4E-BP/eIF4E Axis Promotes Antibody Class Switching in B  
984 Lymphocytes. *J Immunol* 202, 579-590.
- 985 Cocco, M., Stephenson, S., Care, M.A., Newton, D., Barnes, N.A., Davison, A., Rawstron, A.,  
986 Westhead, D.R., Doody, G.M., and Tooze, R.M. (2012). In vitro generation of long-  
987 lived human plasma cells. *J Immunol* 189, 5773-5785.
- 988 Cornelis, R., Hahne, S., Taddeo, A., Petkau, G., Malko, D., Durek, P., Thiem, M., Heiberger,  
989 L., Peter, L., Mohr, E., *et al.* (2020). Stromal Cell-Contact Dependent PI3K and  
990 APRIL Induced NF-kappaB Signaling Prevent Mitochondrial- and ER Stress  
991 Induced Death of Memory Plasma Cells. *Cell Rep* 32, 107982.
- 992 Cossarizza, A., Chang, H.D., Radbruch, A., Acs, A., Adam, D., Adam-Klages, S., Agace, W.W.,  
993 Aghaeepour, N., Akdis, M., Allez, M., *et al.* (2019). Guidelines for the use of flow  
994 cytometry and cell sorting in immunological studies (second edition). *Eur J*  
995 *Immunol* 49, 1457-1973.
- 996 Durandy, A., and Honjo, T. (2001). Human genetic defects in class-switch recombination  
997 (hyper-IgM syndromes). *Curr Opin Immunol* 13, 543-548.
- 998 Ersching, J., Efeyan, A., Mesin, L., Jacobsen, J.T., Pasqual, G., Grabiner, B.C., Dominguez-  
999 Sola, D., Sabatini, D.M., and Victora, G.D. (2017). Germinal Center Selection and  
1000 Affinity Maturation Require Dynamic Regulation of mTORC1 Kinase. *Immunity* 46,  
1001 1045-1058 e1046.
- 1002 Foster, D.A. (2013). Phosphatidic acid and lipid-sensing by mTOR. *Trends Endocrinol Metab*  
1003 24, 272-278.
- 1004 Foster, D.A., Salloum, D., Menon, D., and Frias, M.A. (2014). Phospholipase D and the  
1005 maintenance of phosphatidic acid levels for regulation of mammalian target of  
1006 rapamycin (mTOR). *J Biol Chem* 289, 22583-22588.
- 1007 Frasca, D., Diaz, A., Romero, M., Thaller, S., and Blomberg, B.B. (2019). Metabolic  
1008 requirements of human pro-inflammatory B cells in aging and obesity. *PLoS One*  
1009 14, e0219545.
- 1010 Garcia, D., and Shaw, R.J. (2017). AMPK: Mechanisms of Cellular Energy Sensing and  
1011 Restoration of Metabolic Balance. *Mol Cell* 66, 789-800.
- 1012 Gaudette, B.T., Jones, D.D., Bortnick, A., Argon, Y., and Allman, D. (2020). mTORC1  
1013 coordinates an immediate unfolded protein response-related transcriptome in  
1014 activated B cells preceding antibody secretion. *Nat Commun* 11, 723.
- 1015 Goffart, S., Cooper, H.M., Tynismaa, H., Wanrooij, S., Suomalainen, A., and Spelbrink, J.N.  
1016 (2009). Twinkle mutations associated with autosomal dominant progressive  
1017 external ophthalmoplegia lead to impaired helicase function and in vivo mtDNA  
1018 replication stalling. *Hum Mol Genet* 18, 328-340.
- 1019 Gustafsson, C.M., Falkenberg, M., and Larsson, N.G. (2016). Maintenance and Expression of  
1020 Mammalian Mitochondrial DNA. *Annu Rev Biochem* 85, 133-160.
- 1021 Harnoss, J.M., Strowitzki, M.J., Radhakrishnan, P., Platzer, L.K., Harnoss, J.C., Hank, T., Cai,  
1022 J., Ulrich, A., and Schneider, M. (2015). Therapeutic inhibition of prolyl hydroxylase



- 1023 domain-containing enzymes in surgery: putative applications and challenges.  
1024 Hypoxia (Auckl) 3, 1-14.
- 1025 Haumann, S., Boix, J., Knuever, J., Bieling, A., Vila Sanjurjo, A., Elson, J.L., Blakely, E.L.,  
1026 Taylor, R.W., Riet, N., Abken, H., *et al.* (2020). Mitochondrial DNA mutations  
1027 induce mitochondrial biogenesis and increase the tumorigenic potential of Hodgkin  
1028 and Reed-Sternberg cells. *Carcinogenesis*.
- 1029 Hawkins, E.D., Turner, M.L., Wellard, C.J., Zhou, J.H., Dowling, M.R., and Hodgkin, P.D.  
1030 (2013). Quantal and graded stimulation of B lymphocytes as alternative strategies  
1031 for regulating adaptive immune responses. *Nat Commun* 4, 2406.
- 1032 Hofmann, J., Bornke, F., Schmiedl, A., Kleine, T., and Sonnewald, U. (2011). Detecting  
1033 functional groups of Arabidopsis mutants by metabolic profiling and evaluation of  
1034 pleiotropic responses. *Front Plant Sci* 2, 82.
- 1035 Holzer, T., Probst, K., Etich, J., Auler, M., Georgieva, V.S., Bluhm, B., Frie, C., Heilig, J.,  
1036 Niehoff, A., Nuchel, J., *et al.* (2019). Respiratory chain inactivation links cartilage-  
1037 mediated growth retardation to mitochondrial diseases. *J Cell Biol* 218, 1853-1870.
- 1038 Hornig-Do, H.T., Tatsuta, T., Buckermann, A., Bust, M., Kollberg, G., Rotig, A., Hellmich, M.,  
1039 Nijtmans, L., and Wiesner, R.J. (2012). Nonsense mutations in the COX1 subunit  
1040 impair the stability of respiratory chain complexes rather than their assembly.  
1041 *EMBO J* 31, 1293-1307.
- 1042 Hudson, G., Deschauer, M., Busse, K., Zierz, S., and Chinnery, P.F. (2005). Sensory ataxic  
1043 neuropathy due to a novel C10orf2 mutation with probable germline mosaicism.  
1044 *Neurology* 64, 371-373.
- 1045 Ise, W., Fujii, K., Shiroguchi, K., Ito, A., Kometani, K., Takeda, K., Kawakami, E., Yamashita,  
1046 K., Suzuki, K., Okada, T., and Kurosaki, T. (2018). T Follicular Helper Cell-  
1047 Germinal Center B Cell Interaction Strength Regulates Entry into Plasma Cell or  
1048 Recycling Germinal Center Cell Fate. *Immunity* 48, 702-715 e704.
- 1049 Iwata, T.N., Ramirez-Komo, J.A., Park, H., and Iritani, B.M. (2017). Control of B lymphocyte  
1050 development and functions by the mTOR signaling pathways. *Cytokine Growth*  
1051 *Factor Rev* 35, 47-62.
- 1052 Jang, K.J., Mano, H., Aoki, K., Hayashi, T., Muto, A., Nambu, Y., Takahashi, K., Itoh, K.,  
1053 Taketani, S., Nutt, S.L., *et al.* (2015). Mitochondrial function provides instructive  
1054 signals for activation-induced B-cell fates. *Nat Commun* 6, 6750.
- 1055 Jellusova, J., Cato, M.H., Apgar, J.R., Ramezani-Rad, P., Leung, C.R., Chen, C., Richardson,  
1056 A.D., Conner, E.M., Benschop, R.J., Woodgett, J.R., and Rickert, R.C. (2017).  
1057 Gsk3 is a metabolic checkpoint regulator in B cells. *Nat Immunol* 18, 303-312.
- 1058 Jones, D.D., Gaudette, B.T., Wilmore, J.R., Chernova, I., Bortnick, A., Weiss, B.M., and  
1059 Allman, D. (2016). mTOR has distinct functions in generating versus sustaining  
1060 humoral immunity. *J Clin Invest* 126, 4250-4261.
- 1061 Kallies, A., Hasbold, J., Fairfax, K., Pridans, C., Emslie, D., McKenzie, B.S., Lew, A.M.,  
1062 Corcoran, L.M., Hodgkin, P.D., Tarlinton, D.M., and Nutt, S.L. (2007). Initiation of  
1063 plasma-cell differentiation is independent of the transcription factor Blimp-1.  
1064 *Immunity* 26, 555-566.
- 1065 Keating, R., Hertz, T., Wehenkel, M., Harris, T.L., Edwards, B.A., McClaren, J.L., Brown, S.A.,  
1066 Surman, S., Wilson, Z.S., Bradley, P., *et al.* (2013). The kinase mTOR modulates  
1067 the antibody response to provide cross-protective immunity to lethal infection with  
1068 influenza virus. *Nat Immunol* 14, 1266-1276.
- 1069 Kennedy, E.P., and Lehninger, A.L. (1949). Oxidation of fatty acids and tricarboxylic acid cycle  
1070 intermediates by isolated rat liver mitochondria. *J Biol Chem* 179, 957-972.
- 1071 Kolde, R. (2015). Pheatmap: Pretty Heatmaps. R package (version 1.08) [software].
- 1072 Krebs, H.A. (1948). The tricarboxylic acid cycle. *Harvey Lect Series* 44, 165-199.
- 1073 Kumar, V., Bouameur, J.E., Bar, J., Rice, R.H., Hornig-Do, H.T., Roop, D.R., Schwarz, N.,  
1074 Brodesser, S., Thiering, S., Leube, R.E., *et al.* (2015). A keratin scaffold regulates  
1075 epidermal barrier formation, mitochondrial lipid composition, and activity. *J Cell Biol*  
1076 211, 1057-1075.
- 1077 Kunisawa, J. (2017). Metabolic changes during B cell differentiation for the production of  
1078 intestinal IgA antibody. *Cell Mol Life Sci* 74, 1503-1509.

- 1079 Kwon, K., Hutter, C., Sun, Q., Bilic, I., Cobaleda, C., Malin, S., and Busslinger, M. (2008).  
1080 Instructive role of the transcription factor E2A in early B lymphopoiesis and  
1081 germinal center B cell development. *Immunity* 28, 751-762.
- 1082 Lam, W.Y., Becker, A.M., Kennerly, K.M., Wong, R., Curtis, J.D., Llufrío, E.M., McCommis,  
1083 K.S., Fahrman, J., Pizzato, H.A., Nunley, R.M., *et al.* (2016). Mitochondrial  
1084 Pyruvate Import Promotes Long-Term Survival of Antibody-Secreting Plasma  
1085 Cells. *Immunity* 45, 60-73.
- 1086 Lam, W.Y., and Bhattacharya, D. (2018). Metabolic Links between Plasma Cell Survival,  
1087 Secretion, and Stress. *Trends Immunol* 39, 19-27.
- 1088 Lam, W.Y., Jash, A., Yao, C.H., D'Souza, L., Wong, R., Nunley, R.M., Meares, G.P., Patti,  
1089 G.J., and Bhattacharya, D. (2018). Metabolic and Transcriptional Modules  
1090 Independently Diversify Plasma Cell Lifespan and Function. *Cell Rep* 24, 2479-  
1091 2492 e2476.
- 1092 Lee, S.Y., Moon, S.J., Kim, E.K., Seo, H.B., Yang, E.J., Son, H.J., Kim, J.K., Min, J.K., Park,  
1093 S.H., and Cho, M.L. (2017). Metformin Suppresses Systemic Autoimmunity in  
1094 Roquin(san/san) Mice through Inhibiting B Cell Differentiation into Plasma Cells via  
1095 Regulation of AMPK/mTOR/STAT3. *J Immunol* 198, 2661-2670.
- 1096 Loder, F., Mutschler, B., Ray, R.J., Paige, C.J., Sideras, P., Torres, R., Lamers, M.C., and  
1097 Carsetti, R. (1999). B cell development in the spleen takes place in discrete steps  
1098 and is determined by the quality of B cell receptor-derived signals. *J Exp Med* 190,  
1099 75-89.
- 1100 Low, M.S.Y., Brodie, E.J., Fedele, P.L., Liao, Y., Grigoriadis, G., Strasser, A., Kallies, A., Willis,  
1101 S.N., Tellier, J., Shi, W., *et al.* (2019). IRF4 Activity Is Required in Established  
1102 Plasma Cells to Regulate Gene Transcription and Mitochondrial Homeostasis. *Cell*  
1103 *Rep* 29, 2634-2645 e2635.
- 1104 MacLennan, I.C. (1994). Germinal centers. *Annu Rev Immunol* 12, 117-139.
- 1105 Martinez-Reyes, I., and Chandel, N.S. (2020). Mitochondrial TCA cycle metabolites control  
1106 physiology and disease. *Nat Commun* 11, 102.
- 1107 Menon, D., Salloum, D., Bernfeld, E., Gorodetsky, E., Akseirod, A., Frias, M.A., Sudderth, J.,  
1108 Chen, P.H., DeBerardinis, R., and Foster, D.A. (2017). Lipid sensing by mTOR  
1109 complexes via de novo synthesis of phosphatidic acid. *J Biol Chem* 292, 6303-  
1110 6311.
- 1111 Milasta, S., Dillon, C.P., Sturm, O.E., Verbist, K.C., Brewer, T.L., Quarato, G., Brown, S.A.,  
1112 Frase, S., Janke, L.J., Perry, S.S., *et al.* (2016). Apoptosis-Inducing-Factor-  
1113 Dependent Mitochondrial Function Is Required for T Cell but Not B Cell Function.  
1114 *Immunity* 44, 88-102.
- 1115 Milenkovic, D., Matic, S., Kuhl, I., Ruzzenente, B., Freyer, C., Jemt, E., Park, C.B., Falkenberg,  
1116 M., and Larsson, N.G. (2013). TWINKLE is an essential mitochondrial helicase  
1117 required for synthesis of nascent D-loop strands and complete mtDNA replication.  
1118 *Hum Mol Genet* 22, 1983-1993.
- 1119 Morell, A., Terry, W.D., and Waldmann, T.A. (1970). Metabolic properties of IgG subclasses in  
1120 man. *J Clin Invest* 49, 673-680.
- 1121 Mullen, A.R., Wheaton, W.W., Jin, E.S., Chen, P.H., Sullivan, L.B., Cheng, T., Yang, Y.,  
1122 Linehan, W.M., Chandel, N.S., and DeBerardinis, R.J. (2011). Reductive  
1123 carboxylation supports growth in tumour cells with defective mitochondria. *Nature*  
1124 481, 385-388.
- 1125 Nutt, S.L., Taubenheim, N., Hasbold, J., Corcoran, L.M., and Hodgkin, P.D. (2011). The  
1126 genetic network controlling plasma cell differentiation. *Semin Immunol* 23, 341-  
1127 349.
- 1128 Pracht, K., Meinzinger, J., Daum, P., Schulz, S.R., Reimer, D., Hauke, M., Roth, E., Mielenz,  
1129 D., Berek, C., Corte-Real, J., *et al.* (2017). A new staining protocol for detection of  
1130 murine antibody-secreting plasma cell subsets by flow cytometry. *Eur J Immunol*  
1131 47, 1389-1392.
- 1132 Price, M.J., Patterson, D.G., Scharer, C.D., and Boss, J.M. (2018). Progressive Upregulation  
1133 of Oxidative Metabolism Facilitates Plasmablast Differentiation to a T-Independent  
1134 Antigen. *Cell Rep* 23, 3152-3159.

- 1135 S. T. Poschenrieder, S.G.W., K. Castiglione, J. (2016). Efficient production of uniform  
1136 nanometer-sized polymer vesicles in stirred-tank reactors. *J Appl Polym Sc*,  
1137 43274.
- 1138 Sarzi, E., Goffart, S., Serre, V., Chretien, D., Slama, A., Munnich, A., Spelbrink, J.N., and Rotig,  
1139 A. (2007). Twinkle helicase (PEO1) gene mutation causes mitochondrial DNA  
1140 depletion. *Ann Neurol* 62, 579-587.
- 1141 Schuh, W., Mielenz, D., and Jäck, H.M. (2020). Unraveling the mysteries of plasma cells. *Adv*  
1142 *Immunol* 146, 57-107.
- 1143 Schulz, H. (2008). Oxidation of fatty acids in eukaryotes. In *Biochemistry of Lipids, Lipoproteins*  
1144 *and Membranes* (Amsterdam: Elsevier), pp. 131-154.
- 1145 Shanmugasundaram, K., Nayak, B., Shim, E.H., Livi, C.B., Block, K., and Sudarshan, S.  
1146 (2014). The oncometabolite fumarate promotes pseudohypoxia through  
1147 noncanonical activation of NF-kappaB signaling. *J Biol Chem* 289, 24691-24699.
- 1148 Spelbrink, J.N., Li, F.Y., Tiranti, V., Nikali, K., Yuan, Q.P., Tariq, M., Wanrooij, S., Garrido, N.,  
1149 Comi, G., Morandi, L., *et al.* (2001). Human mitochondrial DNA deletions  
1150 associated with mutations in the gene encoding Twinkle, a phage T7 gene 4-like  
1151 protein localized in mitochondria. *Nat Genet* 28, 223-231.
- 1152 Stavnezer, J., Guikema, J.E., and Schrader, C.E. (2008). Mechanism and regulation of class  
1153 switch recombination. *Annu Rev Immunol* 26, 261-292.
- 1154 Steinmetz, T.D., Schlotzer-Schrehardt, U., Hearne, A., Schuh, W., Wittner, J., Schulz, S.R.,  
1155 Winkler, T.H., Jack, H.M., and Mielenz, D. (2020). TFG is required for autophagy  
1156 flux and to prevent endoplasmic reticulum stress in CH12 B lymphoma cells.  
1157 *Autophagy*, 1-19.
- 1158 Tellier, J., Shi, W., Minnich, M., Liao, Y., Crawford, S., Smyth, G.K., Kallies, A., Busslinger, M.,  
1159 and Nutt, S.L. (2016). Blimp-1 controls plasma cell function through the regulation  
1160 of immunoglobulin secretion and the unfolded protein response. *Nat Immunol* 17,  
1161 323-330.
- 1162 Tokumasu, F., Nardone, G.A., Ostera, G.R., Fairhurst, R.M., Beaudry, S.D., Hayakawa, E.,  
1163 and Dvorak, J.A. (2009). Altered membrane structure and surface potential in  
1164 homozygous hemoglobin C erythrocytes. *PLoS One* 4, e5828.
- 1165 Tokunaga, C., Yoshino, K., and Yonezawa, K. (2004). mTOR integrates amino acid- and  
1166 energy-sensing pathways. *Biochem Biophys Res Commun* 313, 443-446.
- 1167 Toschi, A., Lee, E., Xu, L., Garcia, A., Gadir, N., and Foster, D.A. (2009). Regulation of  
1168 mTORC1 and mTORC2 complex assembly by phosphatidic acid: competition with  
1169 rapamycin. *Mol Cell Biol* 29, 1411-1420.
- 1170 Urbanczyk, S., Stein, M., Schuh, W., Jäck, H.M., Mougiakakos, D., and Mielenz, D. (2018).  
1171 Regulation of Energy Metabolism during Early B Lymphocyte Development. *Int J*  
1172 *Mol Sci* 19.
- 1173 Victora, G.D., Schwickert, T.A., Fooksman, D.R., Kamphorst, A.O., Meyer-Hermann, M.,  
1174 Dustin, M.L., and Nussenzweig, M.C. (2010). Germinal center dynamics revealed  
1175 by multiphoton microscopy with a photoactivatable fluorescent reporter. *Cell* 143,  
1176 592-605.
- 1177 von Kleist-Retzow, J.C., Hornig-Do, H.T., Schauen, M., Eckertz, S., Dinh, T.A., Stassen, F.,  
1178 Lottmann, N., Bust, M., Galunska, B., Wielckens, K., *et al.* (2007). Impaired  
1179 mitochondrial Ca<sup>2+</sup> homeostasis in respiratory chain-deficient cells but efficient  
1180 compensation of energetic disadvantage by enhanced anaerobic glycolysis due to  
1181 low ATP steady state levels. *Exp Cell Res* 313, 3076-3089.
- 1182 Waldmann, T.A., and Strober, W. (1969). Metabolism of immunoglobulins. *Prog Allergy* 13, 1-  
1183 110.
- 1184 Waters, L.R., Ahsan, F.M., Ten Hoeve, J., Hong, J.S., Kim, D.N.H., Minasyan, A., Braas, D.,  
1185 Graeber, T.G., Zangle, T.A., and Teitell, M.A. (2019). Ampk regulates IgD  
1186 expression but not energy stress with B cell activation. *Sci Rep* 9, 8176.
- 1187 Waters, L.R., Ahsan, F.M., Wolf, D.M., Shirihai, O., and Teitell, M.A. (2018). Initial B Cell  
1188 Activation Induces Metabolic Reprogramming and Mitochondrial Remodeling.  
1189 *iScience* 5, 99-109.

- 1190 Weiland, D., Brachvogel, B., Hornig-Do, H.T., Neuhaus, J.F.G., Holzer, T., Tobin, D.J.,  
1191 Niessen, C.M., Wiesner, R.J., and Baris, O.R. (2018). Imbalance of Mitochondrial  
1192 Respiratory Chain Complexes in the Epidermis Induces Severe Skin Inflammation.  
1193 *J Invest Dermatol* 138, 132-140.
- 1194 Weisel, F.J., Mullett, S.J., Elsner, R.A., Menk, A.V., Trivedi, N., Luo, W., Wikenheiser, D.,  
1195 Hawse, W.F., Chikina, M., Smita, S., *et al.* (2020). Germinal center B cells  
1196 selectively oxidize fatty acids for energy while conducting minimal glycolysis. *Nat*  
1197 *Immunol* 21, 331-342.
- 1198 Xu, S., Huo, J., Huang, Y., Aw, M., Chen, S., Mak, S., Yip, L.Y., Ho, Y.S., Ng, S.W., Tan, A.H.,  
1199 *et al.* (2019). von Hippel-Lindau Protein Maintains Metabolic Balance to Regulate  
1200 the Survival of Naive B Lymphocytes. *iScience* 17, 379-392.
- 1201 Yoon, M.S., Rosenberger, C.L., Wu, C., Truong, N., Sweedler, J.V., and Chen, J. (2015). Rapid  
1202 mitogenic regulation of the mTORC1 inhibitor, DEPTOR, by phosphatidic acid. *Mol*  
1203 *Cell* 58, 549-556.
- 1204 Zhang, S., Pruitt, M., Tran, D., Du Bois, W., Zhang, K., Patel, R., Hoover, S., Simpson, R.M.,  
1205 Simmons, J., Gary, J., *et al.* (2013). B cell-specific deficiencies in mTOR limit  
1206 humoral immune responses. *J Immunol* 191, 1692-1703.

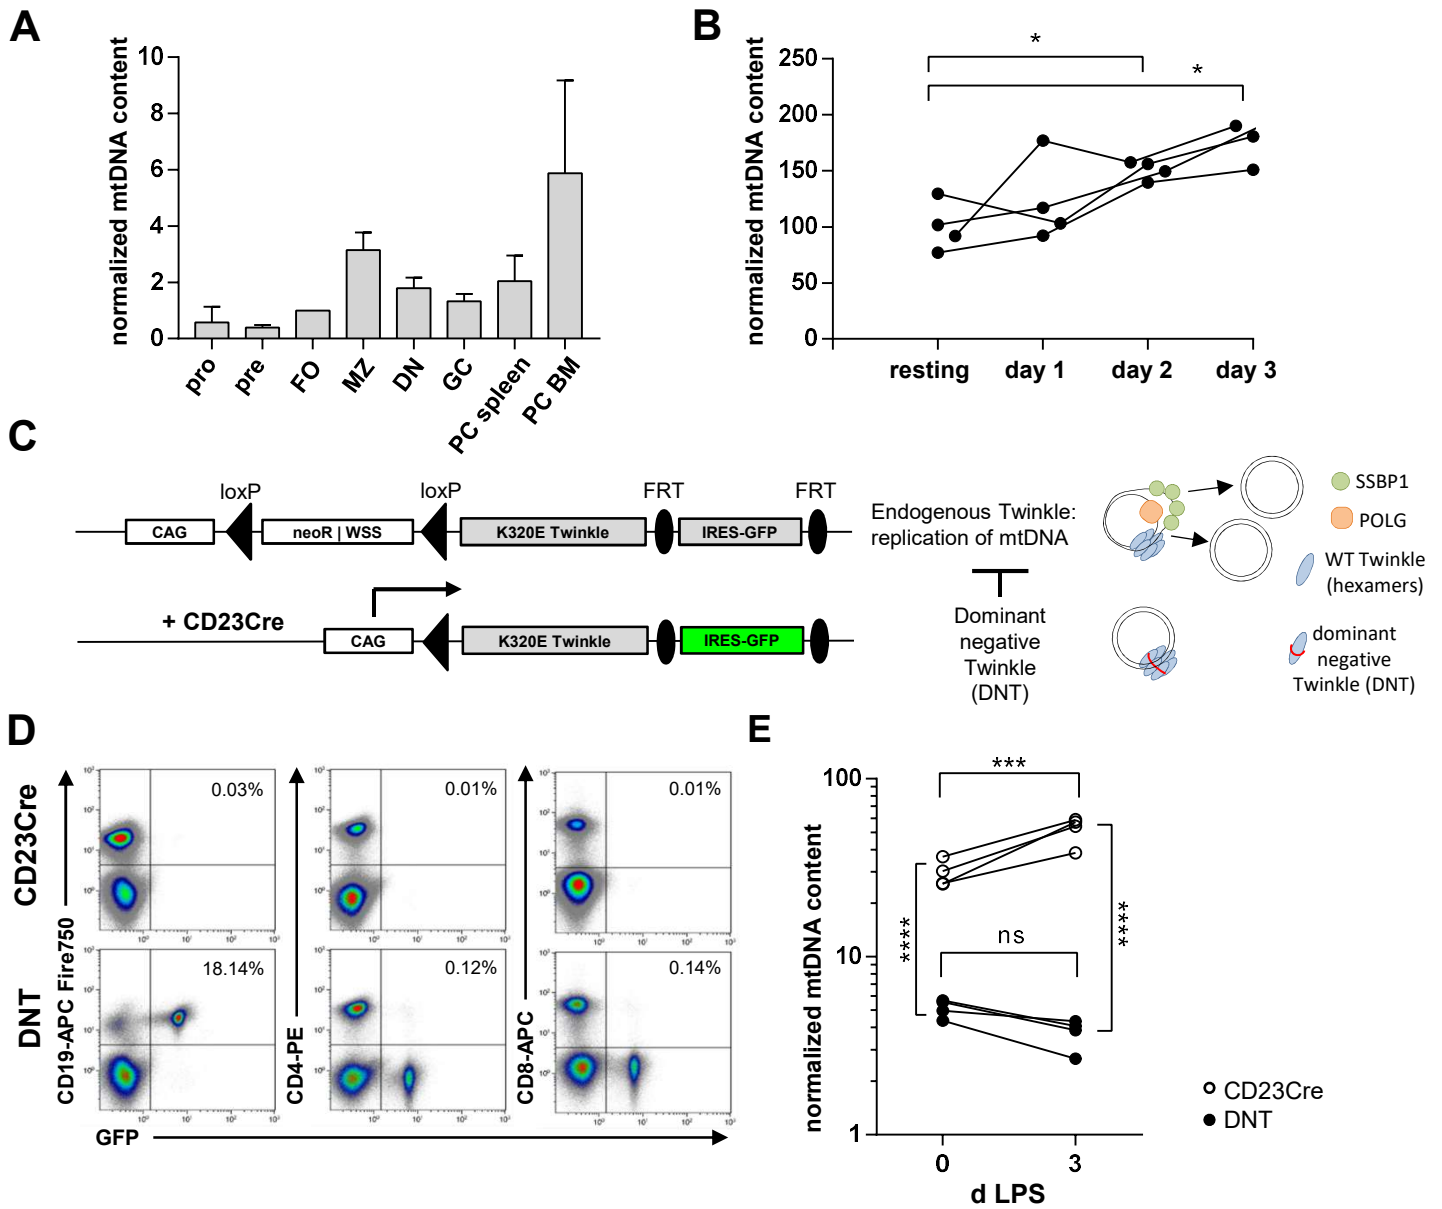

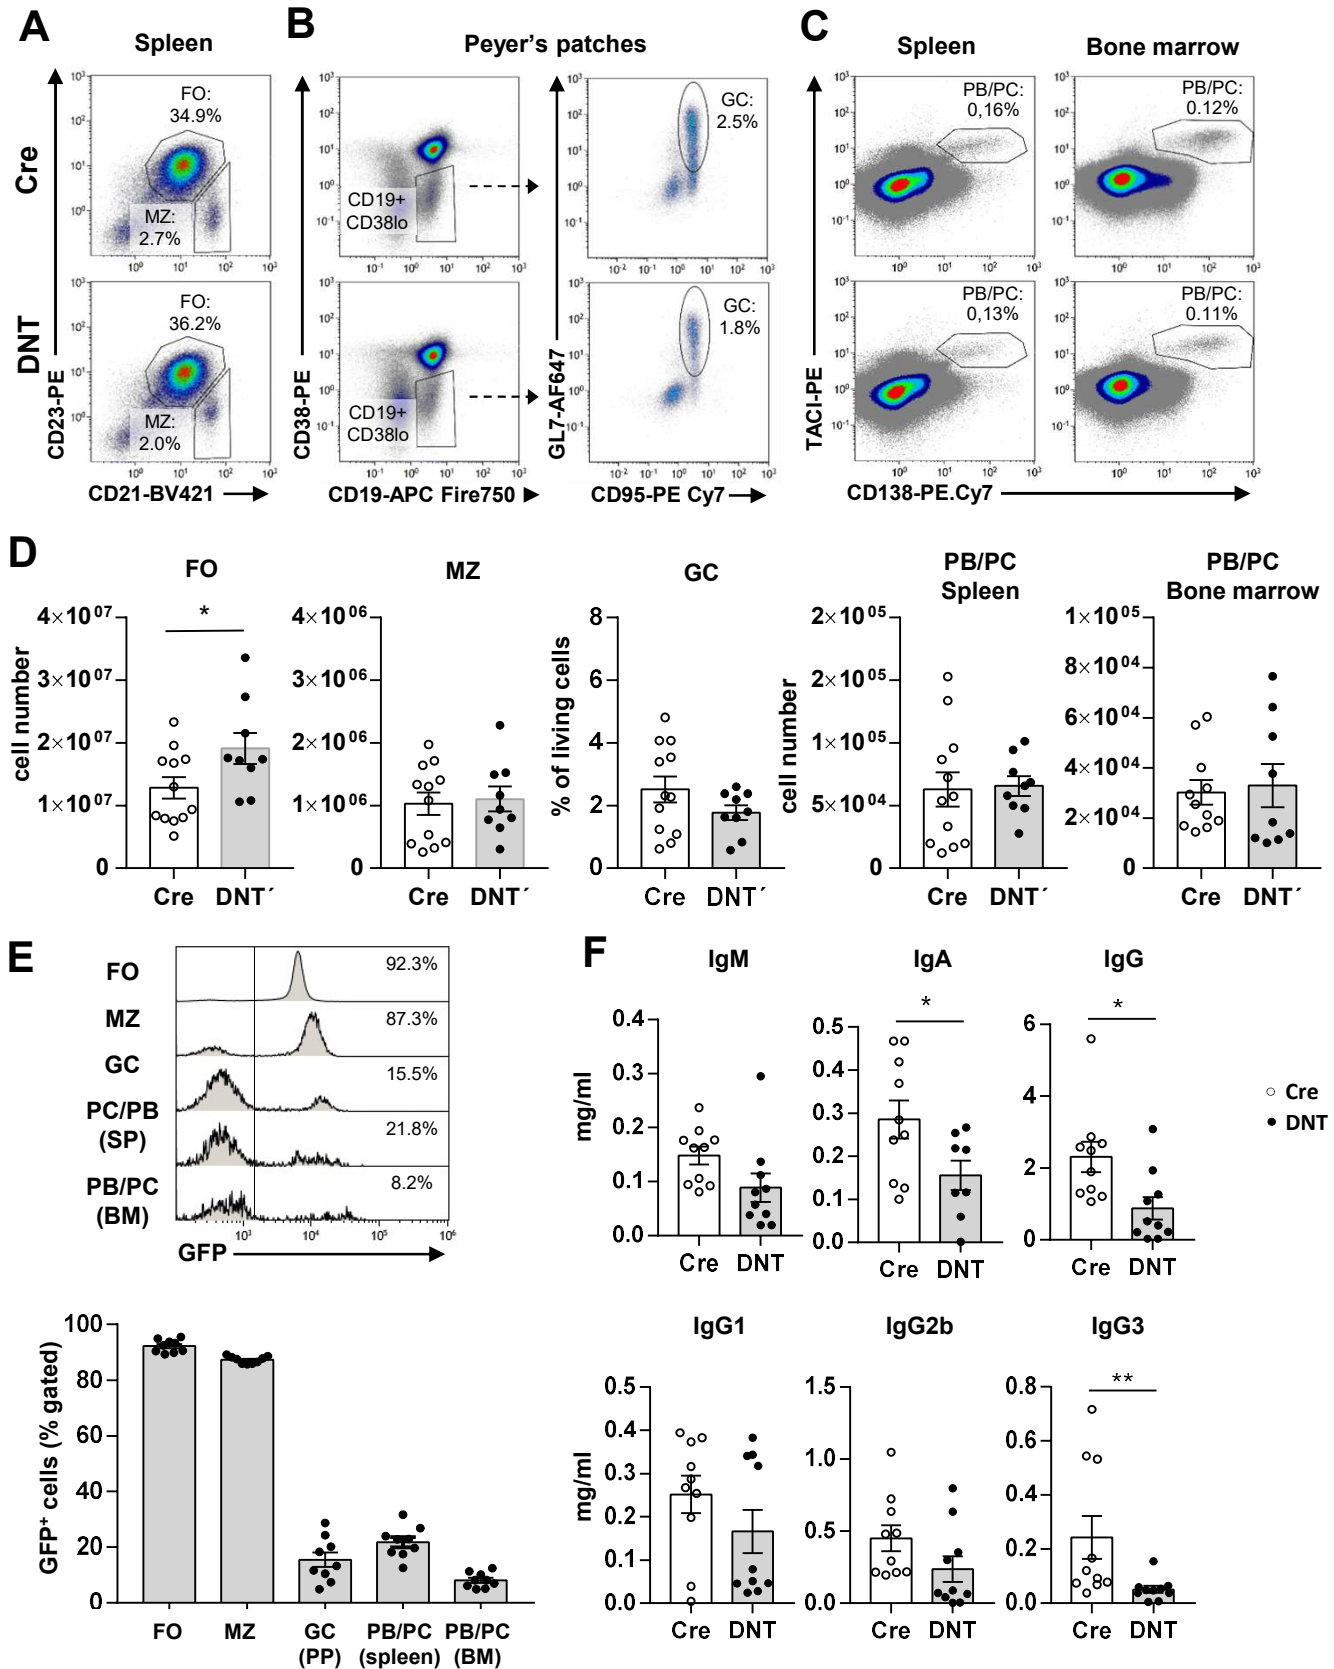

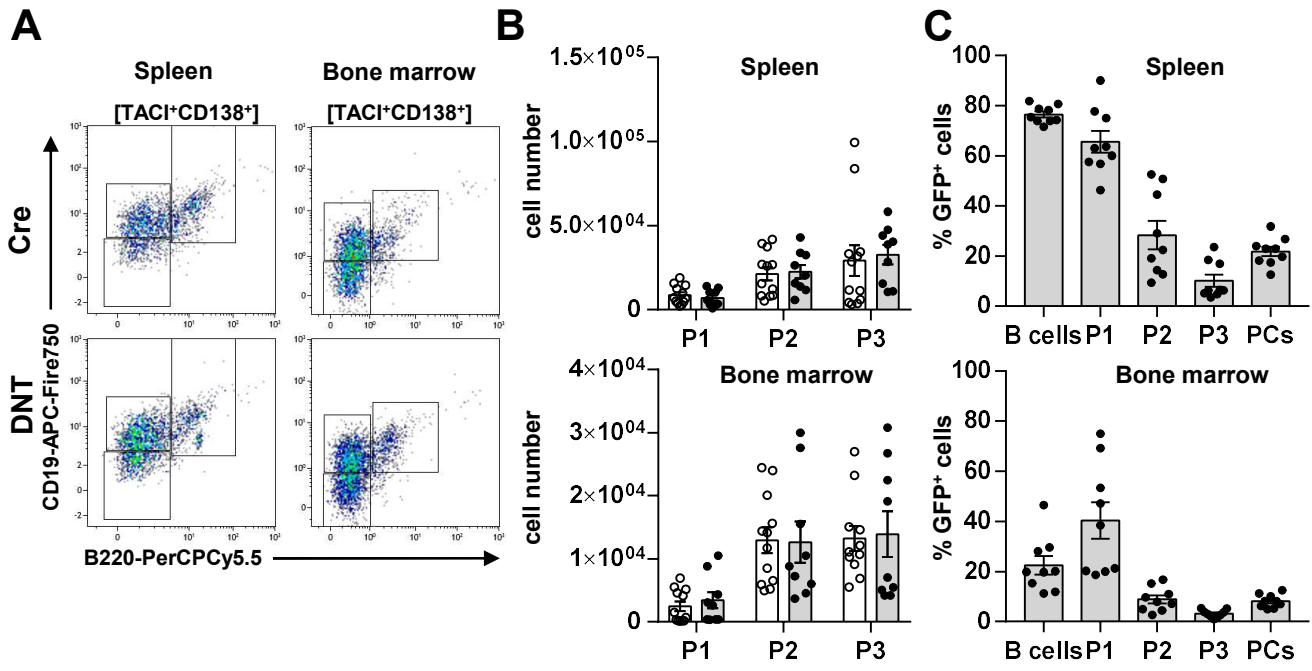

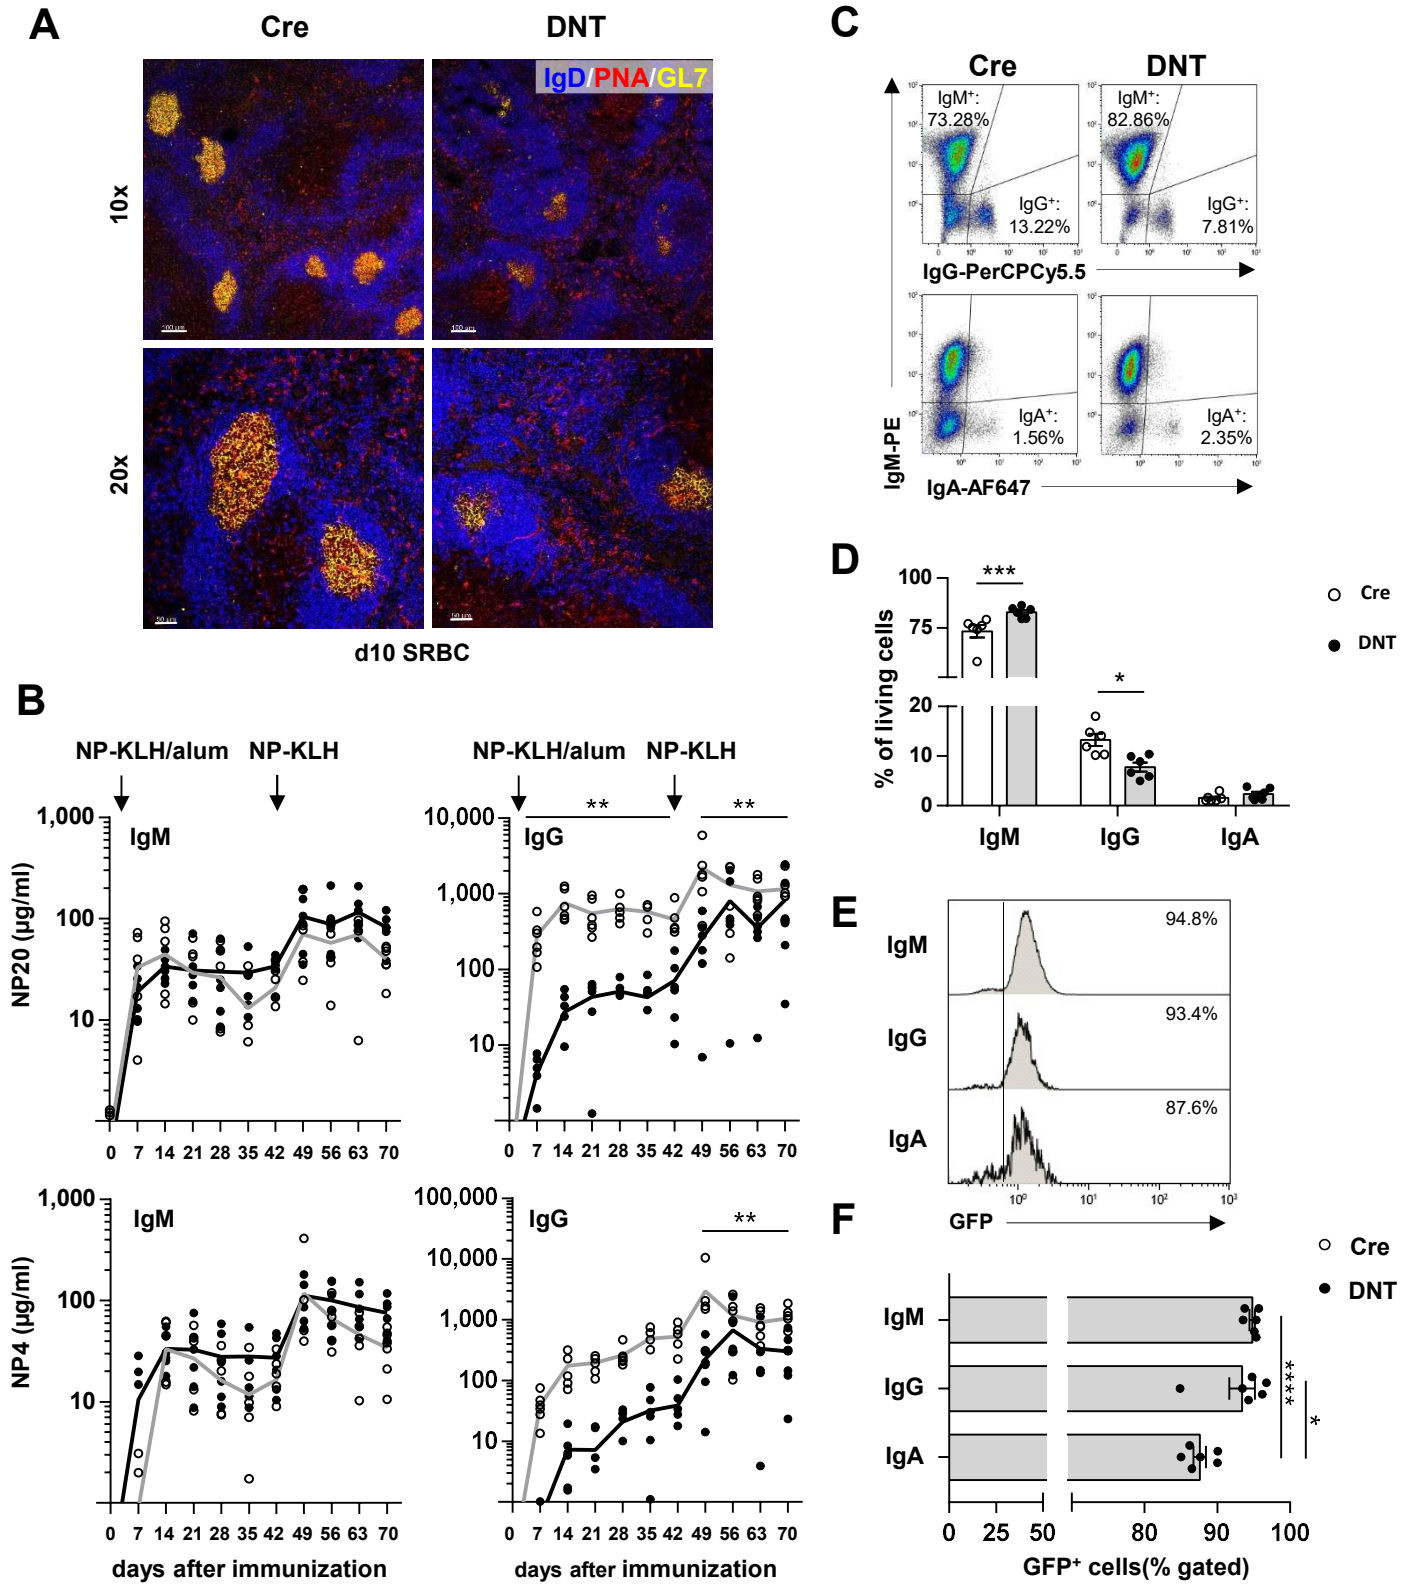



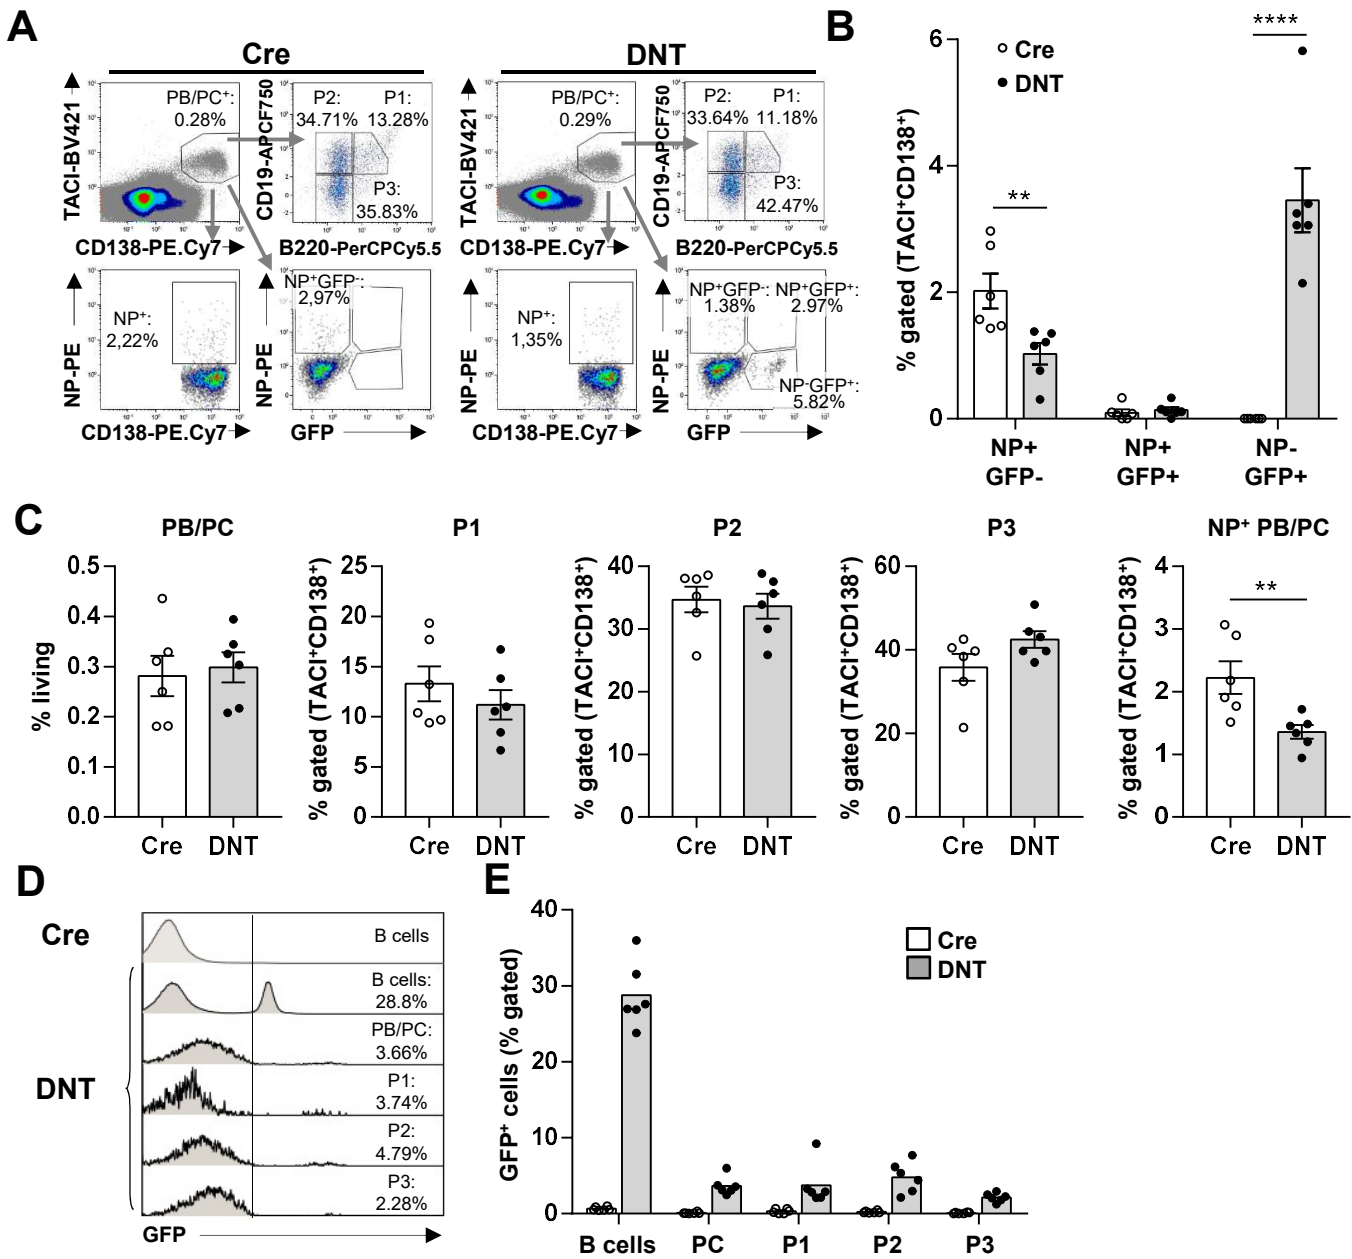

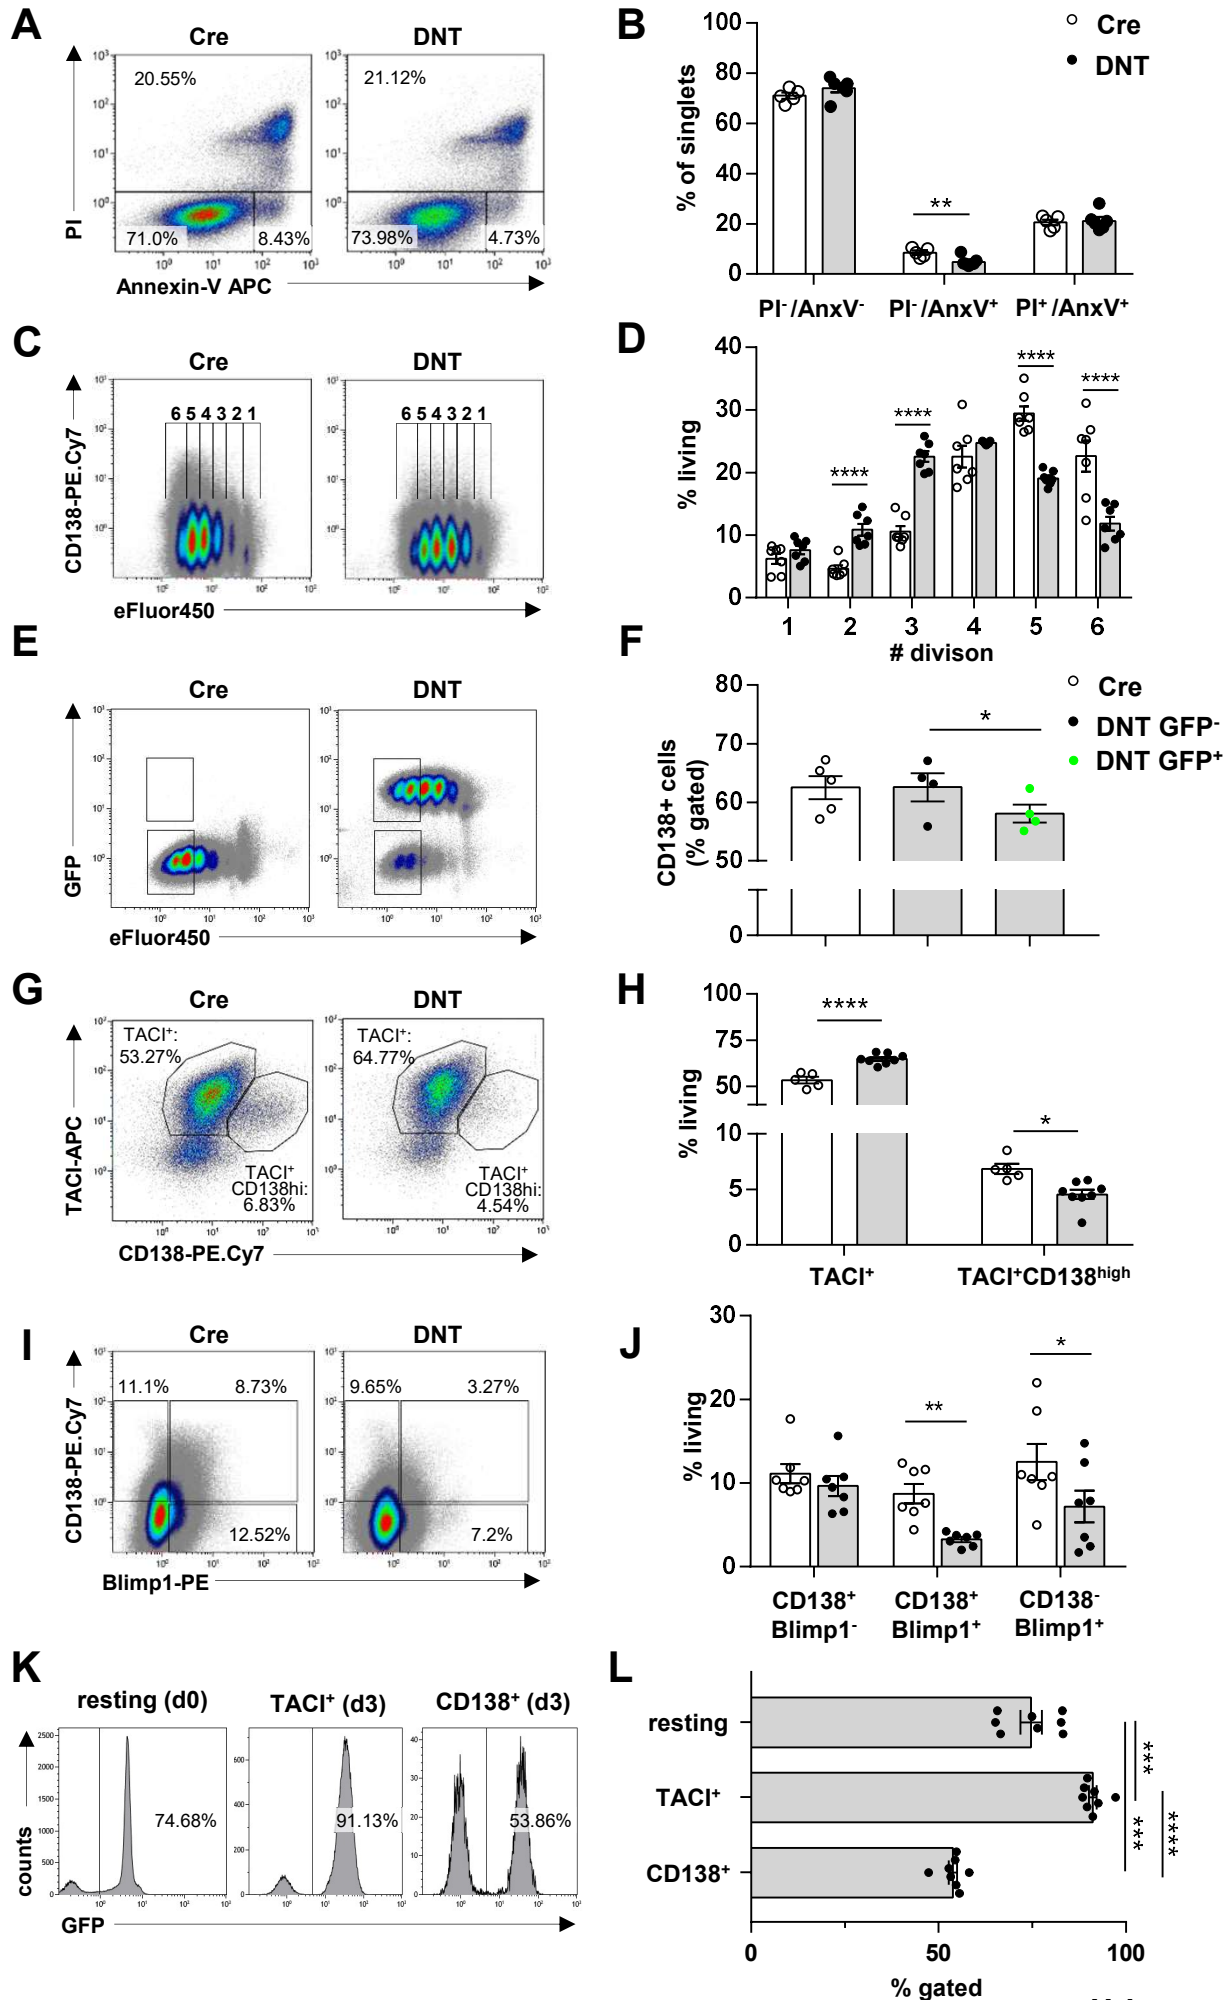

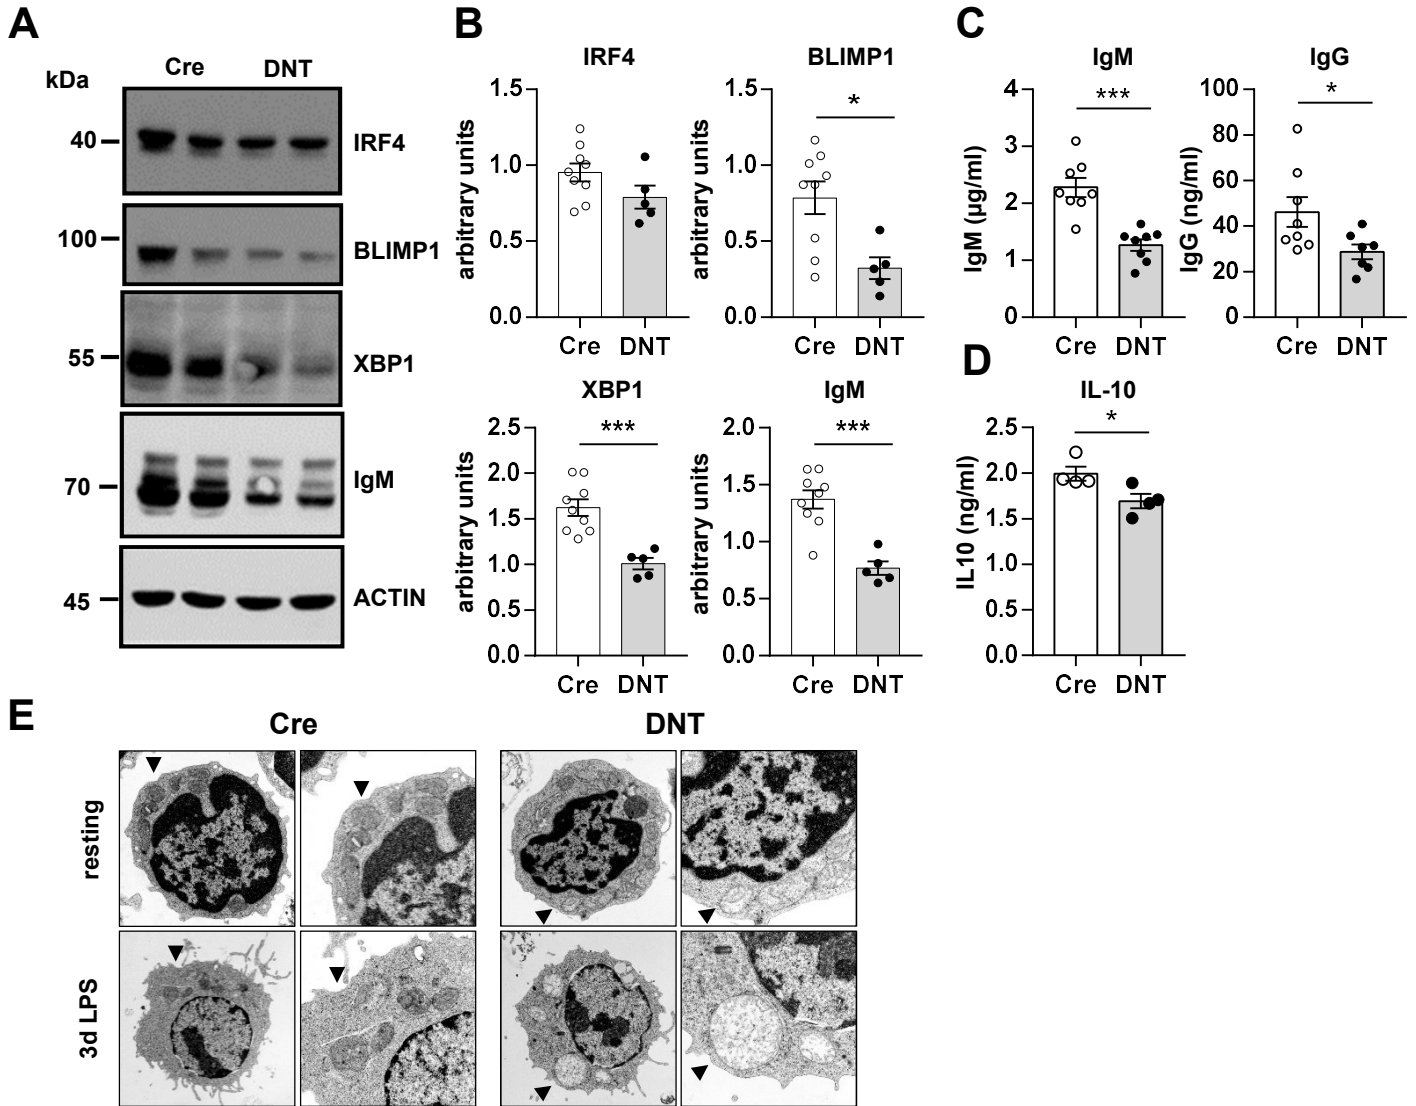

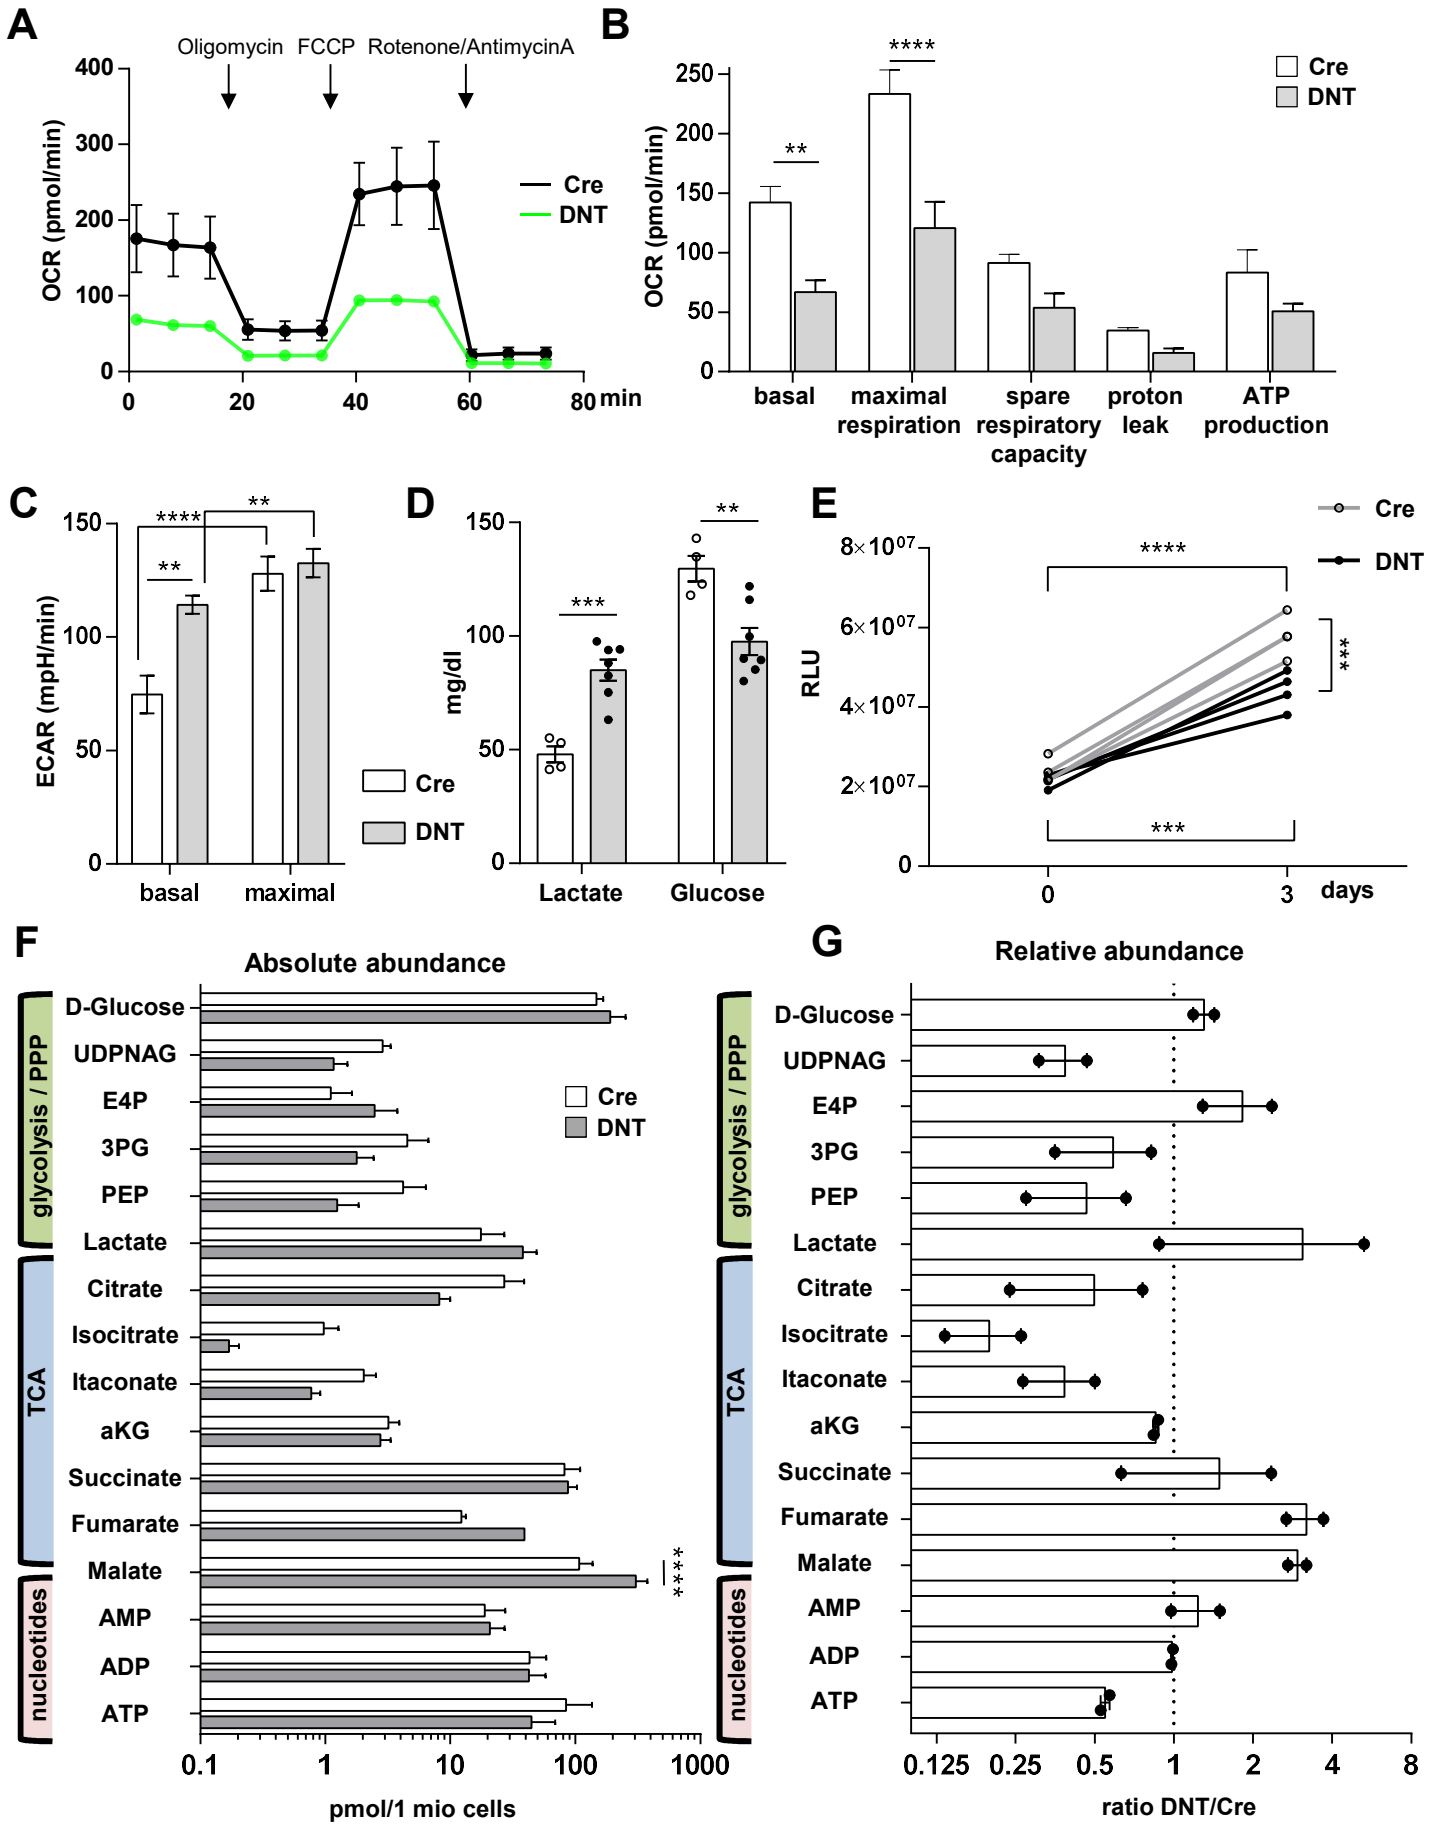

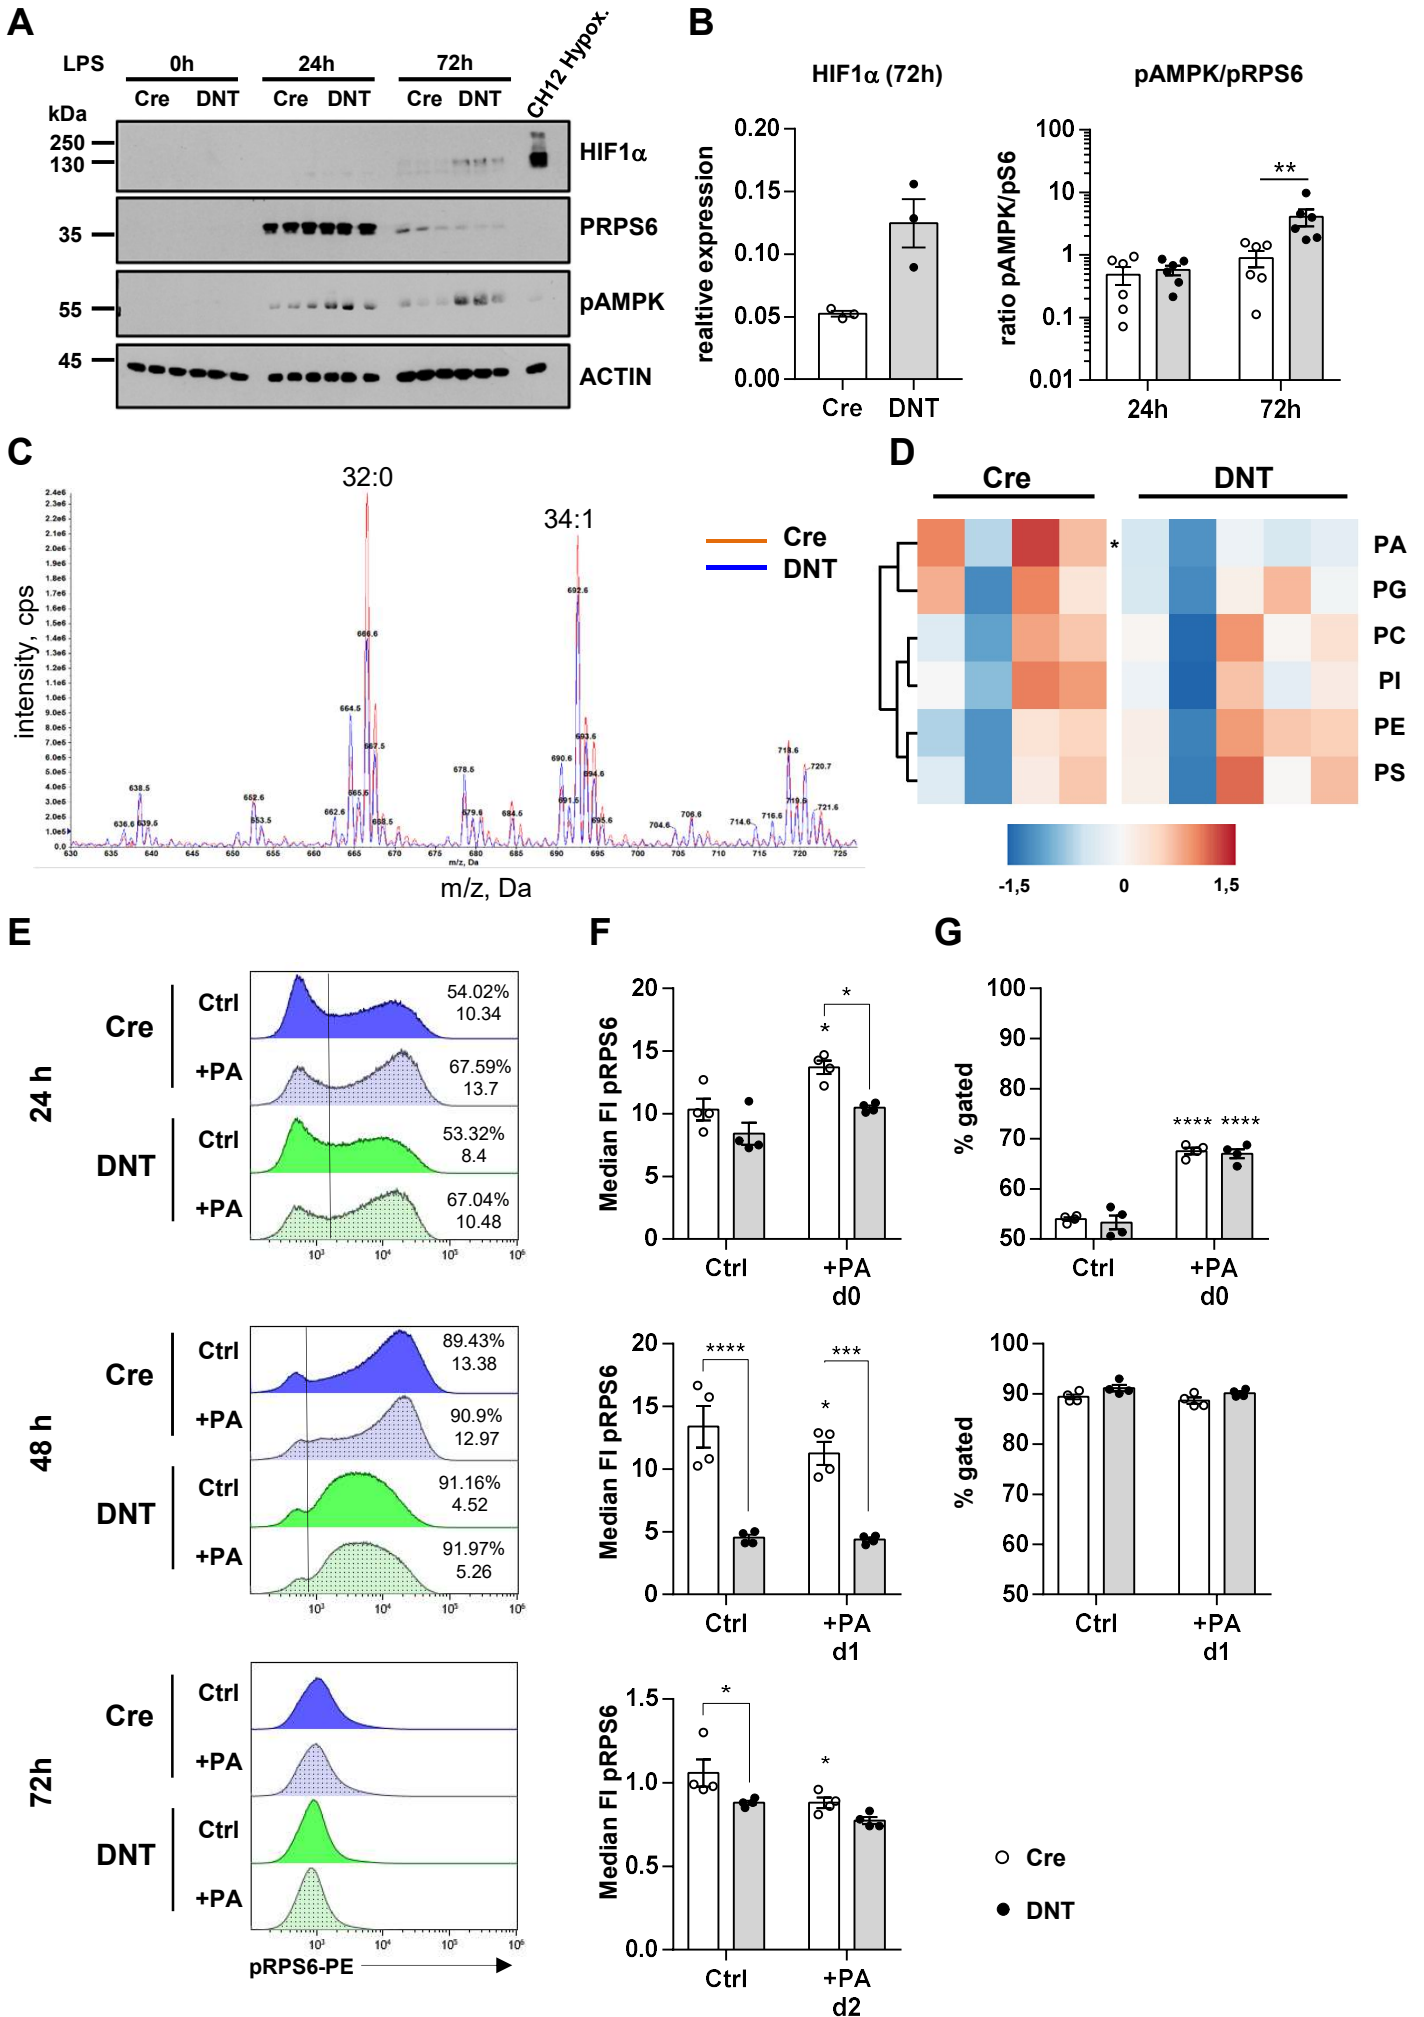

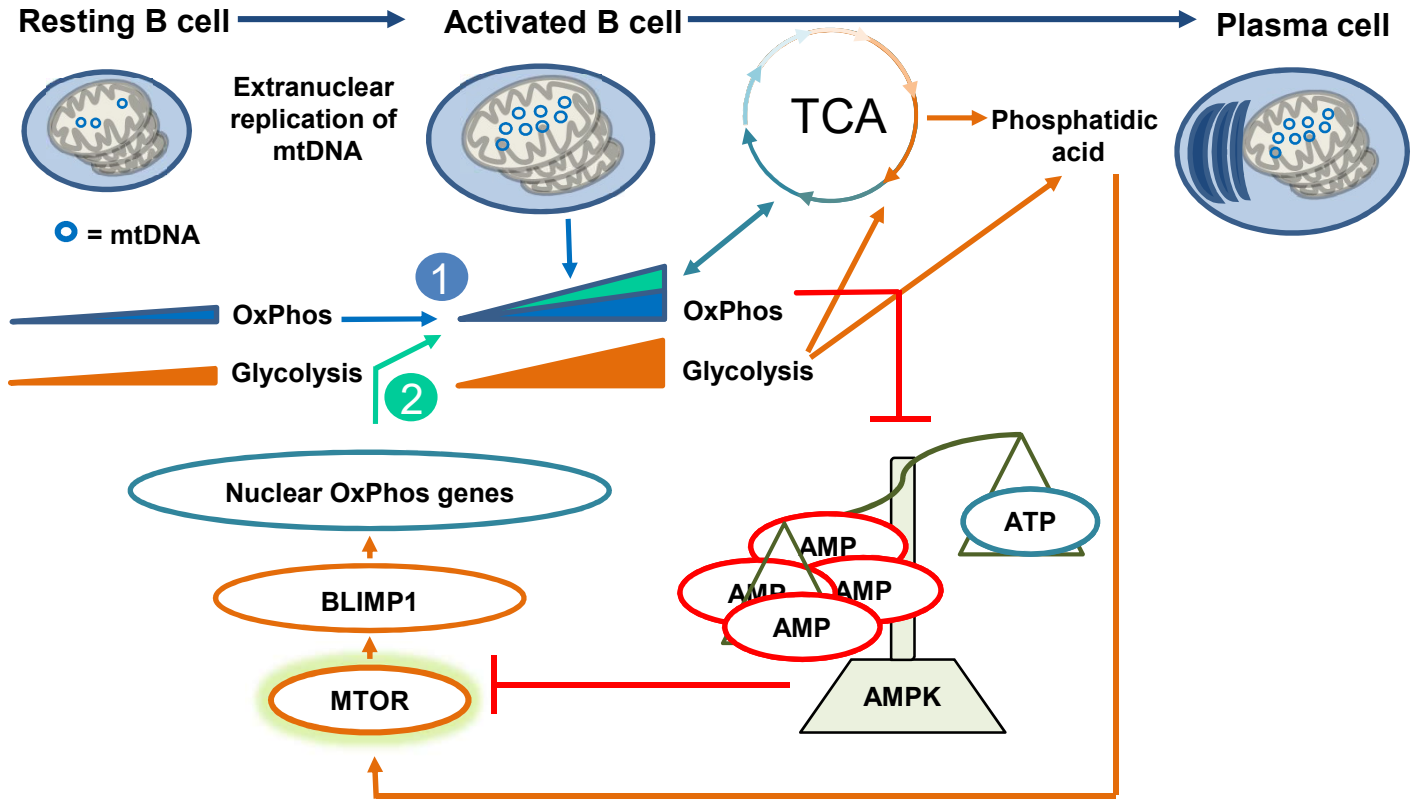

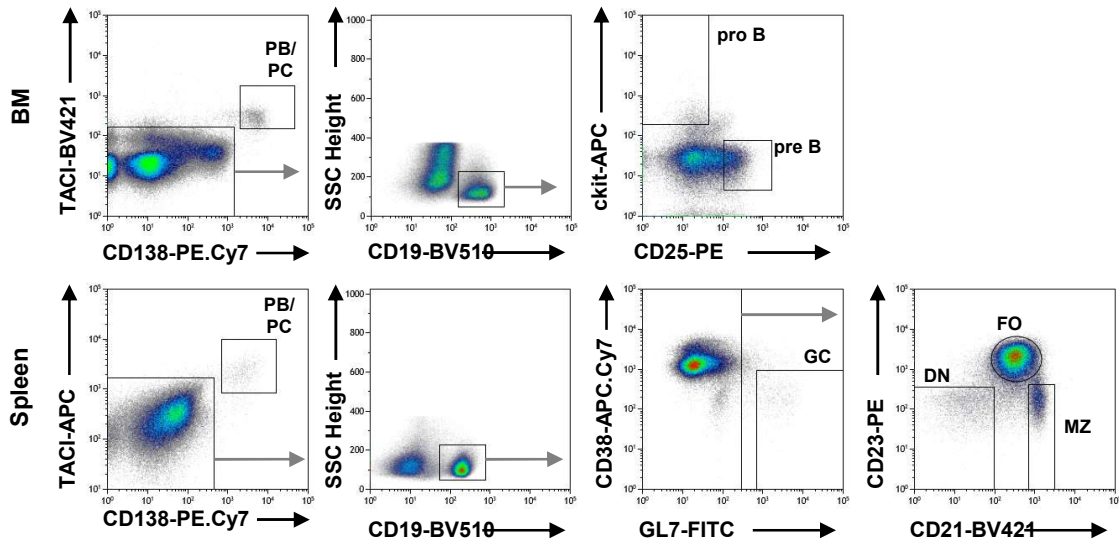

### Figure S1| Flow cytometric cell sorting of murine B cell subsets

WT mice were immunized with SRBCs and B cell subsets were sorted using flow cytometry from the bone marrow and spleen after 10 days. Bone marrow (top): PCs are defined as TACI<sup>+</sup>CD138<sup>+</sup>, pro B cells are CD19<sup>+</sup>ckit<sup>+</sup> and pre B cells are CD19<sup>+</sup>CD25<sup>+</sup>. Spleen (bottom): PCs are TACI<sup>+</sup>CD138<sup>+</sup>, GCs are CD19<sup>+</sup>CD38<sup>low</sup>GL7<sup>high</sup>, FOs are CD19<sup>+</sup>CD21<sup>+</sup>CD23<sup>+</sup>, MZs are CD19<sup>+</sup>CD21<sup>+</sup>CD23<sup>low</sup> and DN are CD19<sup>+</sup>CD21<sup>-</sup>CD23<sup>-</sup>. Related to Figure 1.

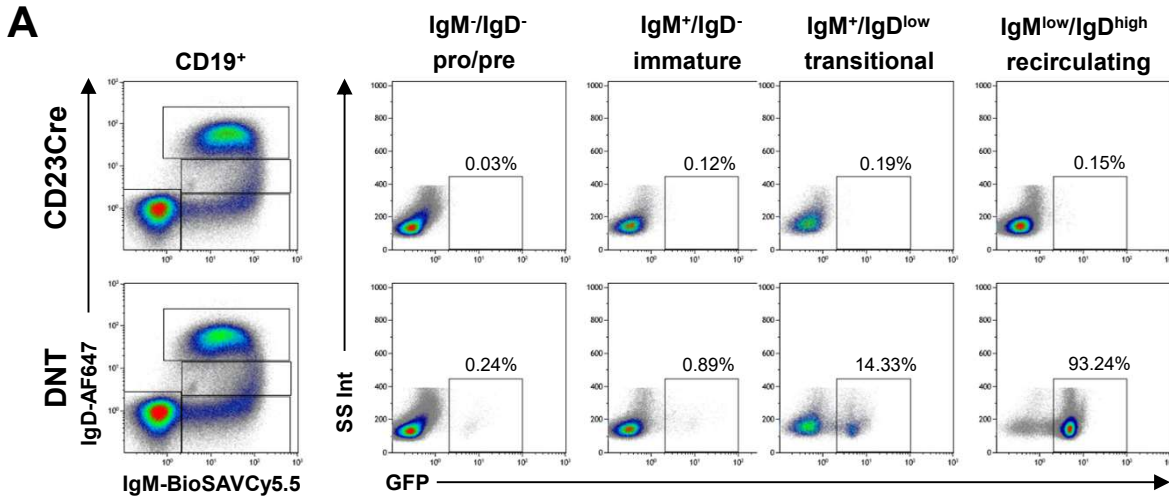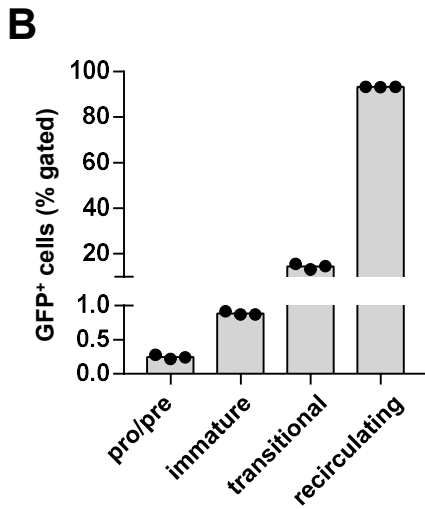

**Figure S2| Onset of GFP expression during B cell development in DNT mice**

A, Bone marrow cells of CD23CRE and DNT mice pregated on CD19<sup>+</sup> were stained with anti IgM and anti IgD antibodies. GFP positive cells of the indicated B cell populations are depicted as dot blots. B, Frequencies of GFP positive cells in the indicated populations defined in A. Each dot represents one mouse. Related to Figure 1.



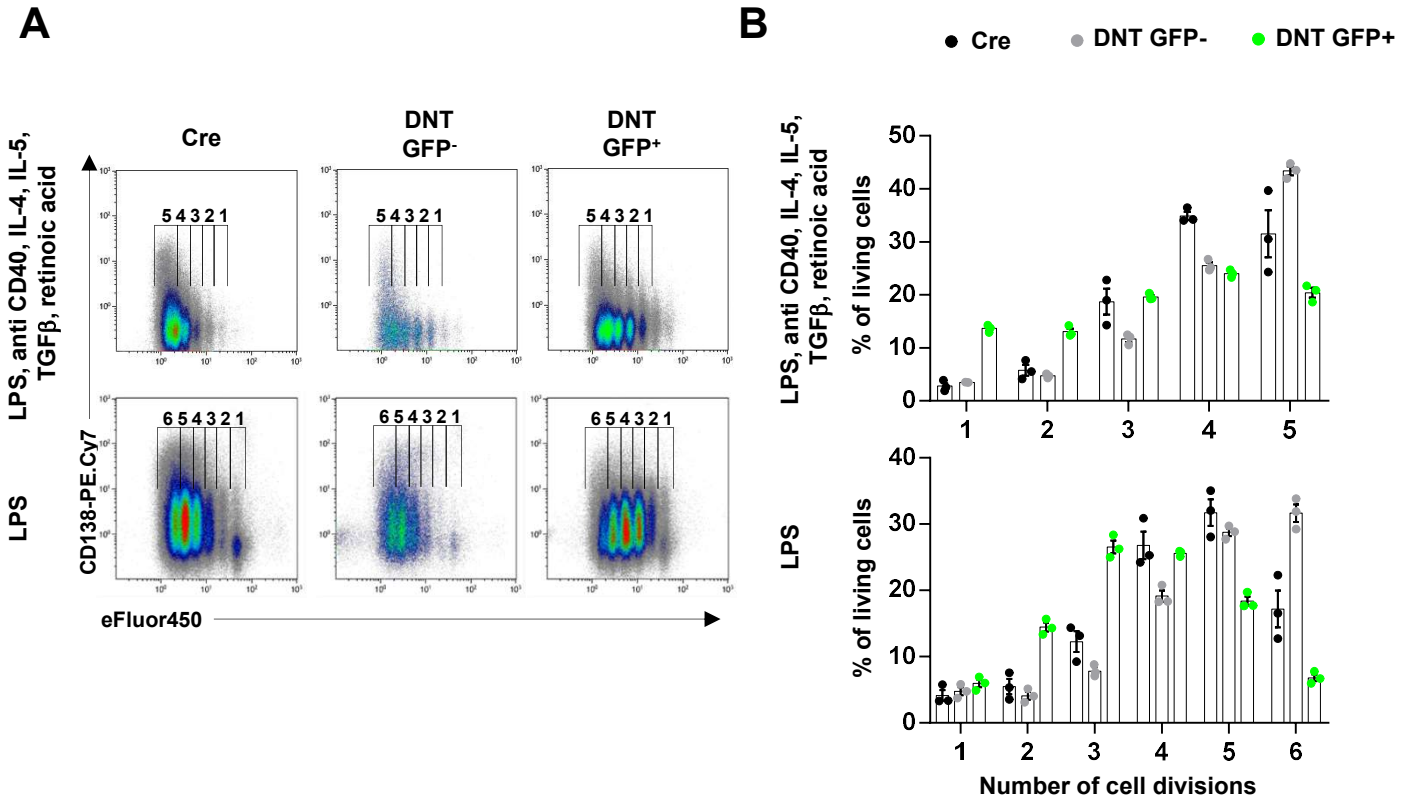

**Figure S3| Impaired proliferation of T-dependently and T-independently activated DNT B cells**

A, Splenic B cells from CD23CRE and DNT mice were labelled with eFluor450, stimulated with LPS, anti CD40, IL-4, IL-5, TGF $\beta$ , retinoic acid for 4 days or with LPS alone for 3 days, stained with anti CD138 antibody and analyzed by flow cytometry. B, CD138 expressing B cells relative to the number of cell divisions of CD23CRE or DNT mice is depicted. Black symbols represent CD23CRE B cells, green symbols show GFP<sup>+</sup> B cells of DNT mice and grey symbols show GFP<sup>-</sup> B cells of DNT mice from the same culture. Related to Figure 5.

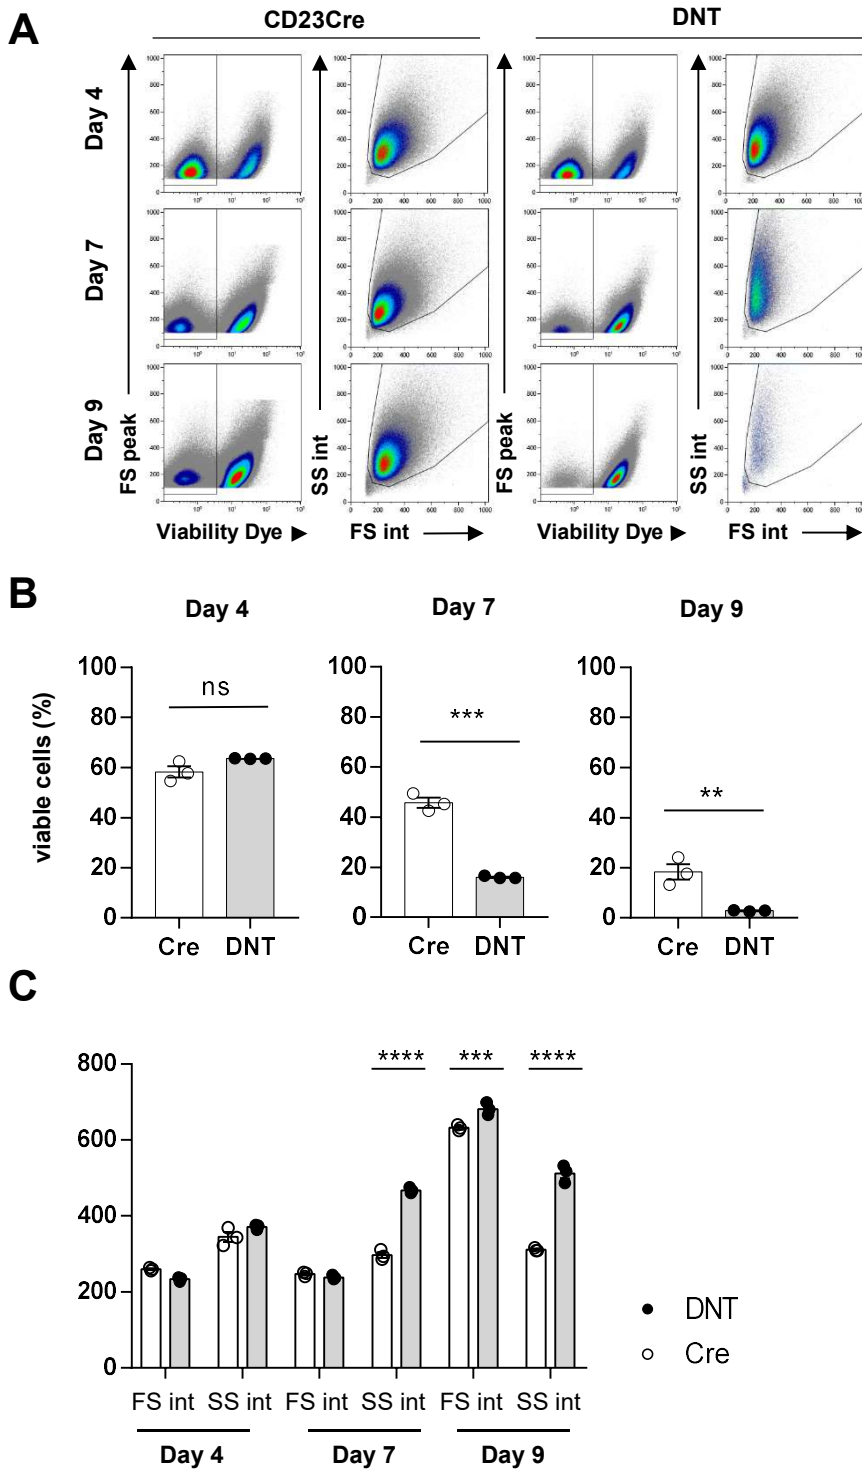

**Figure S4| Impaired survival and morphological changes activated DNT B cells**

A, Splenic B cells from CD23CRE and DNT mice were stimulated with LPS, anti CD40, IL-4, IL-5, TGF $\beta$ , retinoic acid for 4, 7 and 9 days, stained with a viability dye and analyzed by flow cytometry. Merged dot plots of 3 mice per genotype are shown. B, Quantification of viable cells according to the gating in A. C, Quantification of the forward and side scatters of viable cells shown in A. Related to Figure 5.

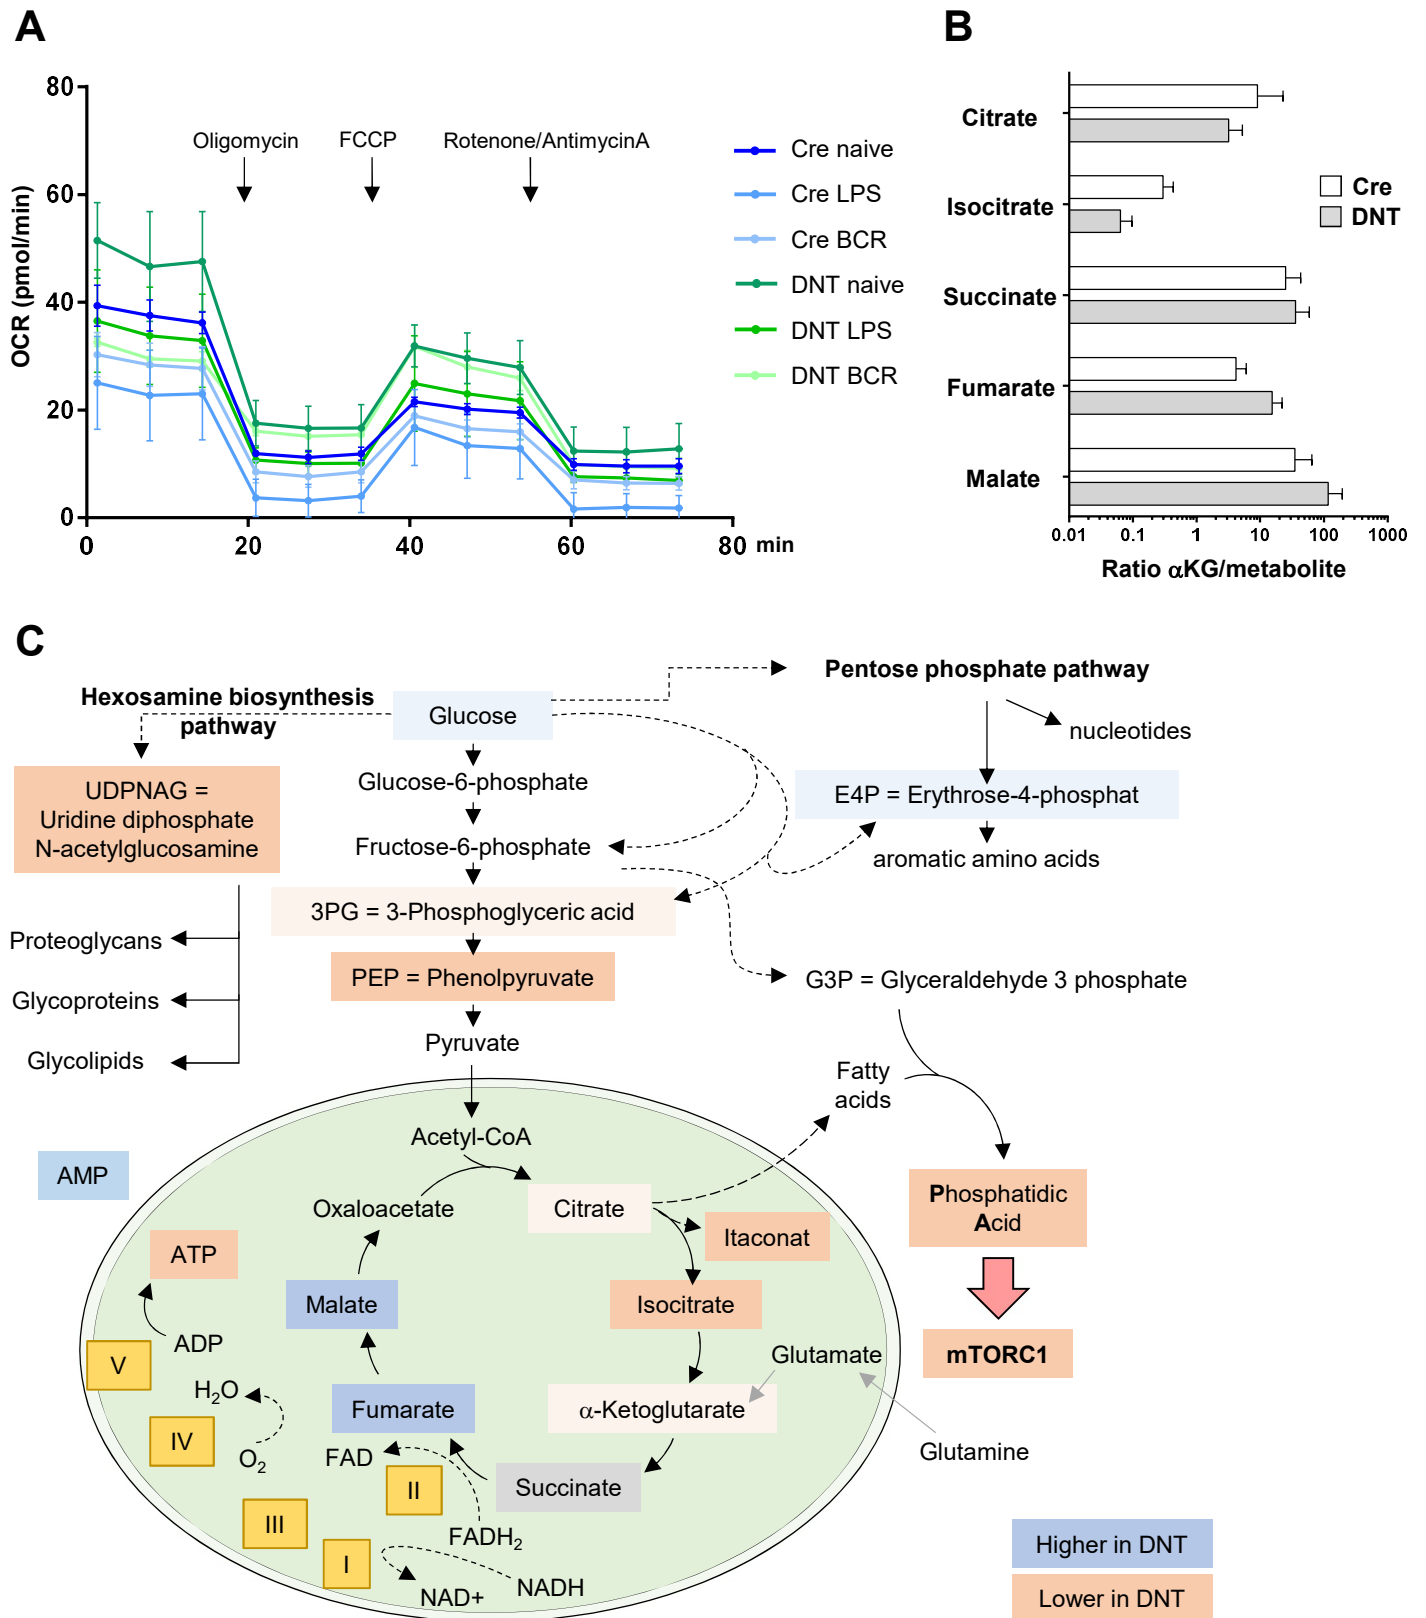

**Figure S5| Metabolic alterations of resting and LPS activated DNT B cells**

A, Splenic B cells from CD23CRE and DNT mice were left non-activated, stimulated with LPS or with anti B cell receptor antibody for 6h and extracellular flux was analyzed. The oxygen consumption rate (OCR) was measured basally and after injection of oligomycin, FCCP and rotenone + antimycin A. Symbols represent means of 2-4 mice, error bars are  $\pm$  SEM. B, Ratio of  $\alpha$ -Ketoglutarate to upstream and downstream metabolites of the TCA cycle in 3d LPS stimulated CRE and DNT B cells. C, Schematic of glycolysis, the hexosamine biosynthesis and pentose phosphate pathways and the TCA cycle. Roman letters indicate OxPhos complexes I-V. Metabolites decreased in DNT B cells are shown in orange colour, increased metabolites are indicated in blue colour, and unchanged in grey. G3P, Glyceraldehyde-3-phosphate, 3PG, 3-Phosphoglycerate, E4P, Erythrose-4-Phosphate, NAD, Nicotinamide adenine dinucleotide, NADPH, Nicotinamide Adenine Dinucleotide phosphate, FAD, Flavine Adenine Dinucleotide, FADH<sub>2</sub>, Flavine Adenine Dinucleotide Dihydrate. Related to Figure 7.

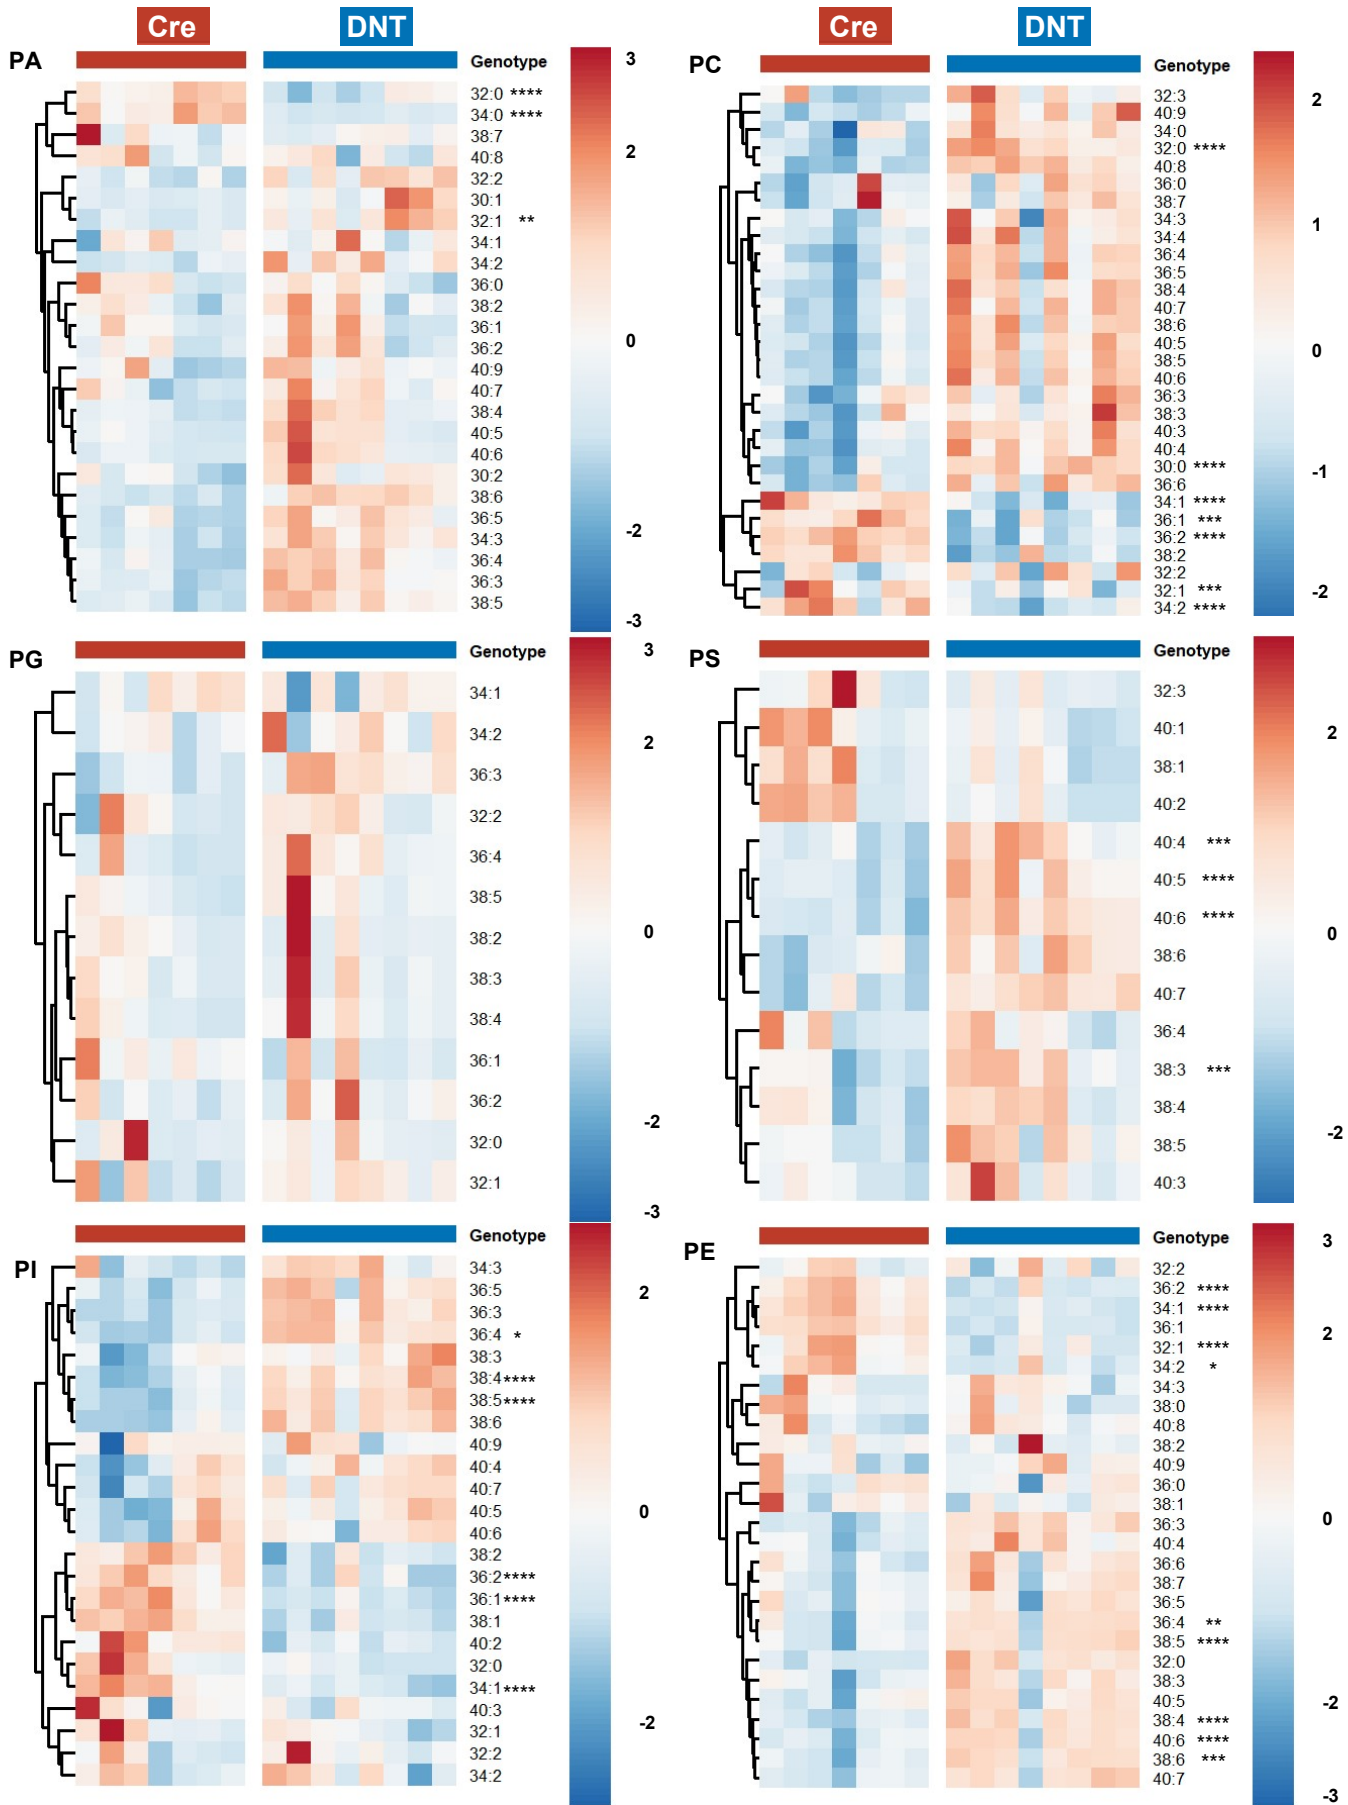

**Figure S6| Phospholipids in DNT expressing LPS blasts**

Splenic B cells from CD23CRE and DNT mice were stimulated with LPS for 3d. Glycerophospholipids of FACS sorted B cells (Gating: DNT: viable and GFP<sup>+</sup>, CD23CRE: viable) were analysed via direct infusion MS/MS (*Shotgun Lipidomics*). The relative abundance (Mol%) of subspecies of phosphatidic acid (PA), phosphatidylglycerol (PG), phosphatidylinositol (PI), phosphatidylcholine (PC), phosphatidylethanolamine (PE) and phosphatidylserine (PS) is depicted as heatmap. Each symbol represents one mouse. The first number depicts the total number of carbon atoms, the second number the total number of double bonds within the two fatty acyl chains. Combined results from 2 experiments, N=2, n=3-5; statistics calculated using 2-way ANOVA. Related to Figure 8.

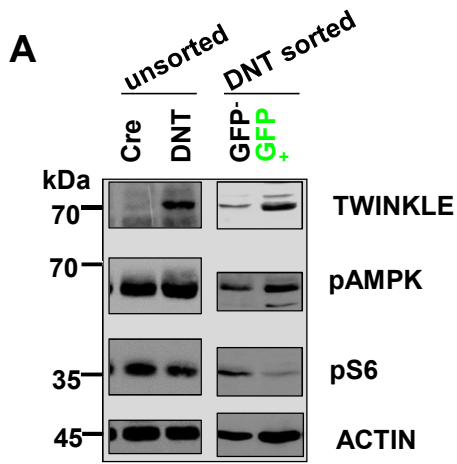

**Figure S7 | pAMPK and pRPS6 expression in DNT expressing B cells**

Unsorted splenic B cells from CD23CRE and DNT mice were stimulated with LPS for 3d. Cell lysates were separated by 10% SDS-PAGE, transferred to nitrocellulose and stained with antibodies as indicated on the right (left). Right: Splenic B cells from DNT mice were stimulated with LPS for 3d. GFP<sup>+</sup> and GFP<sup>-</sup> cells were sorted out. Cell lysates were separated by 10% SDS-PAGE, transferred to nitrocellulose and stained with antibodies as indicated on the right. Molecular mass standards are shown on the left (kDa). Related to Figure 8.

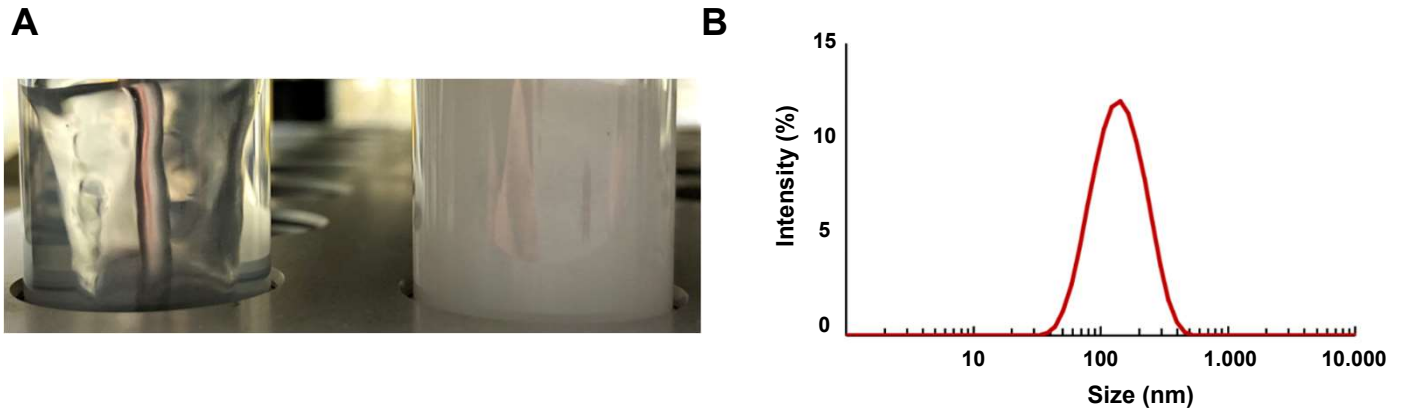

### Figure S8| Liposome production

A, Liposome production in miniaturized stirred tank reactors. On the left: Liposomes in aqueous buffer after evaporation of the chloroform (6 hours after injection). On the right: Dispersed whitish emulsion directly after injection of the phospholipid 16:0 PA, dissolved in chloroform. B, Intensity based particle size distribution of the liposomes after a final process time of 6 hours, shown exemplarily for one of the liposome samples used in this study. The sample showed a polydispersity index (PDI) of 0.167 and a z average cumulants mean of 122 nm. Related to Figure 9.
